# Supplementary material for: Concise assembly of 7-ethynyl-6,8-dioxabicyclo[3.2.1]octanes from acetylenes and ketones
Source: Royal Society of Chemistry journal article supplement (doi:10.1039/d3ob00252g), 2023-01-01

Supplementary information for

**Concise assembly of ethynyl-6,8-dioxabicyclo[3.2.1]octanes from acetylenes and ketones**

Elena Yu. Schmidt, Ivan A. Bidusenko, Nadezhda I. Protsuk, Igor A. Ushakov and Boris A. Trofimov\*

*A.E. Favorsky Irkutsk Institute of Chemistry, Siberian Branch of the Russian Academy of Sciences, 1 Favorsky St., 664033 Irkutsk, Russian Federation*

\*Corresponding authors: [boris\\_trofimov@irioch.irk.ru](mailto:boris_trofimov@irioch.irk.ru)

**Table of contents**

|                                                                                                       |     |
|-------------------------------------------------------------------------------------------------------|-----|
| <sup>1</sup> H and <sup>13</sup> C Spectra of 2-acetyl-3,4-dihydropyrans <b>2</b> .....               | S2  |
| <sup>1</sup> H and <sup>13</sup> C Spectra of acetylenic alcohol <b>4</b> .....                       | S13 |
| <sup>1</sup> H and <sup>13</sup> C Spectra of 7-ethynyl-6,8-dioxabicyclo[3.2.1]octanes <b>5</b> ..... | S32 |

# $^1\text{H}$ and $^{13}\text{C}$ Spectra of 2-acetyl-3,4-dihydropyrans **2**

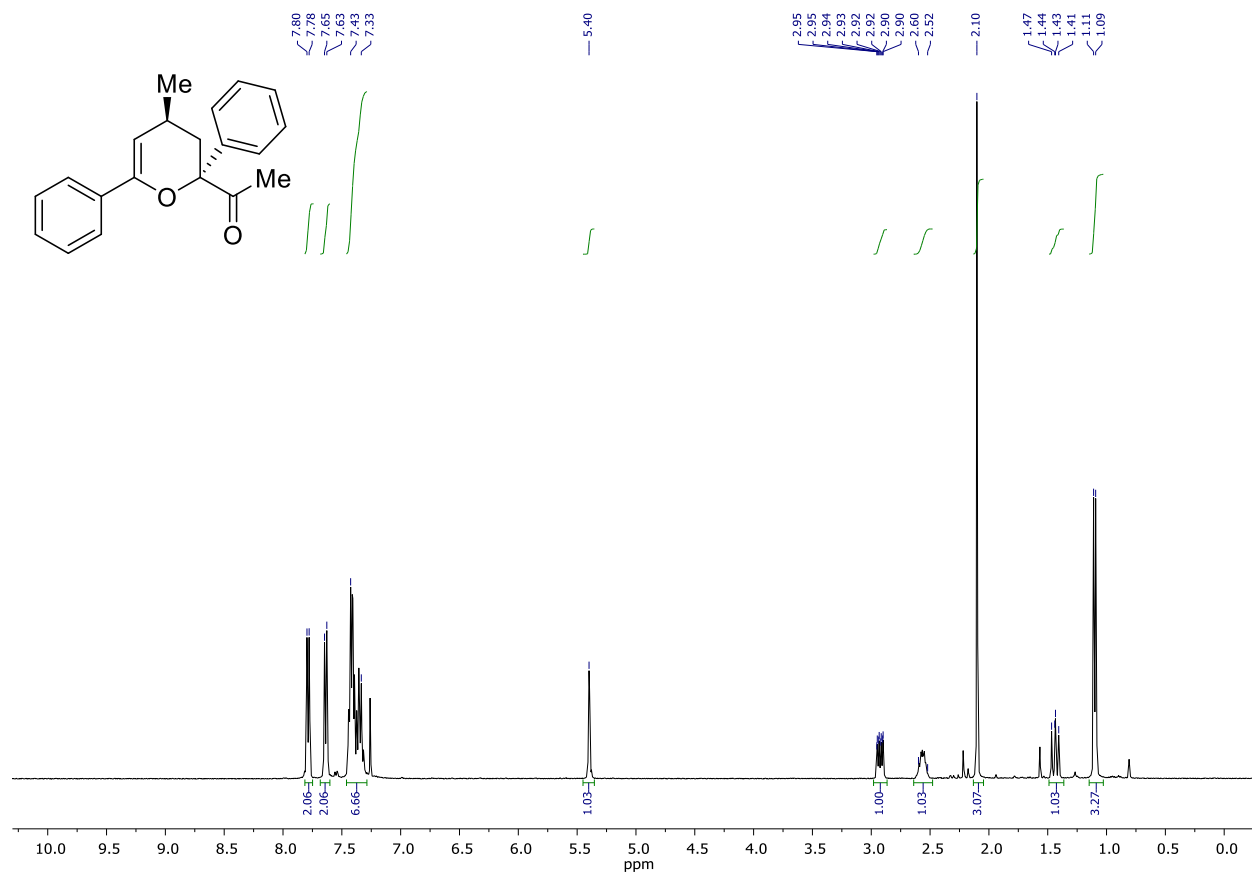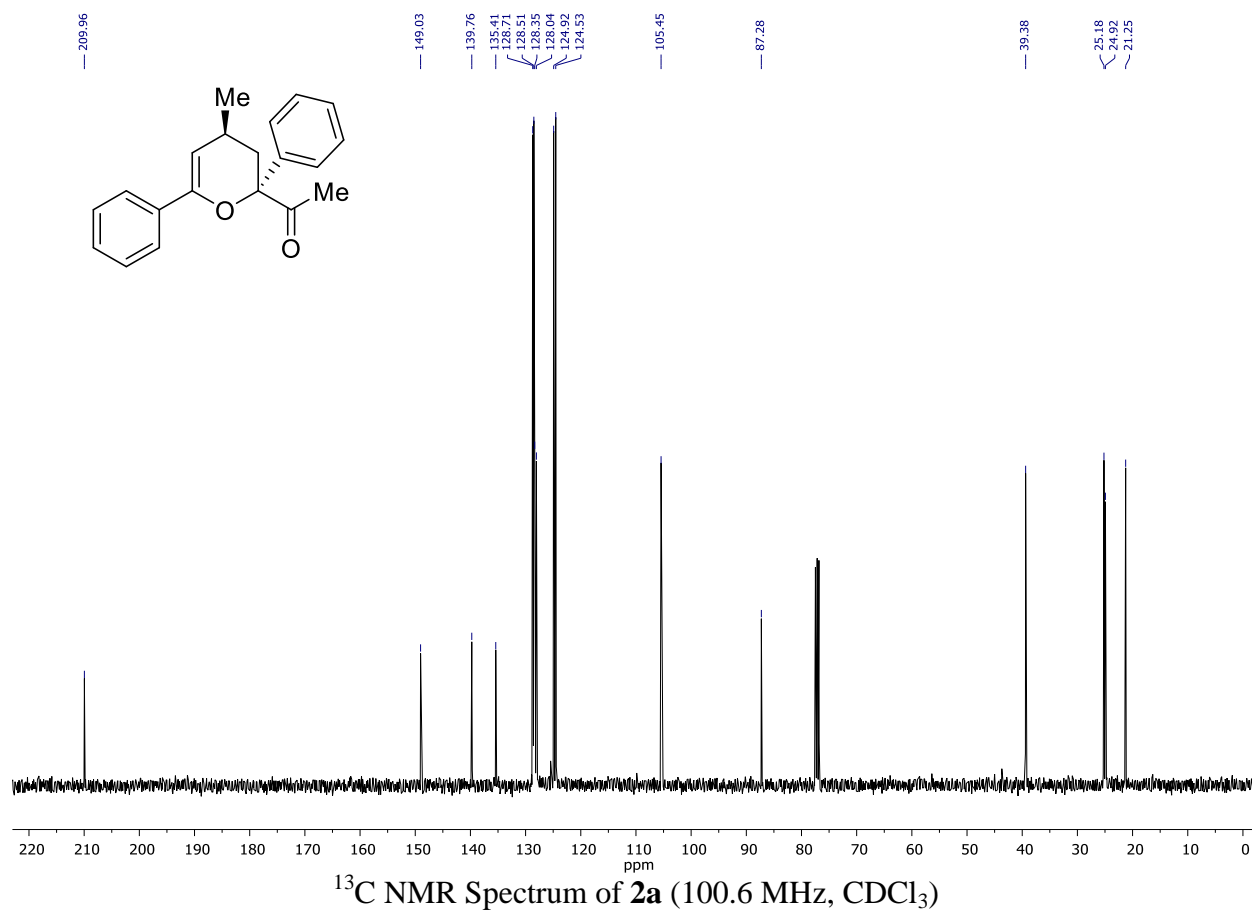

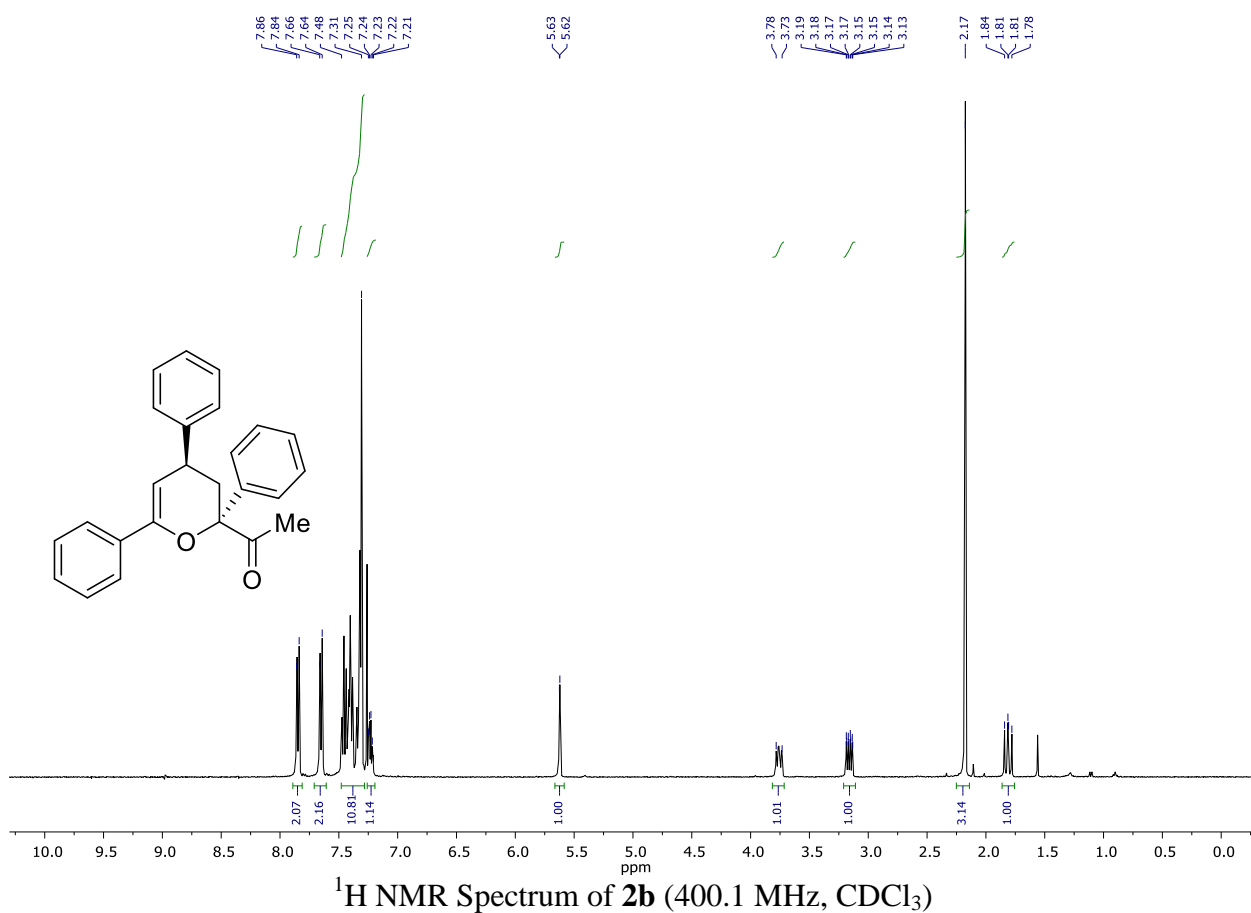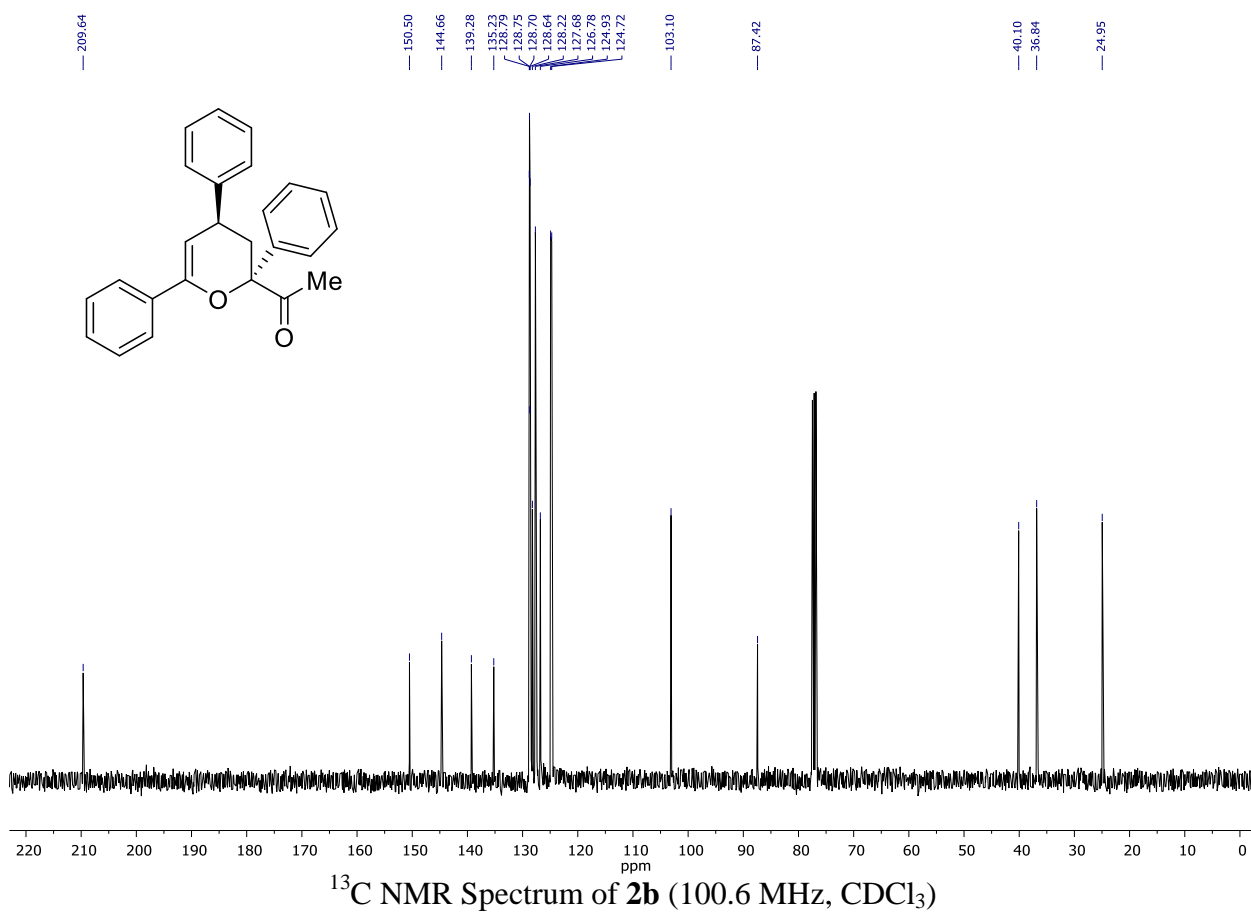

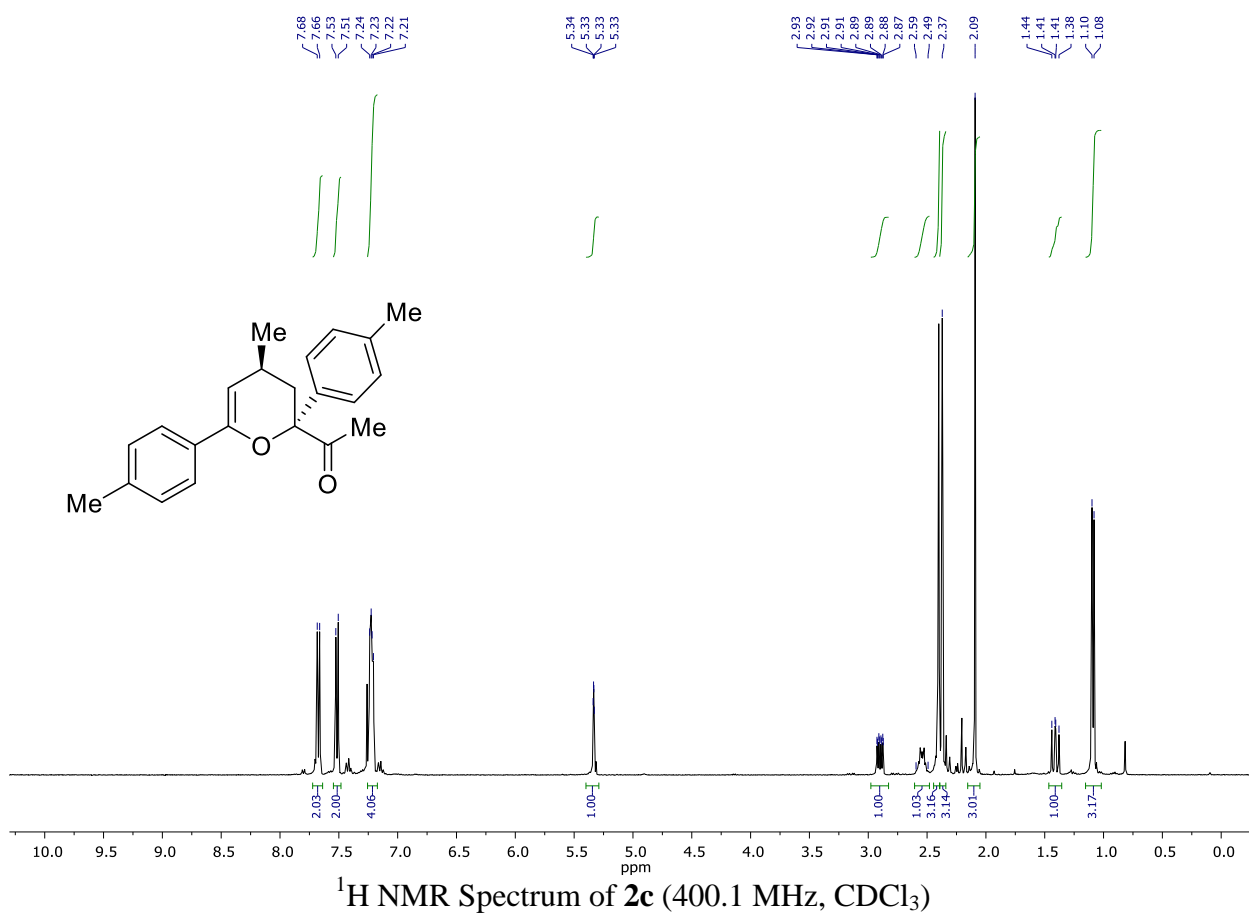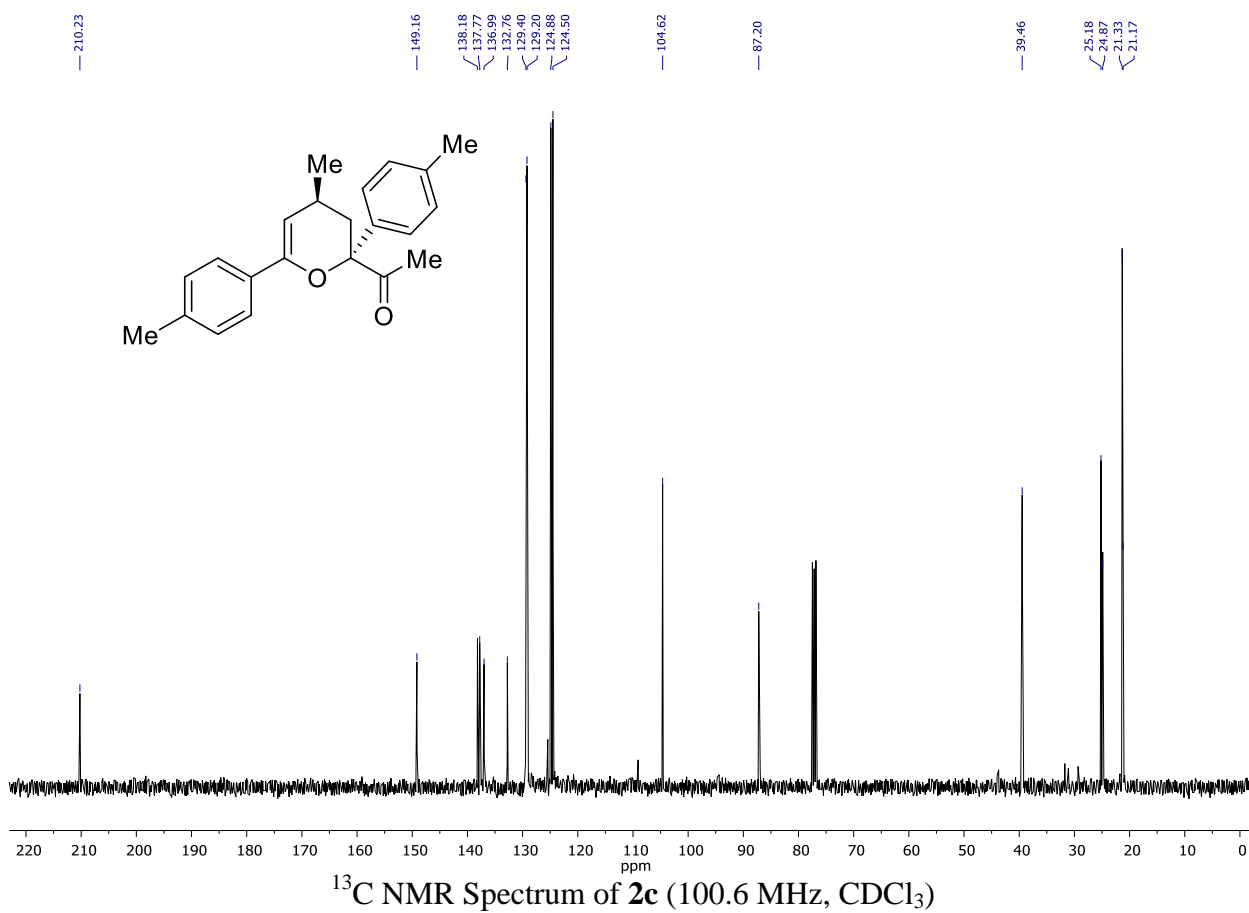



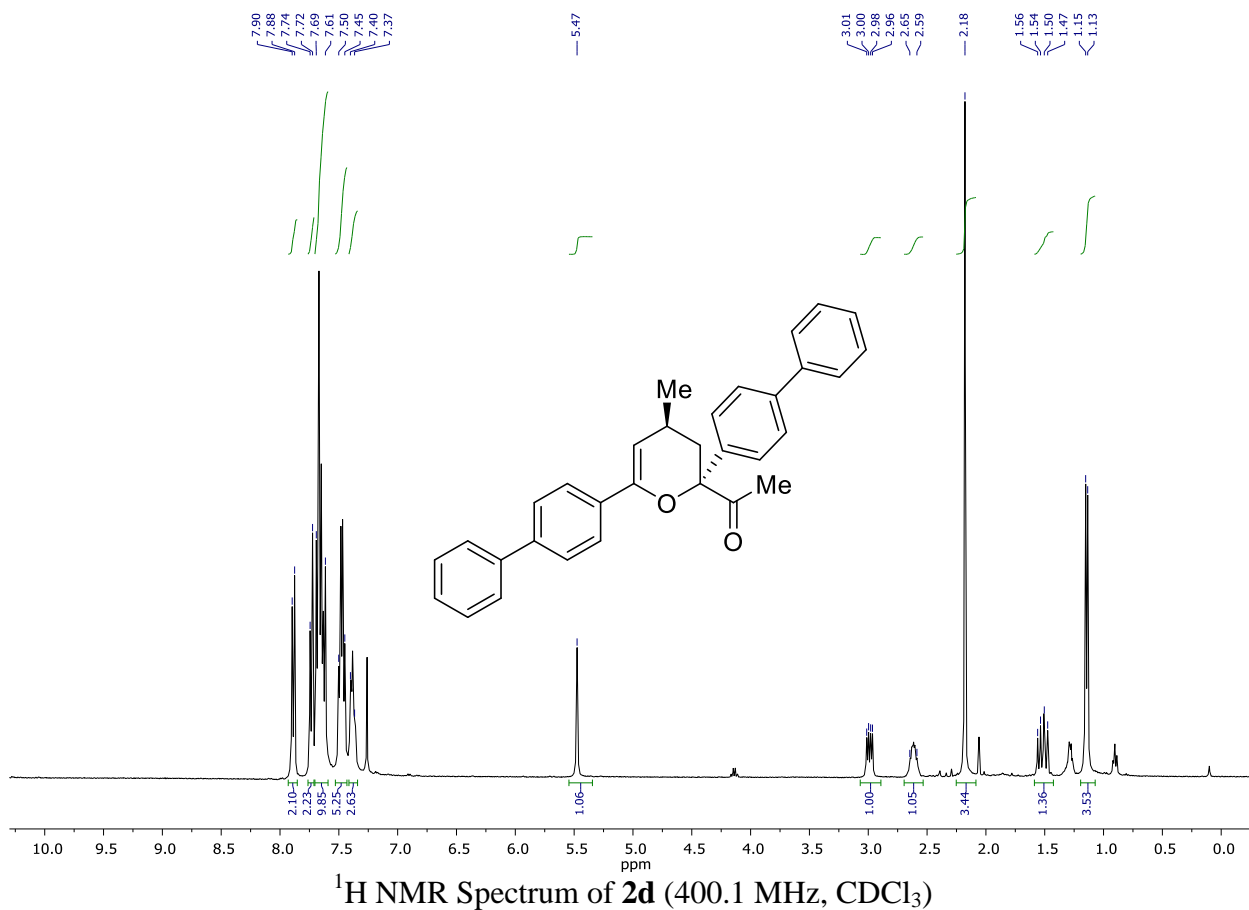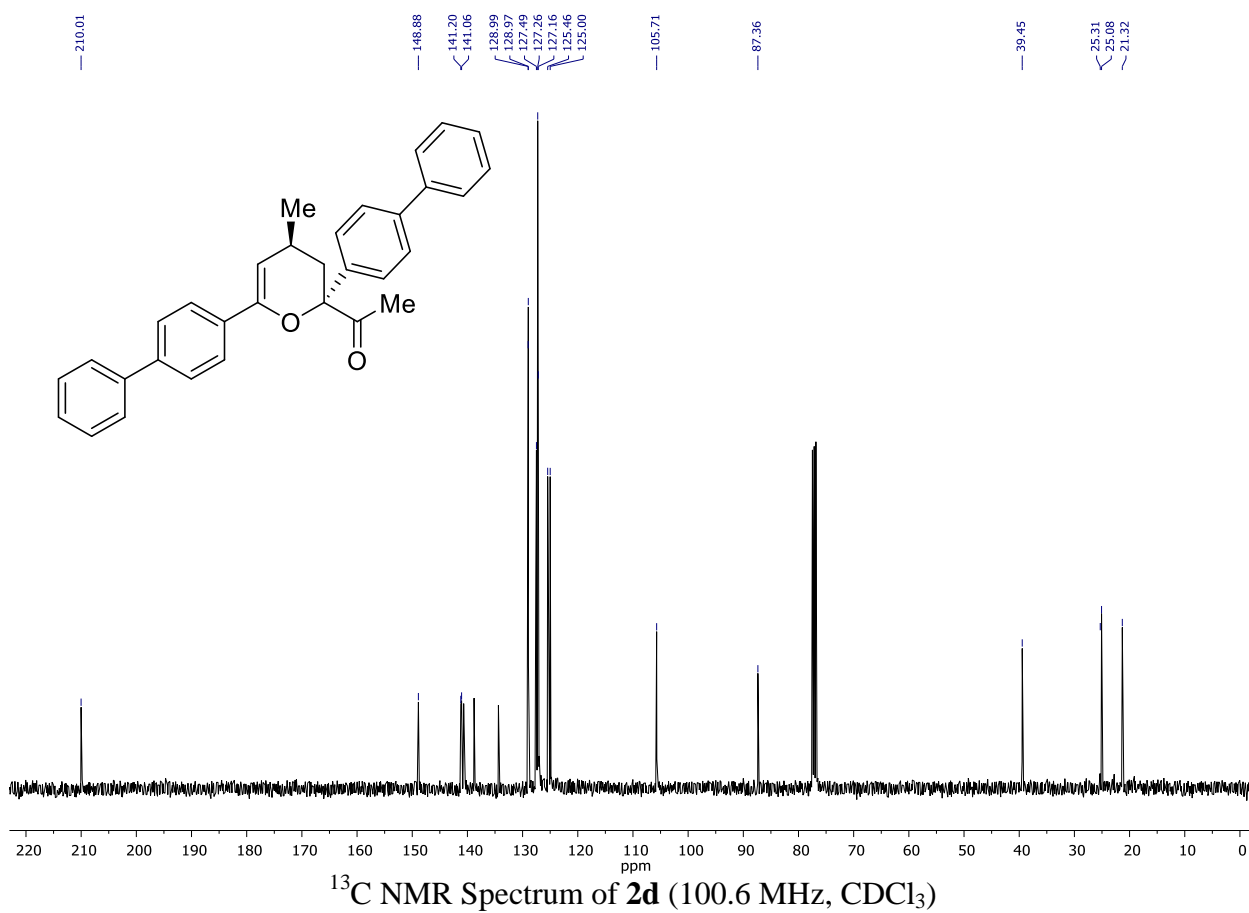

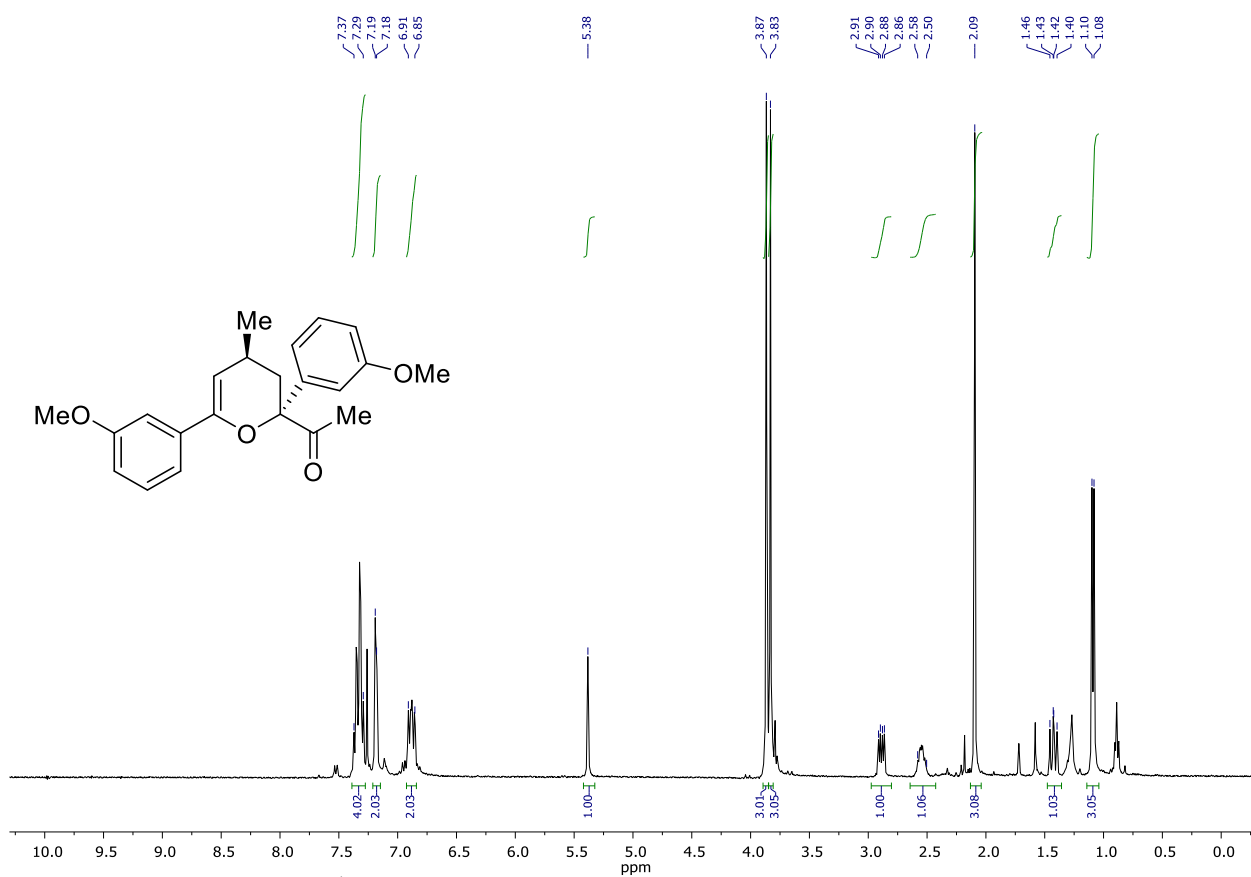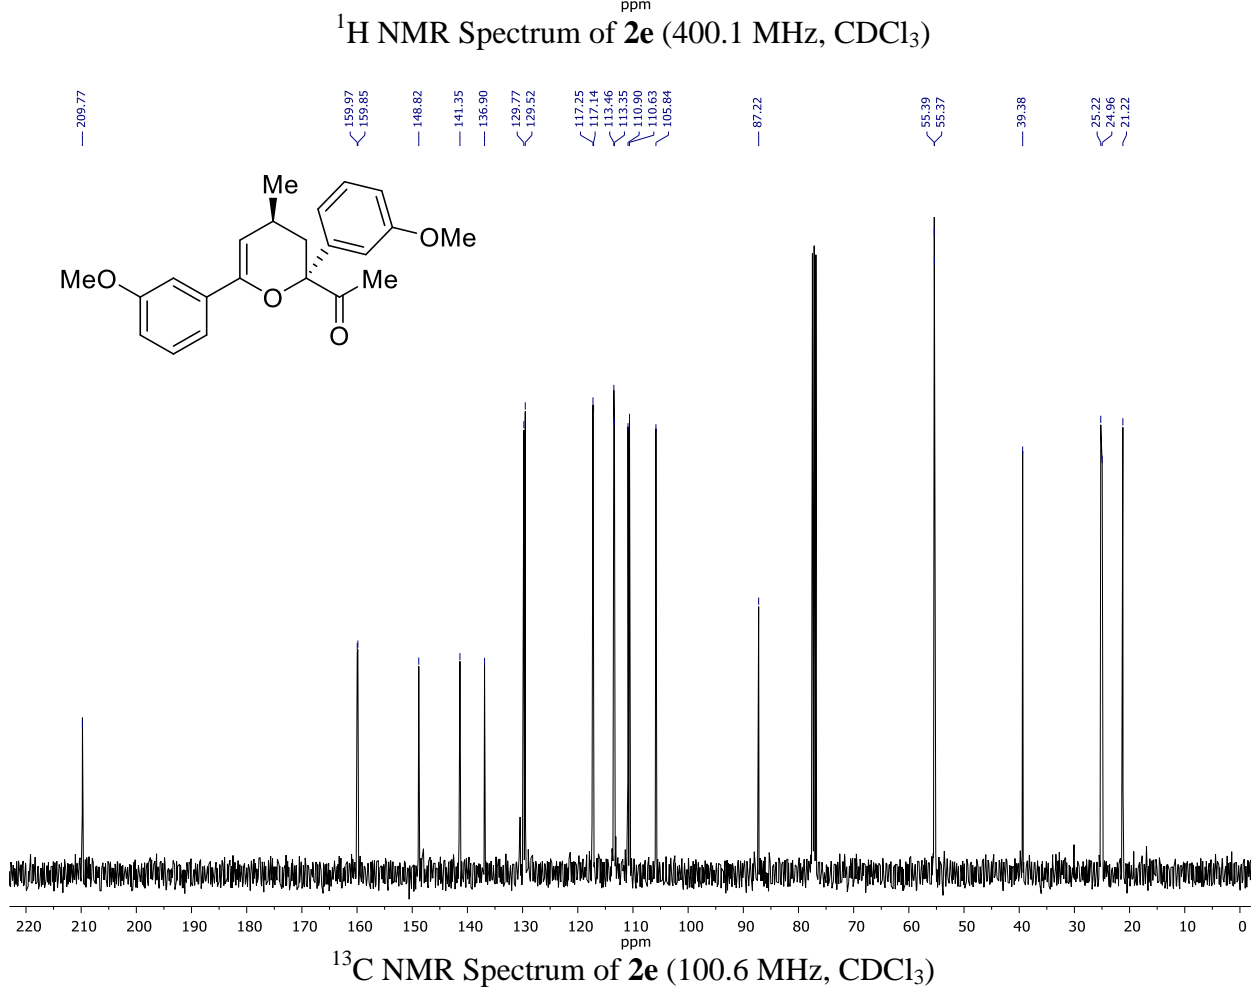

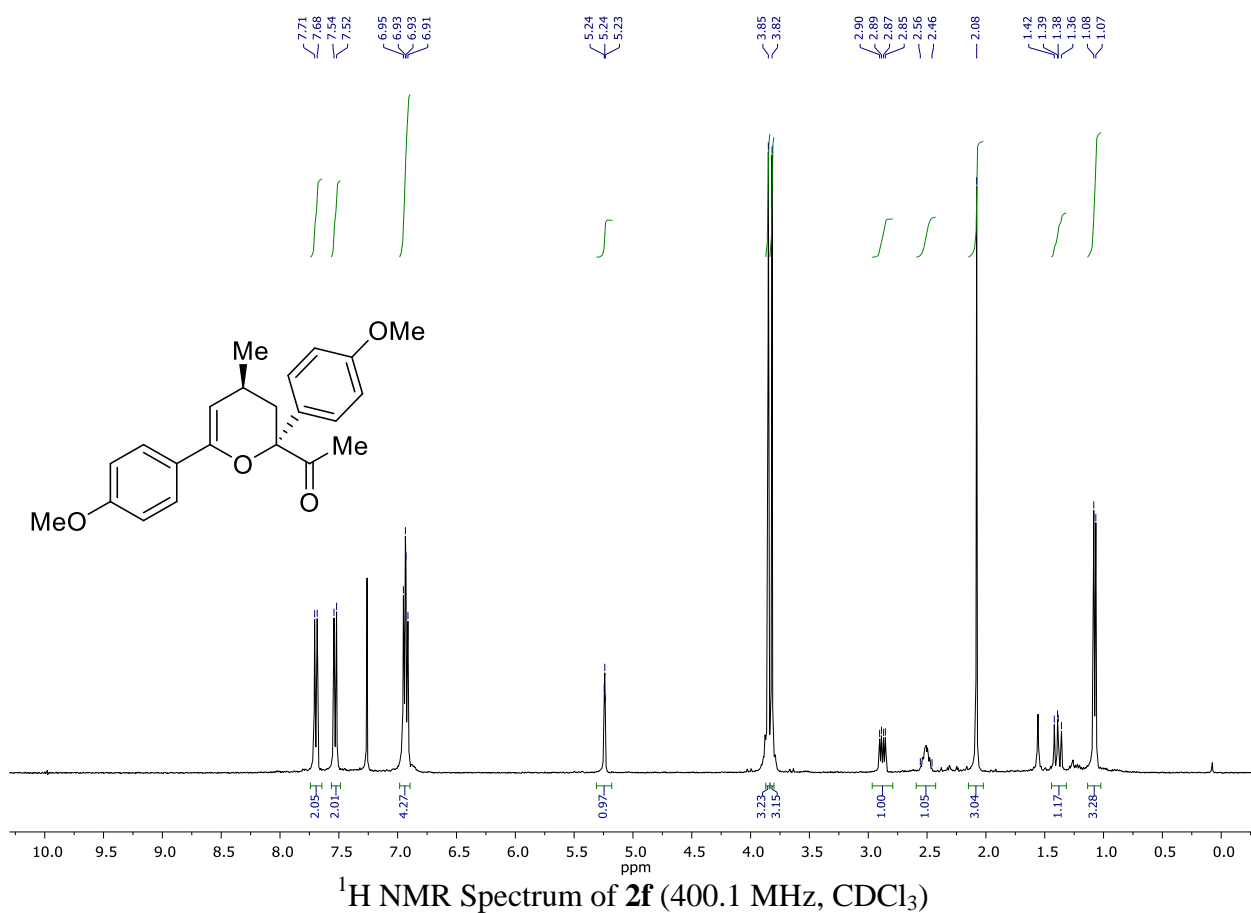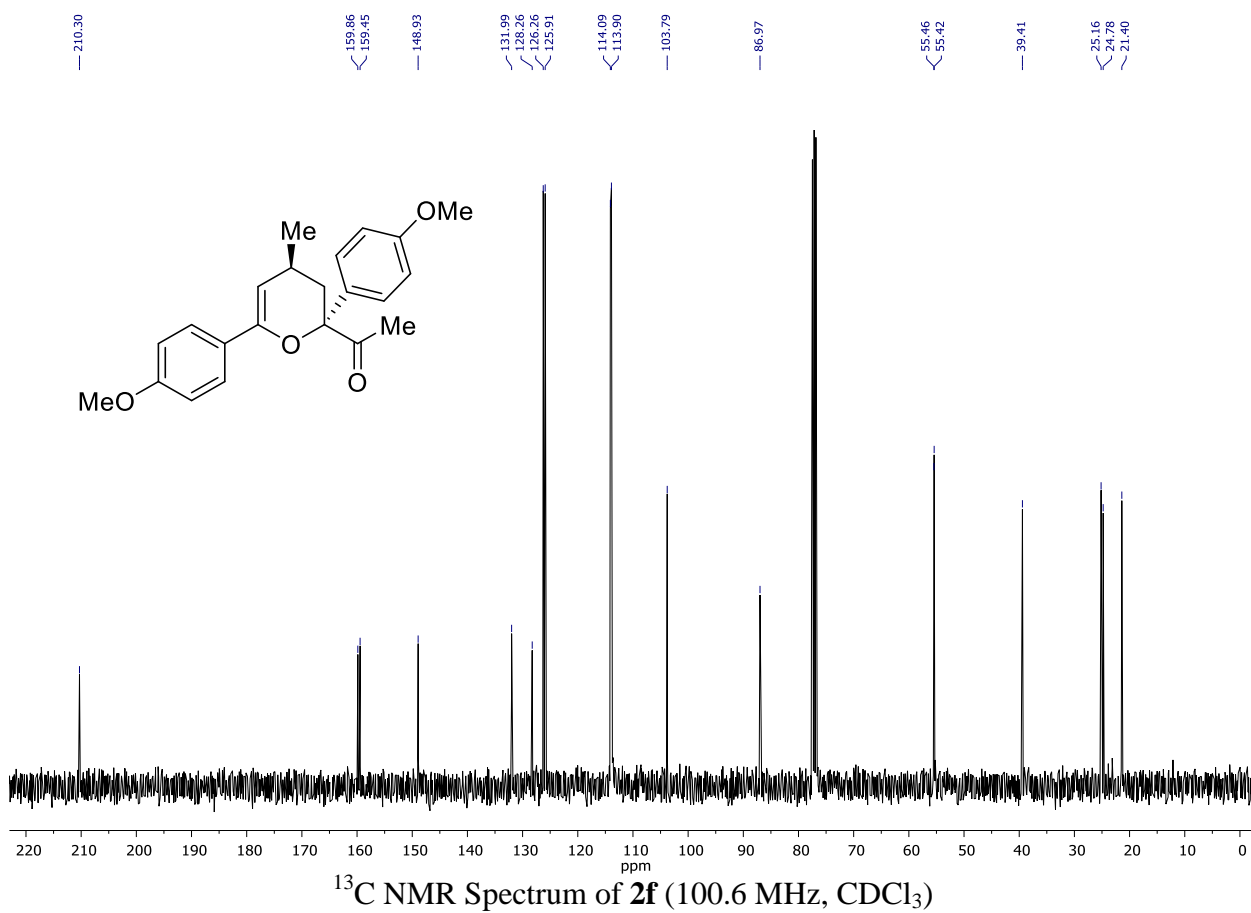

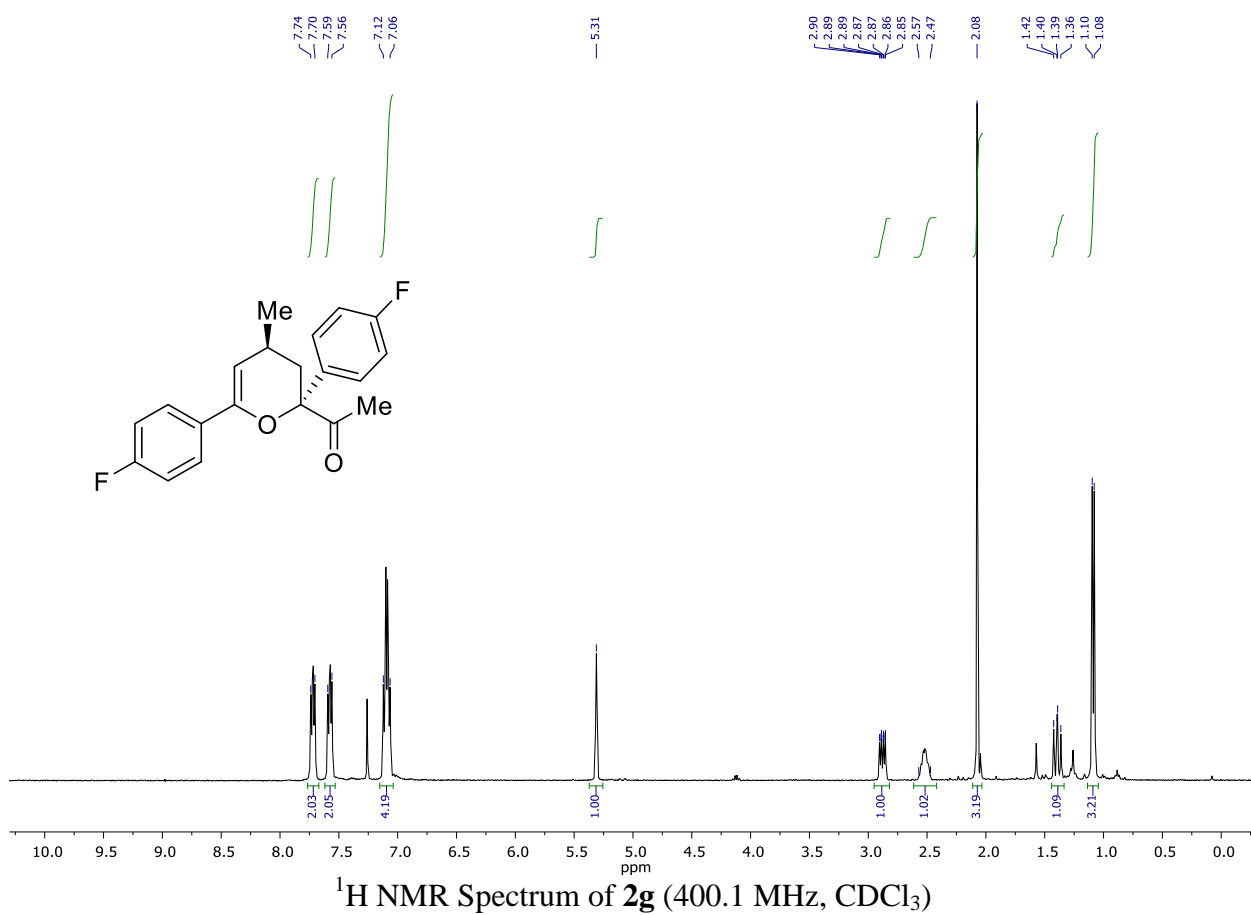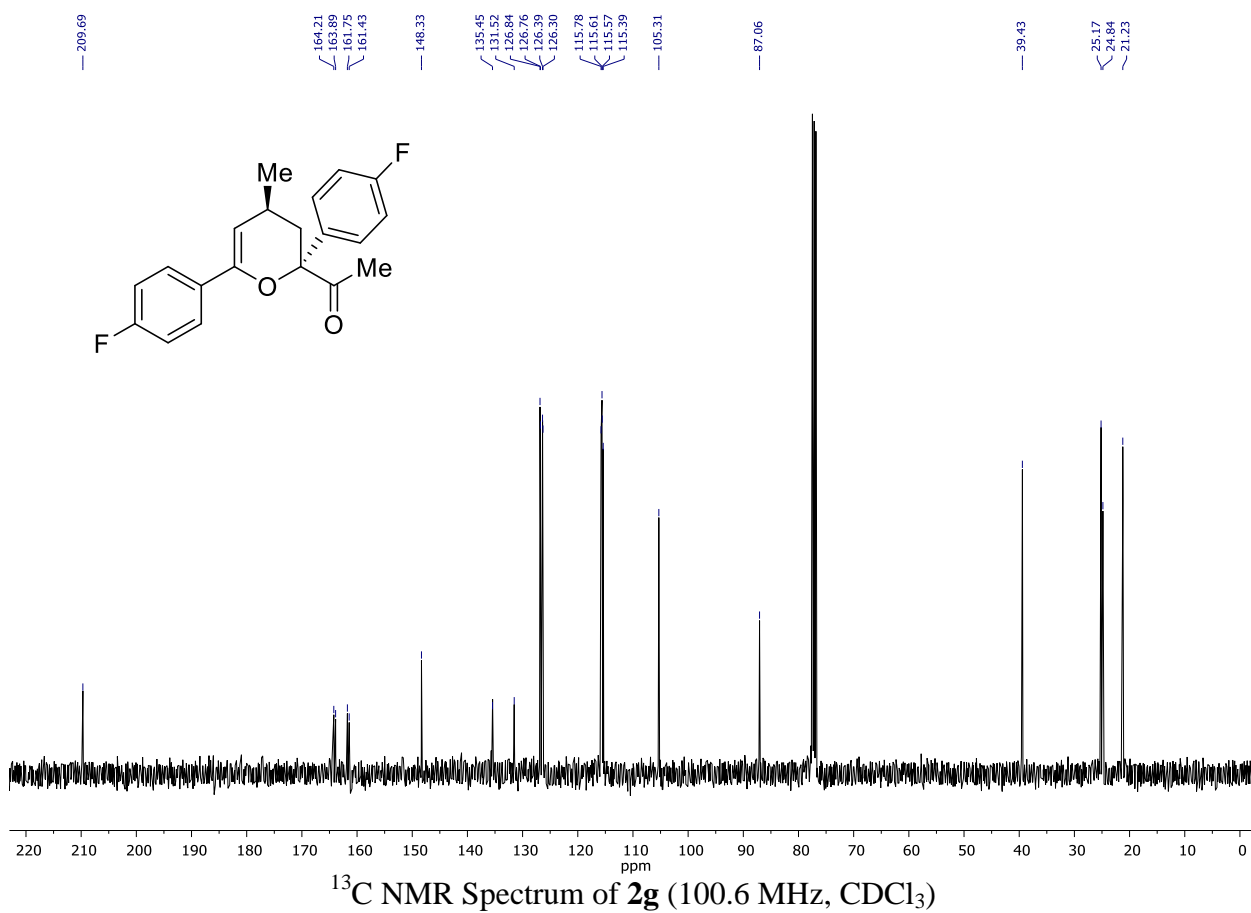

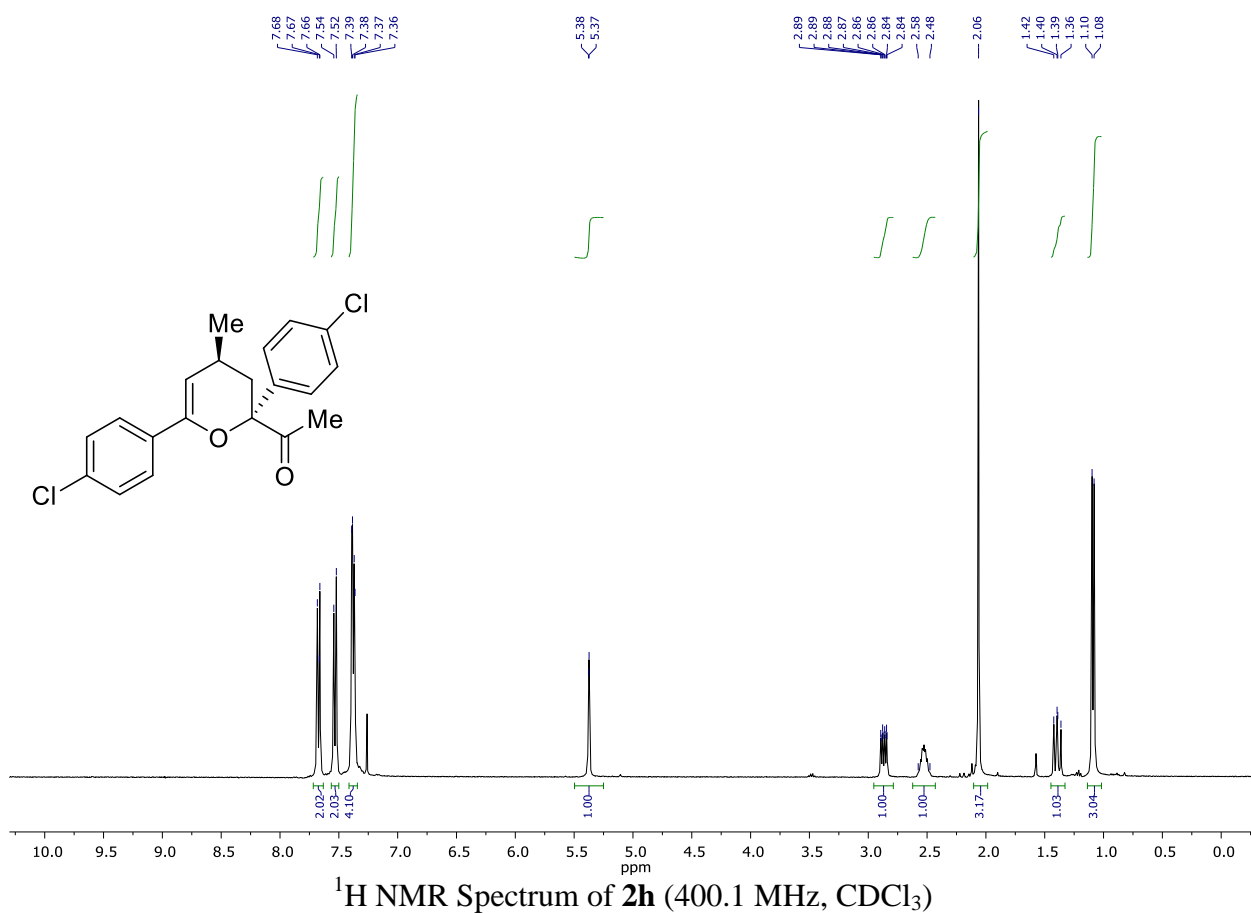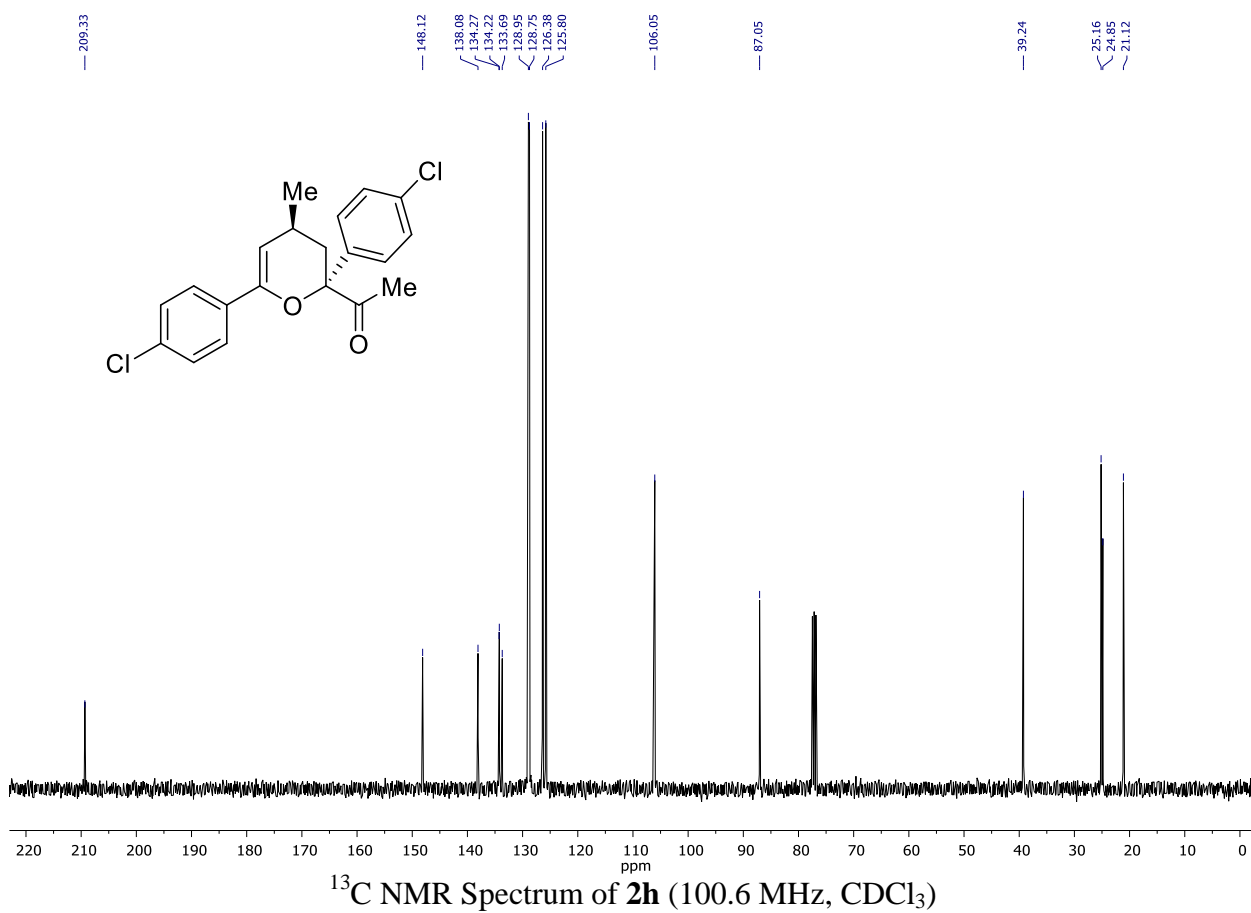

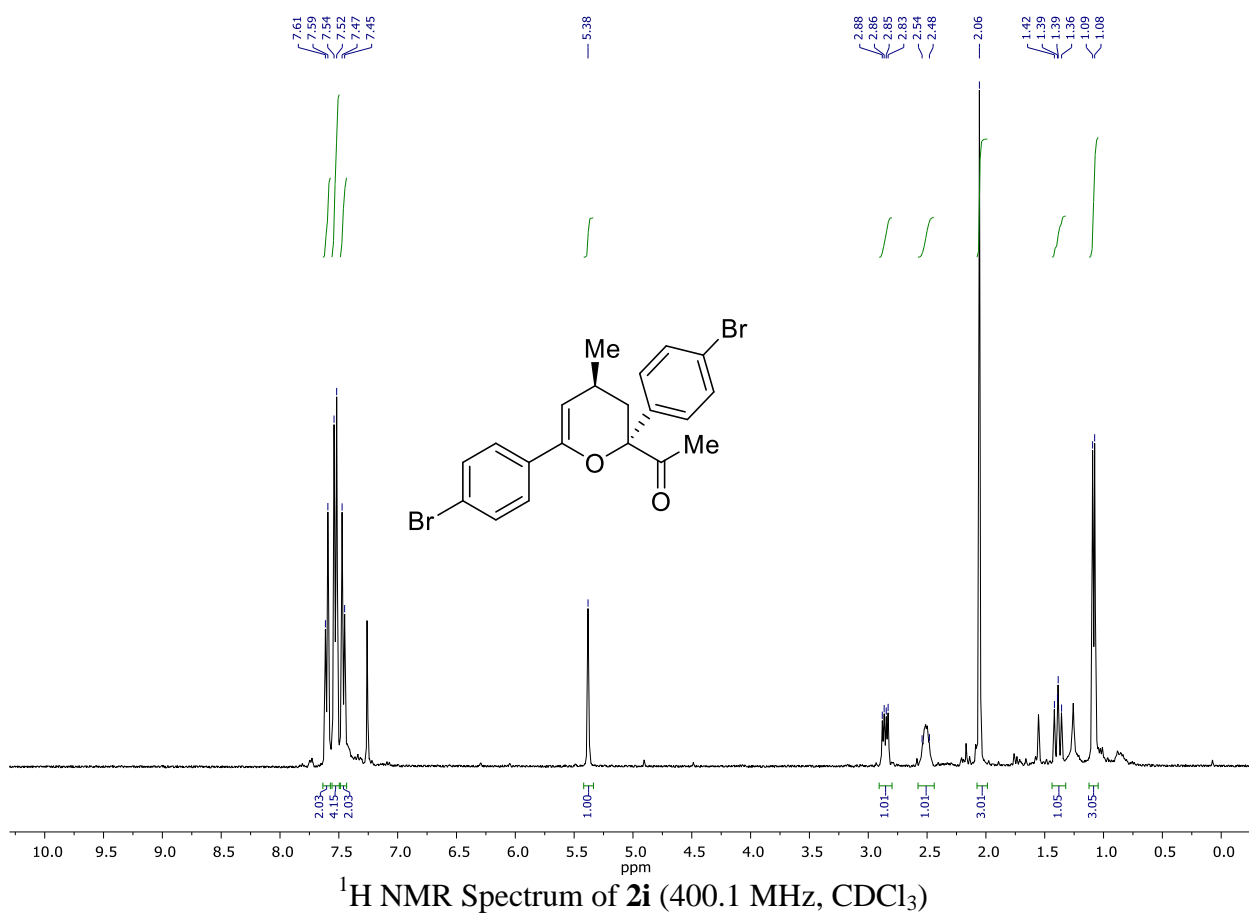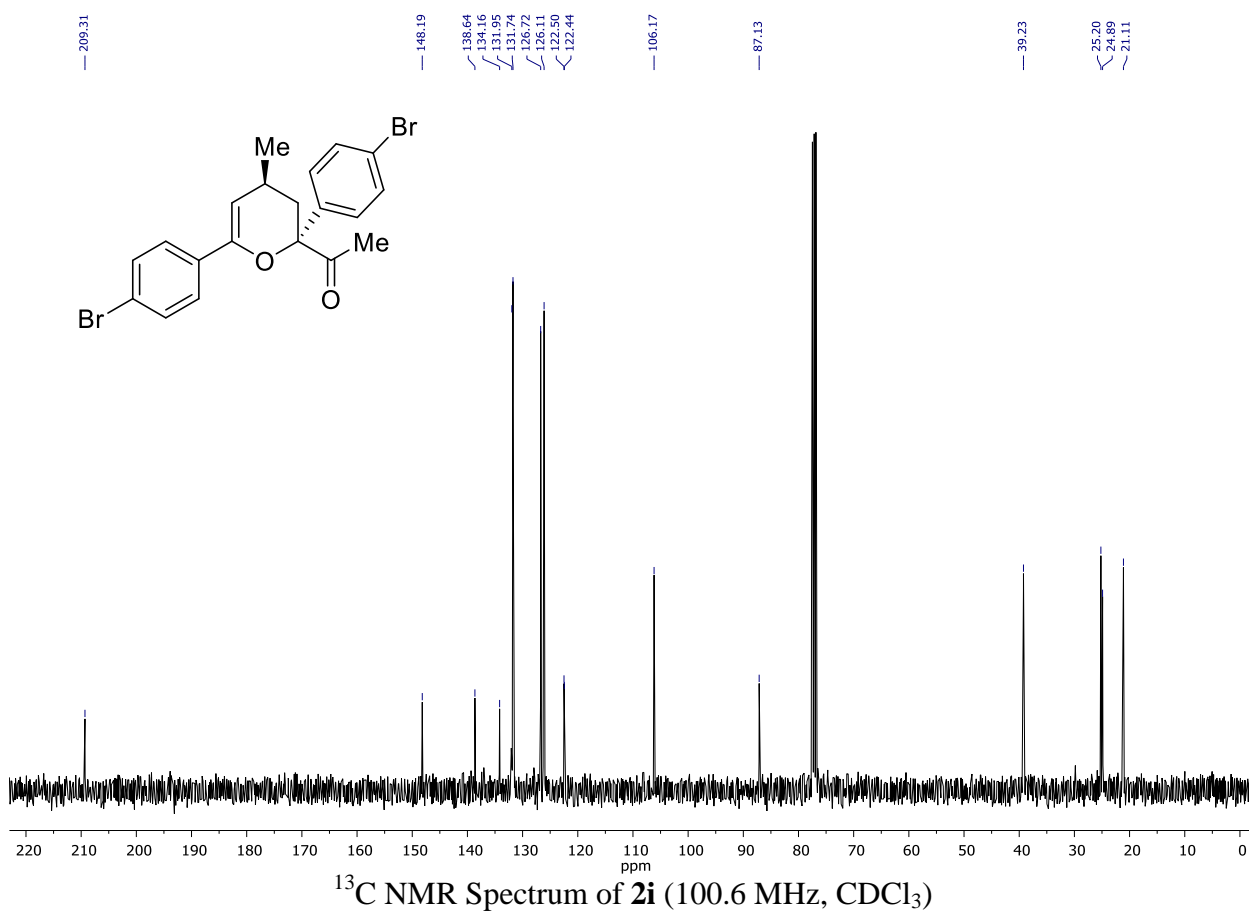

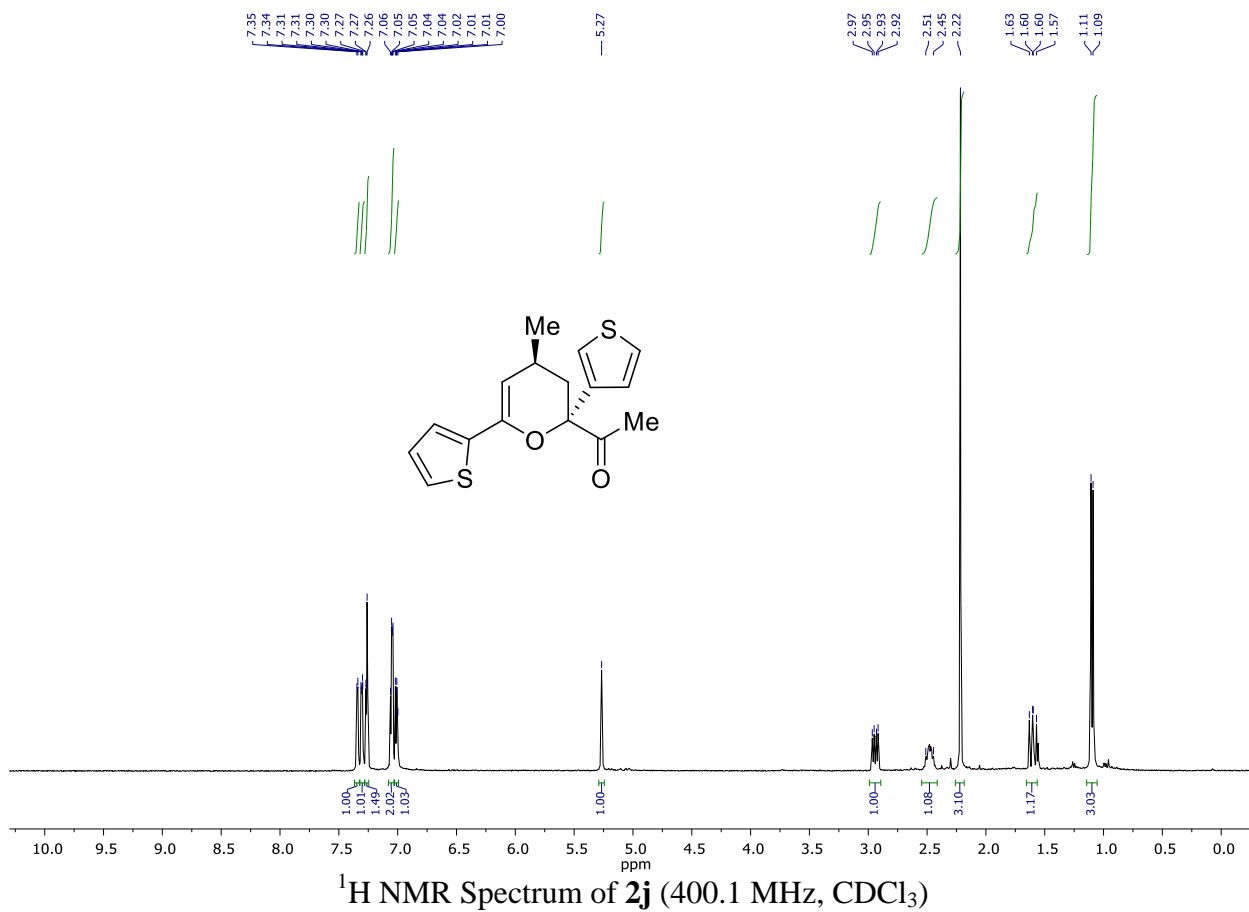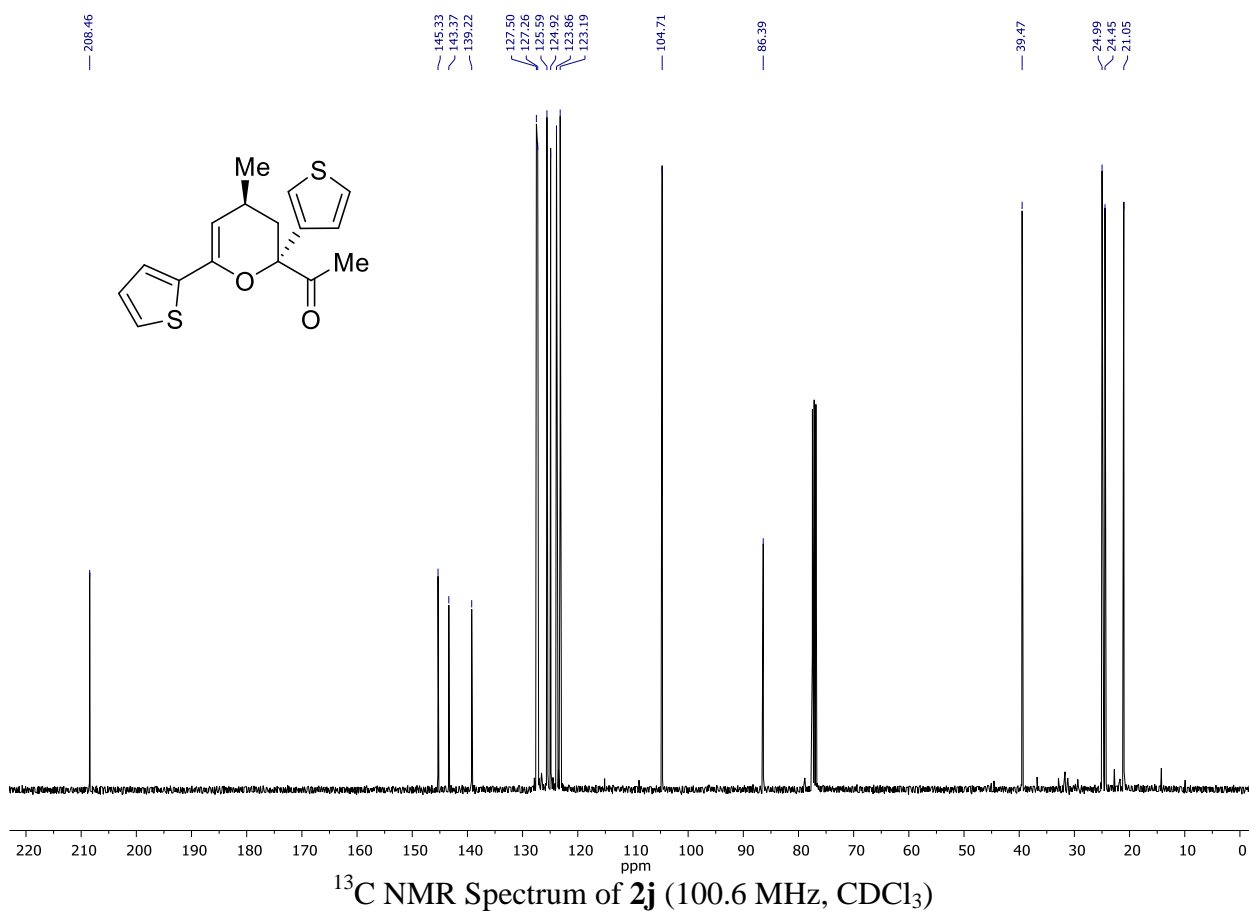

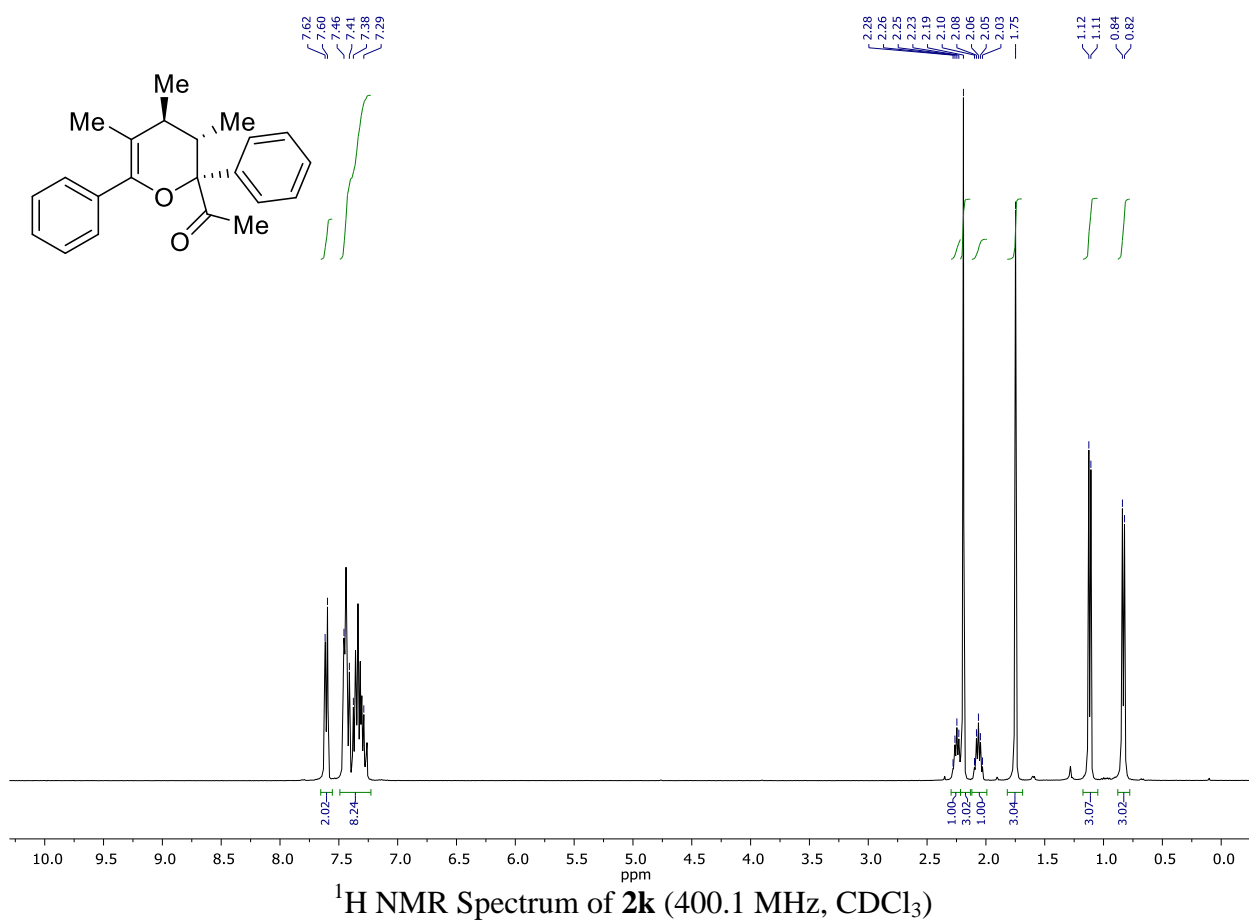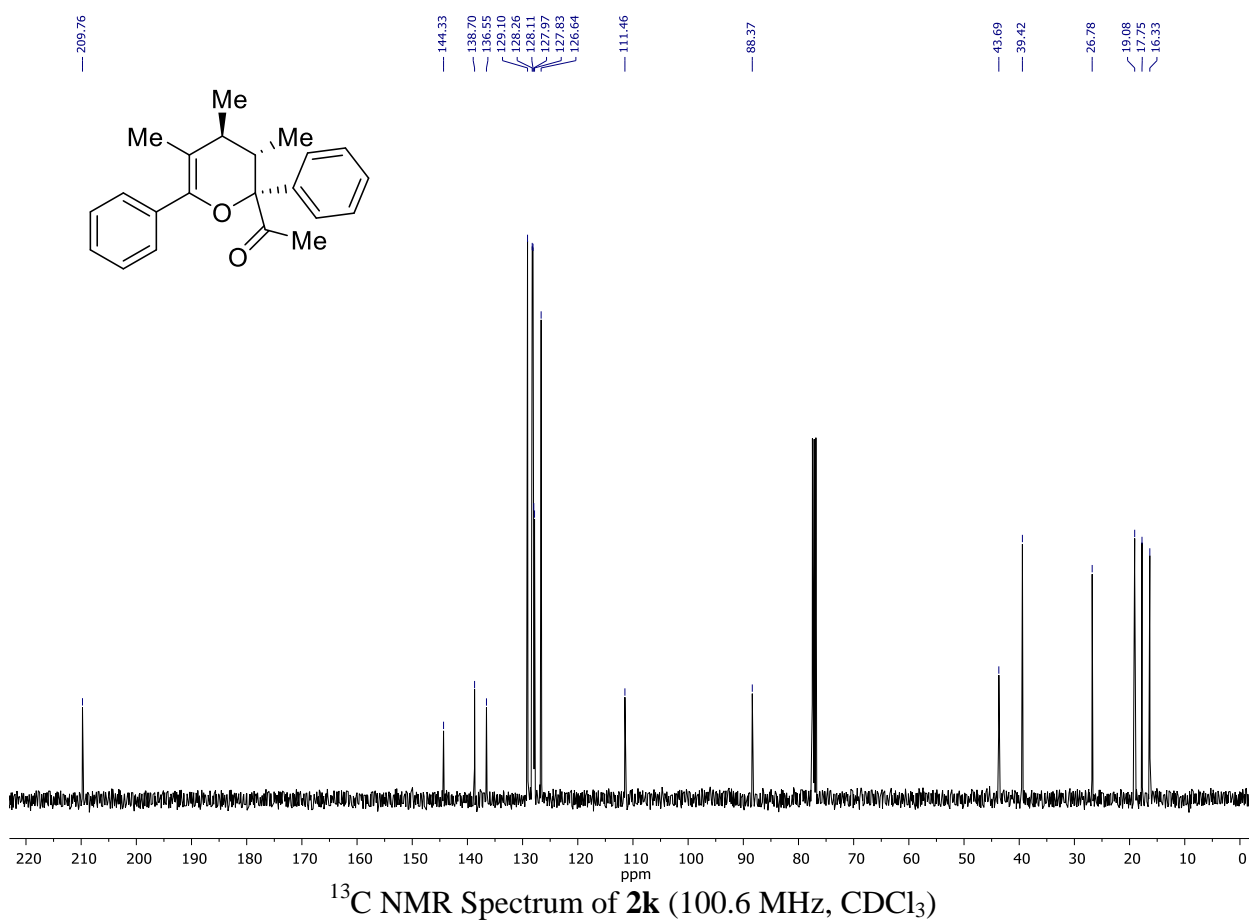



# $^1\text{H}$ and $^{13}\text{C}$ Spectra of acetylenic alcohol **4**

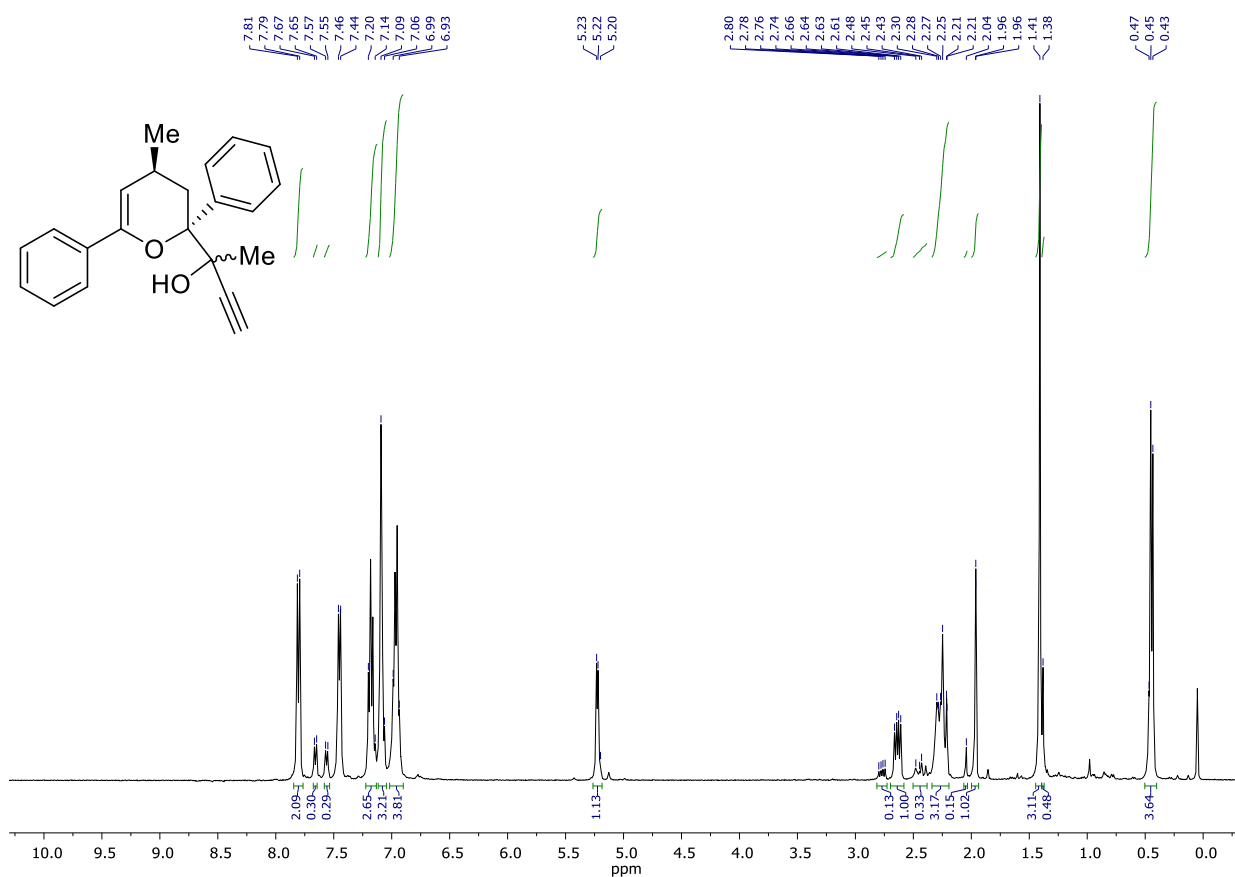

$^1\text{H}$  NMR Spectrum of **4aa** (400.1 MHz, benzene- $d_6$ )

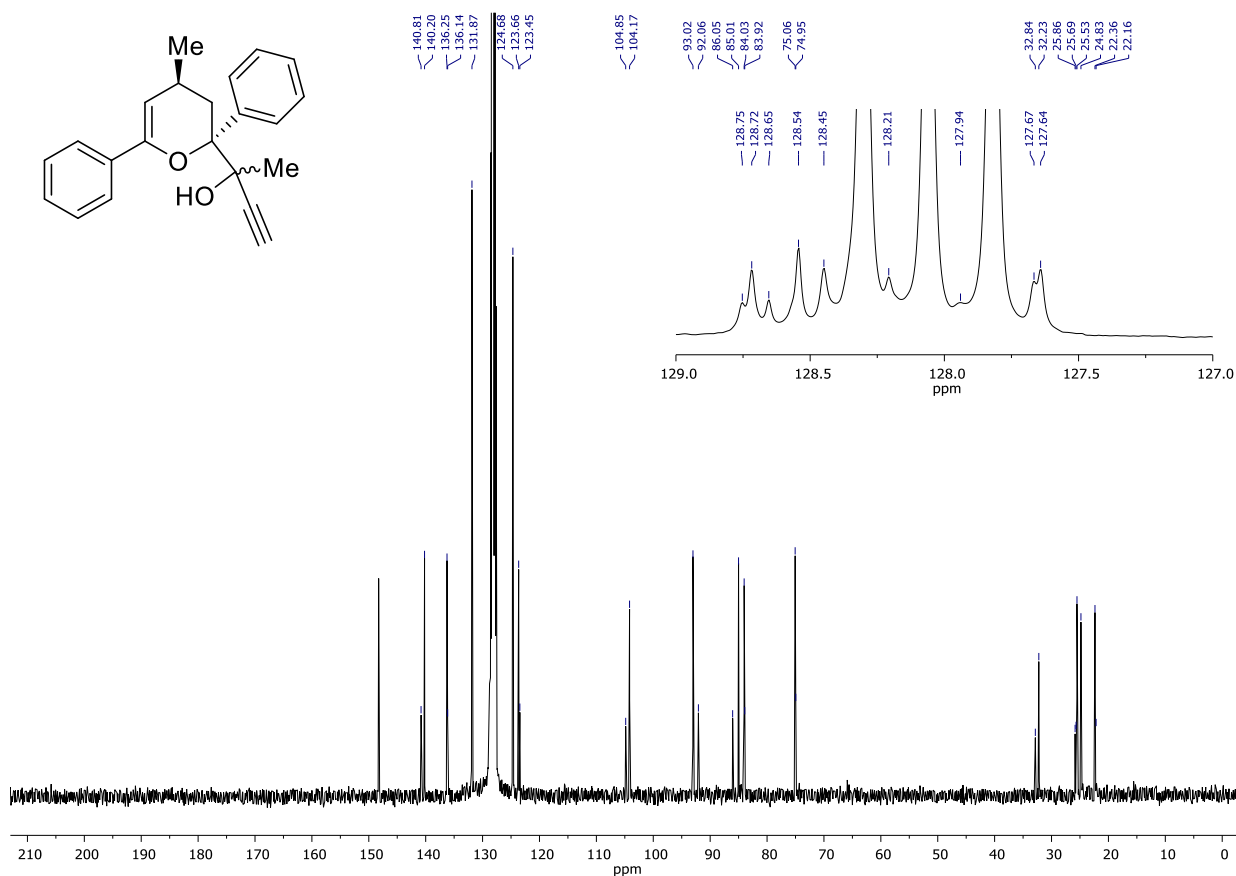

$^{13}\text{C}$  NMR Spectrum of **4aa** (100.6 MHz, benzene- $d_6$ )

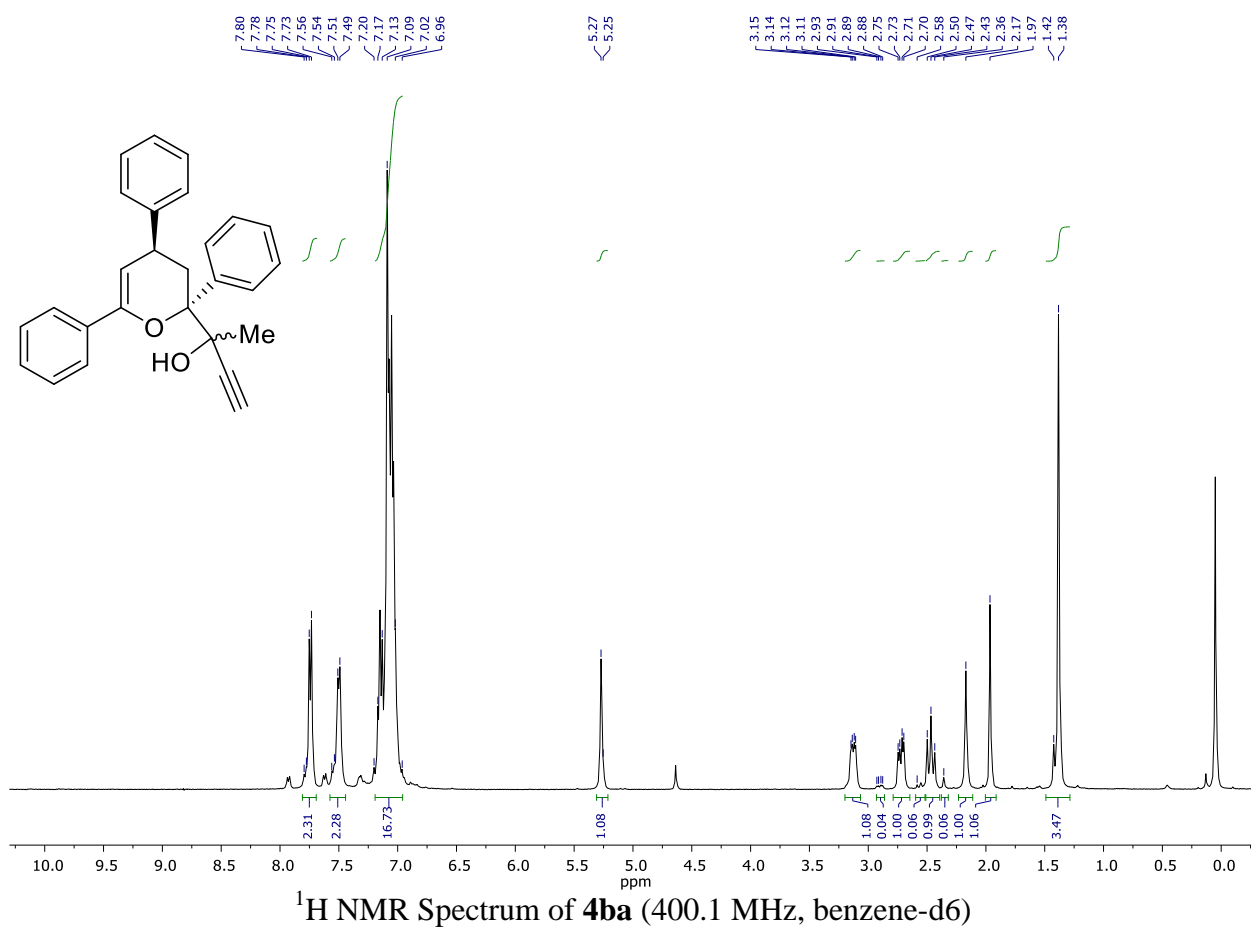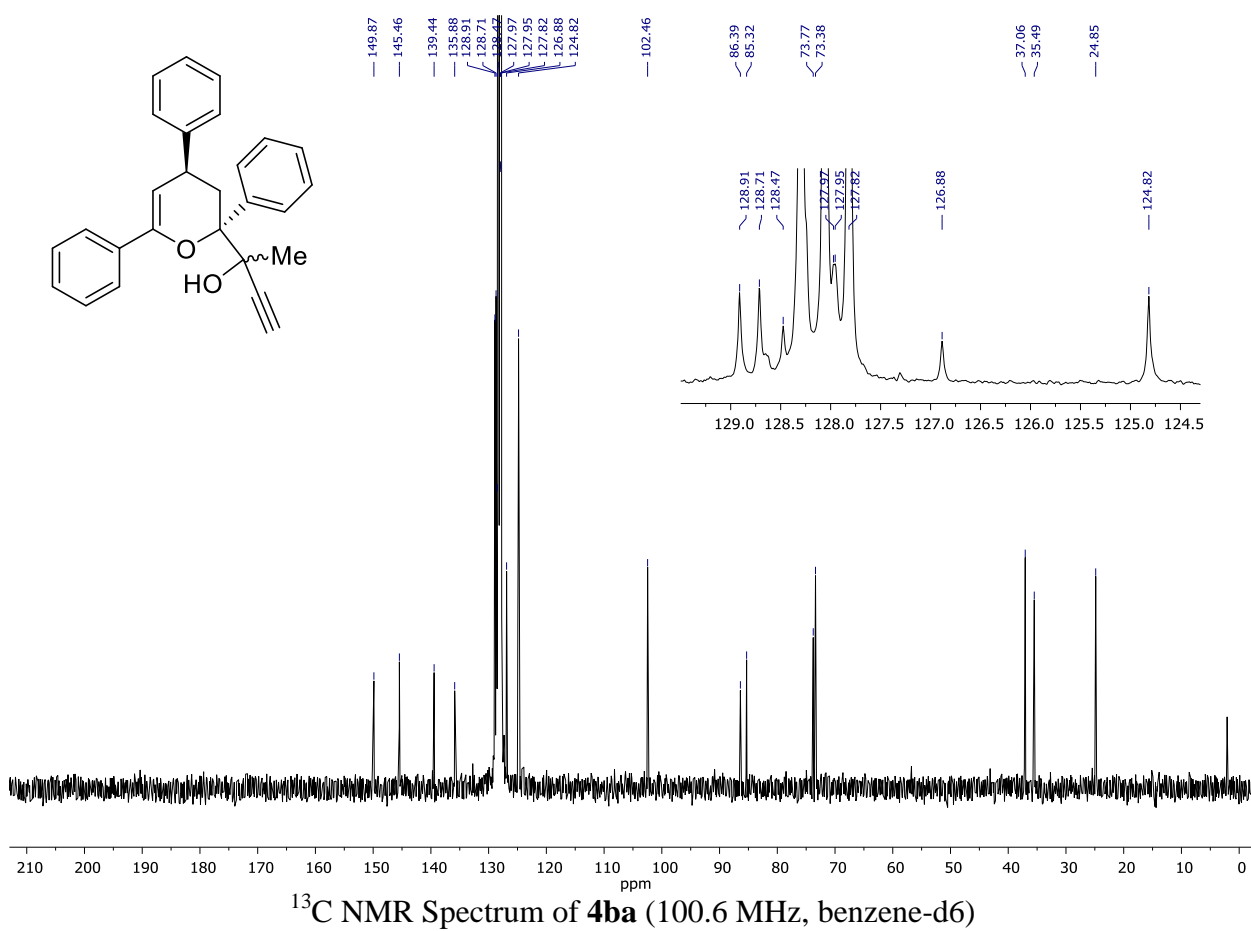

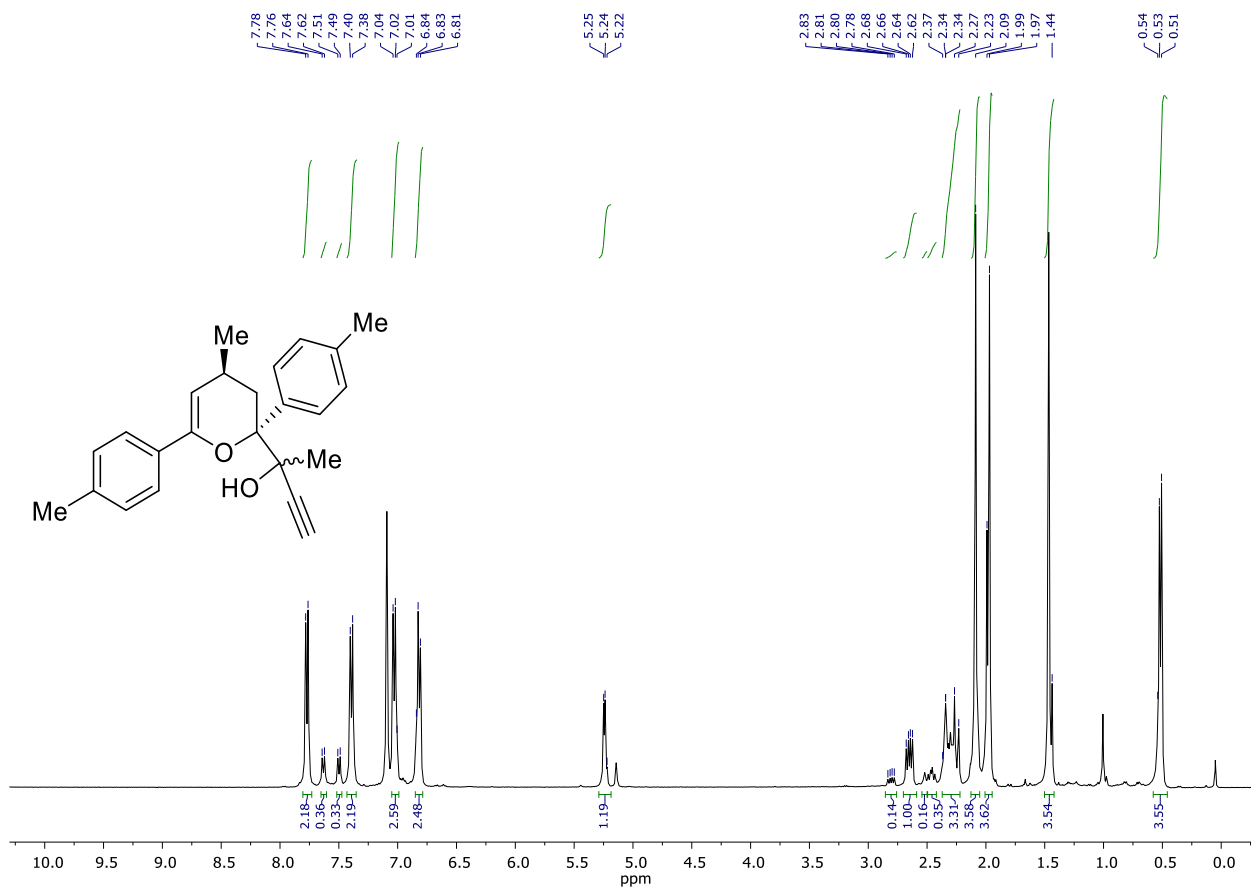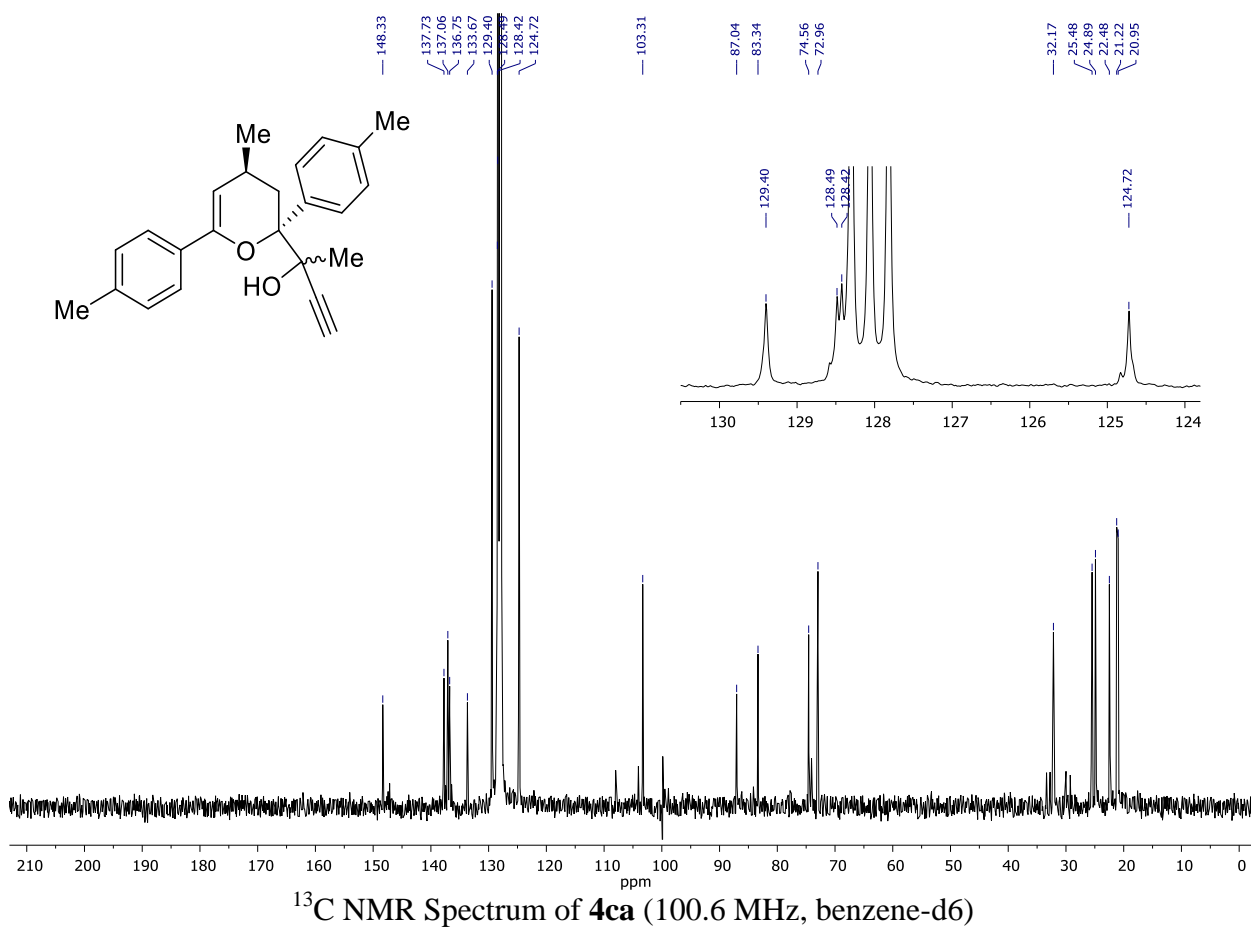

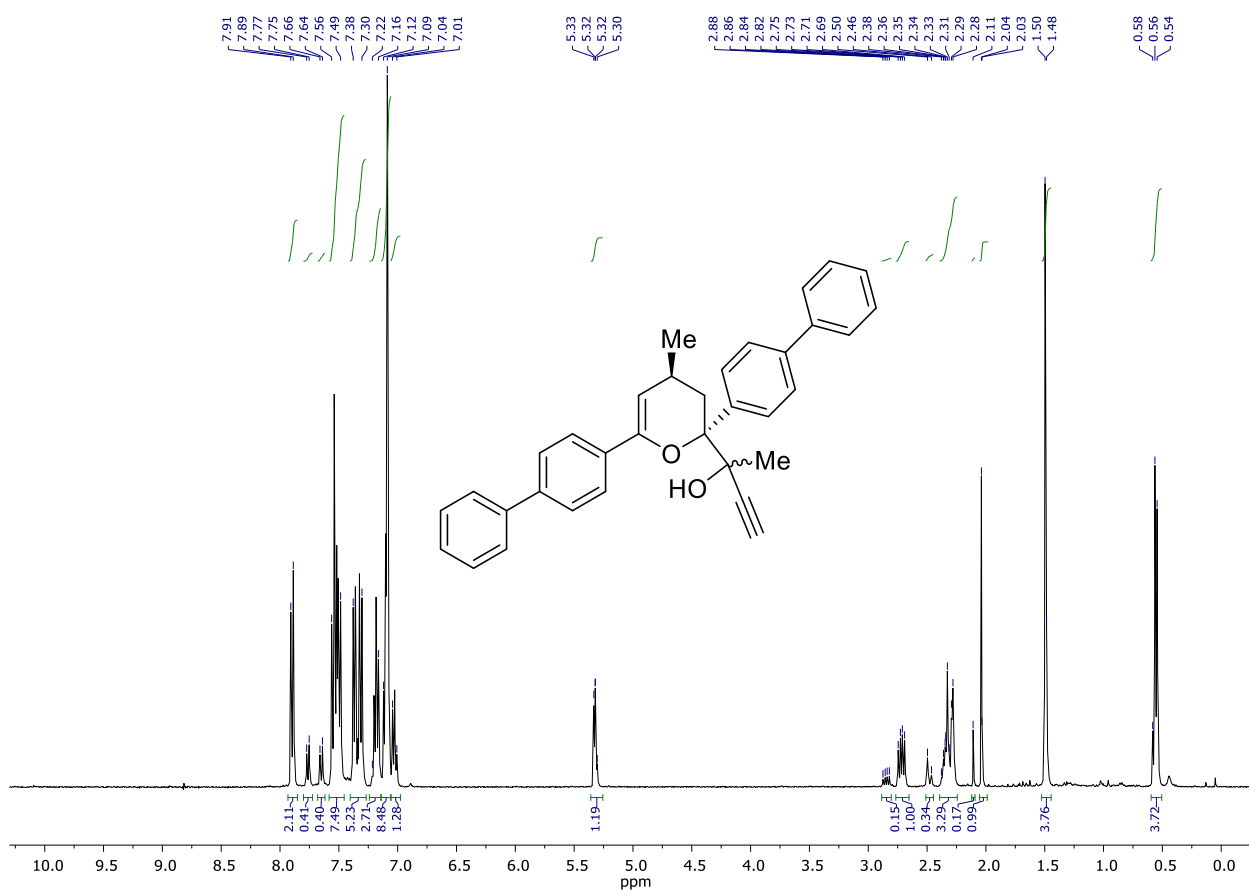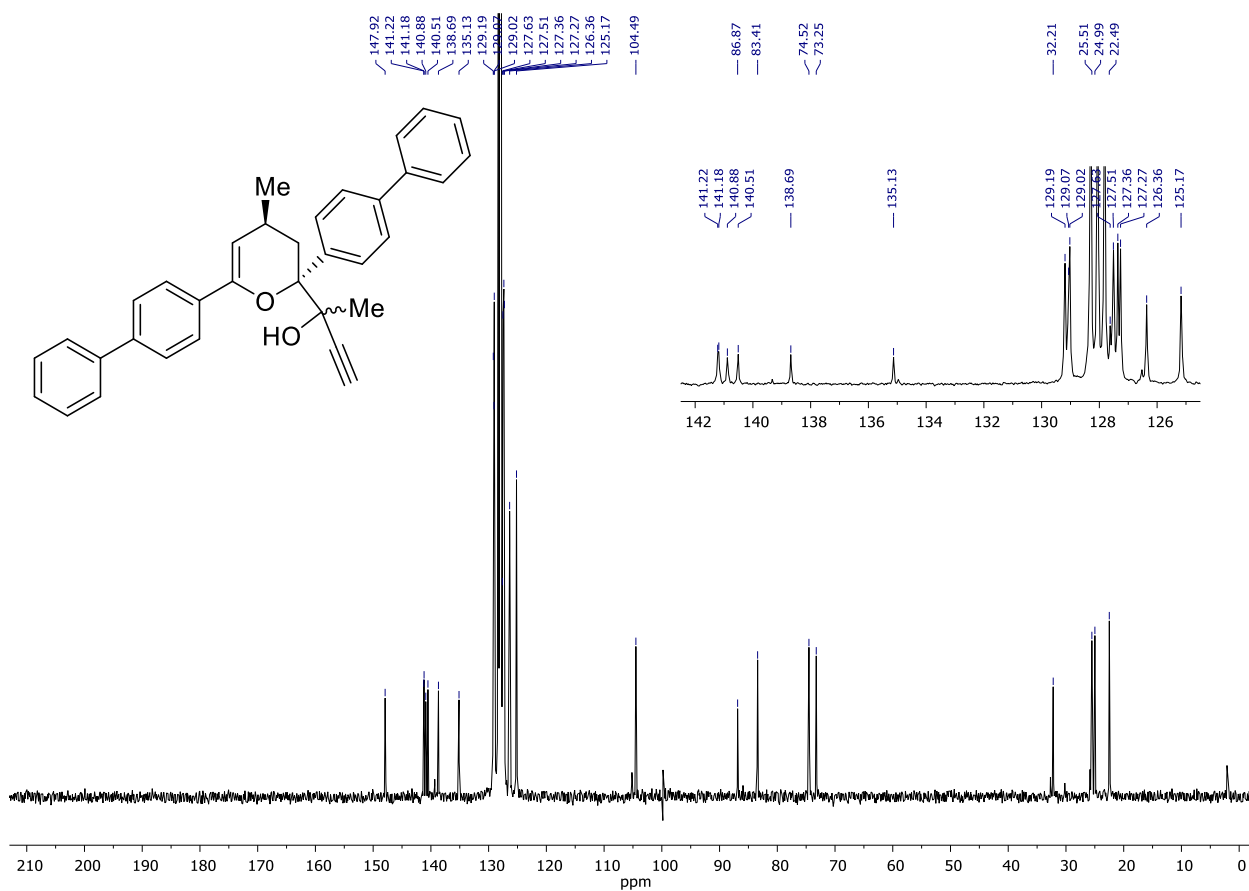



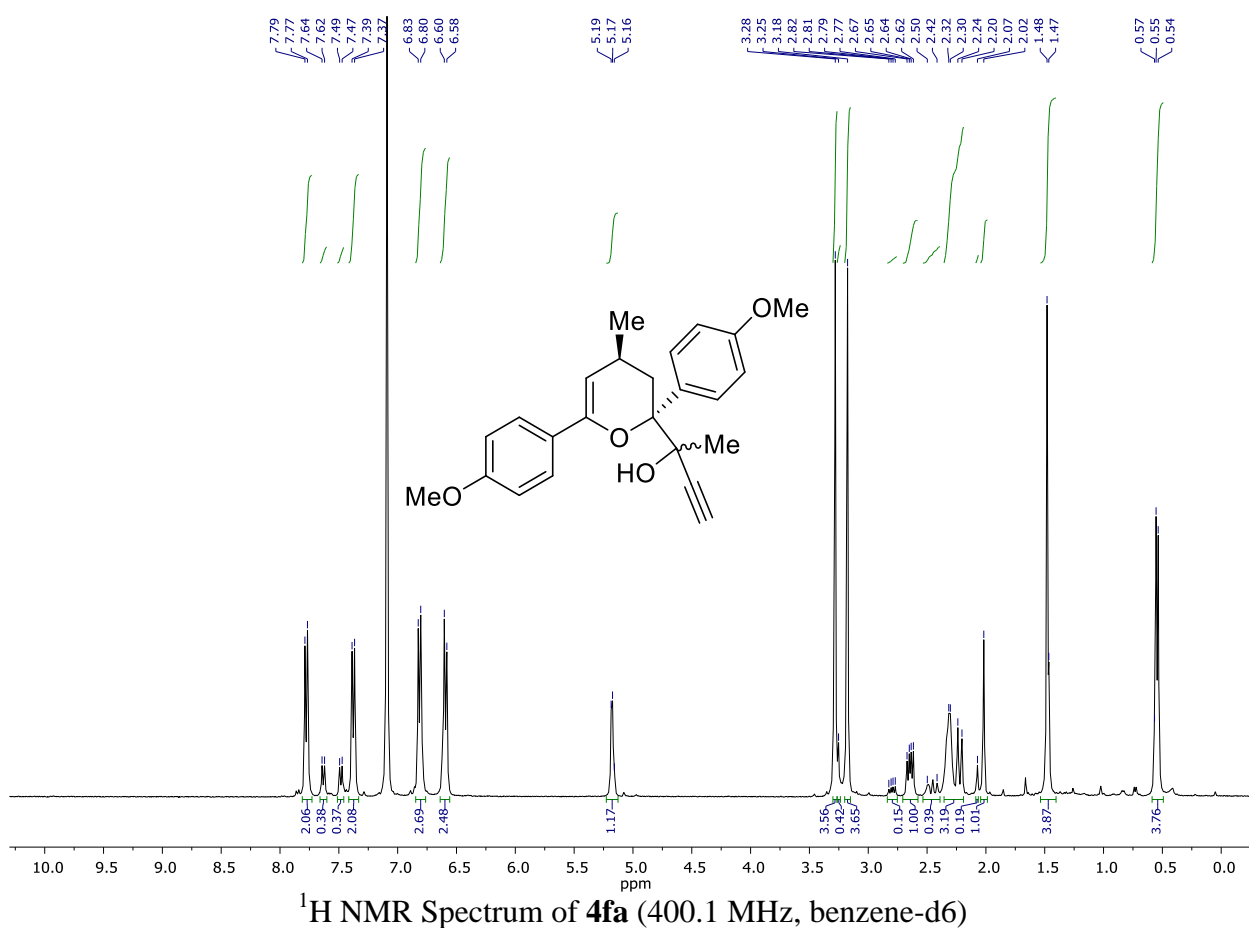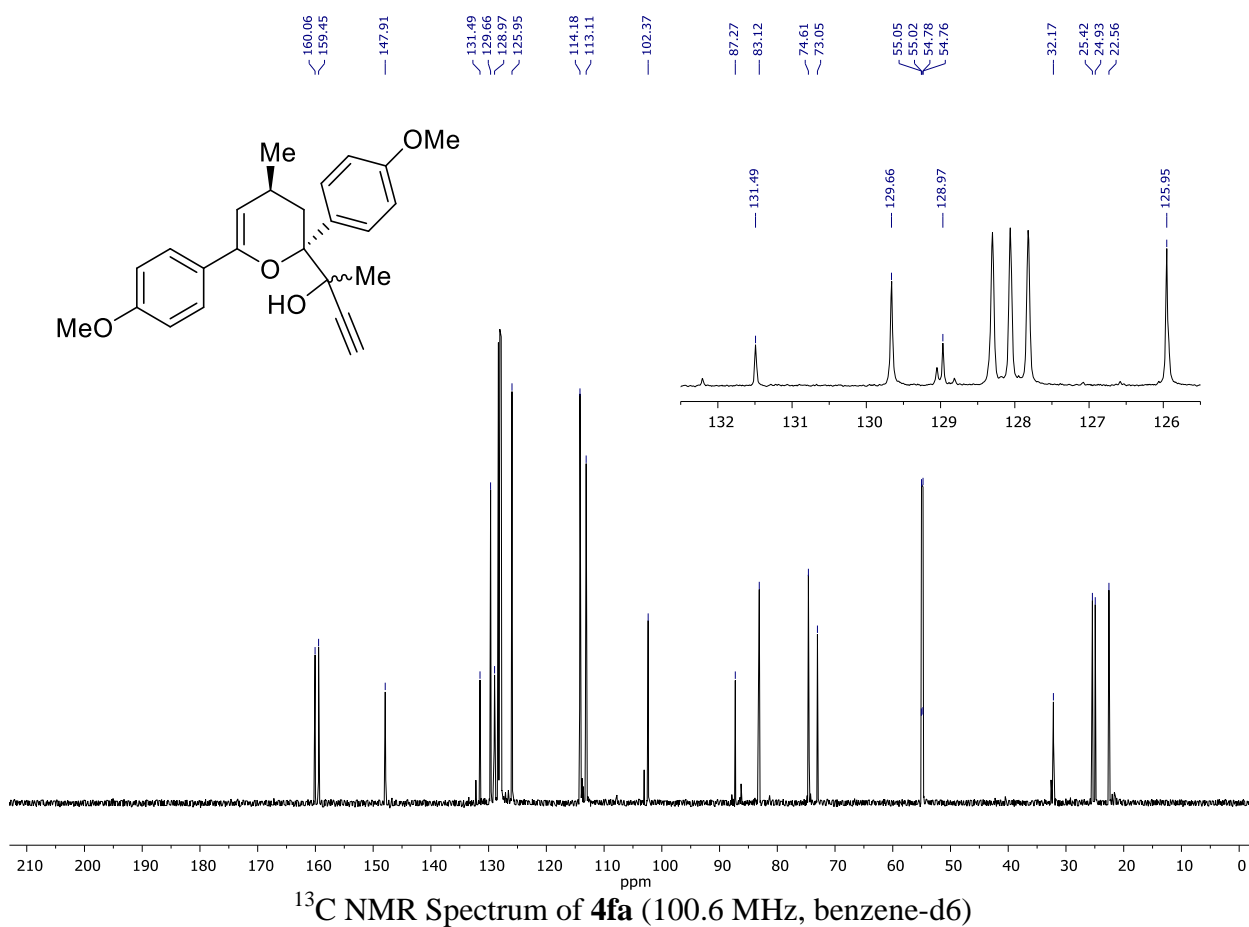

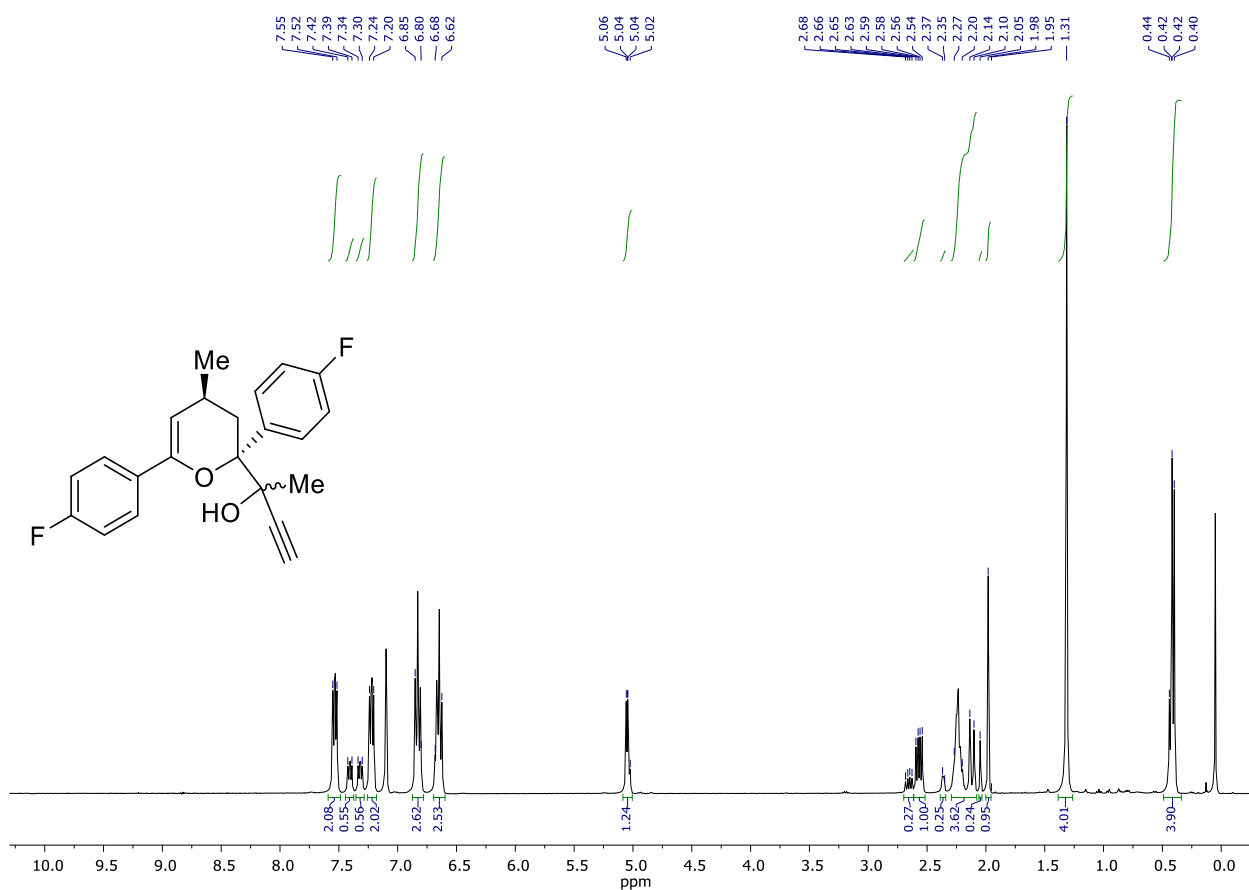

**<sup>1</sup>H NMR Spectrum of 4ga (400.1 MHz, benzene-d<sub>6</sub>)**

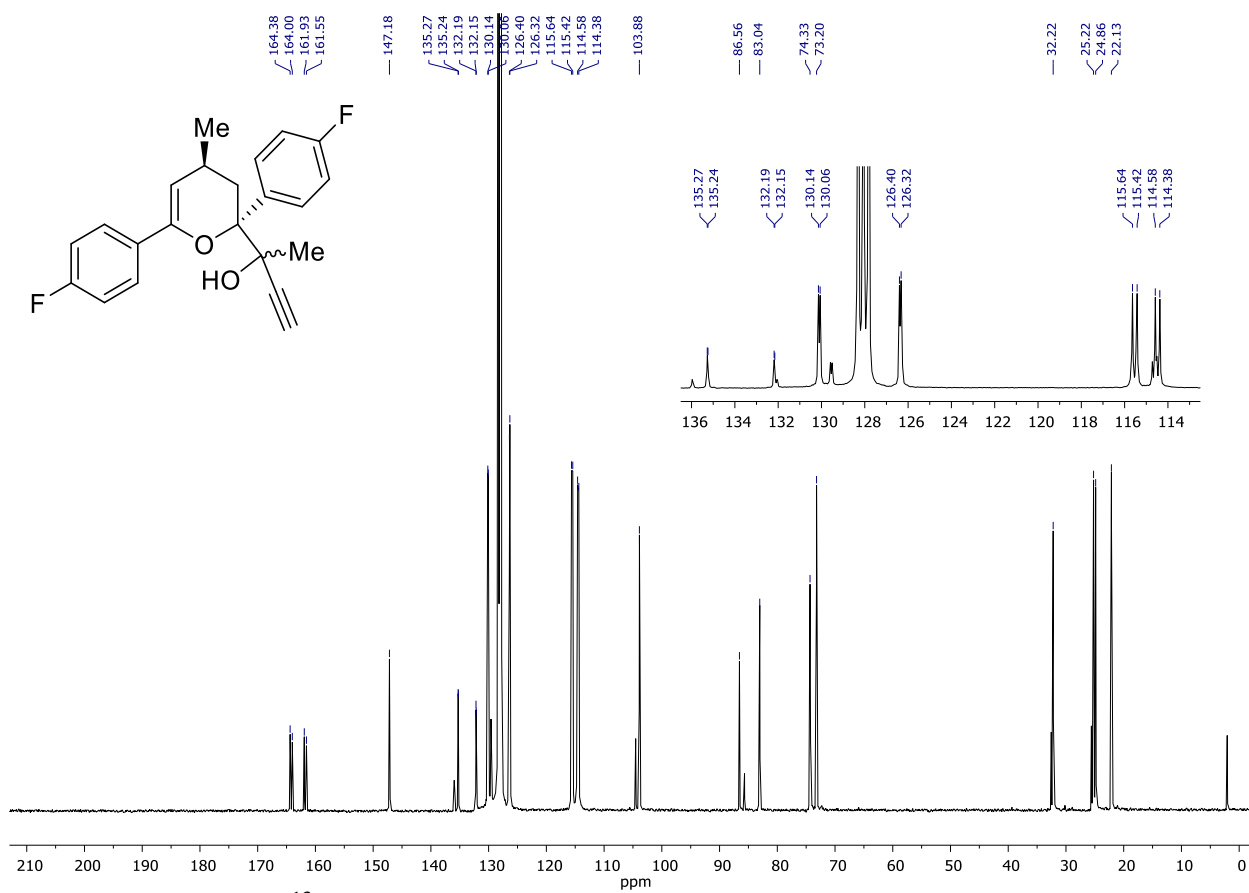

**<sup>13</sup>C NMR Spectrum of 4ga (100.6 MHz, benzene-d<sub>6</sub>)**

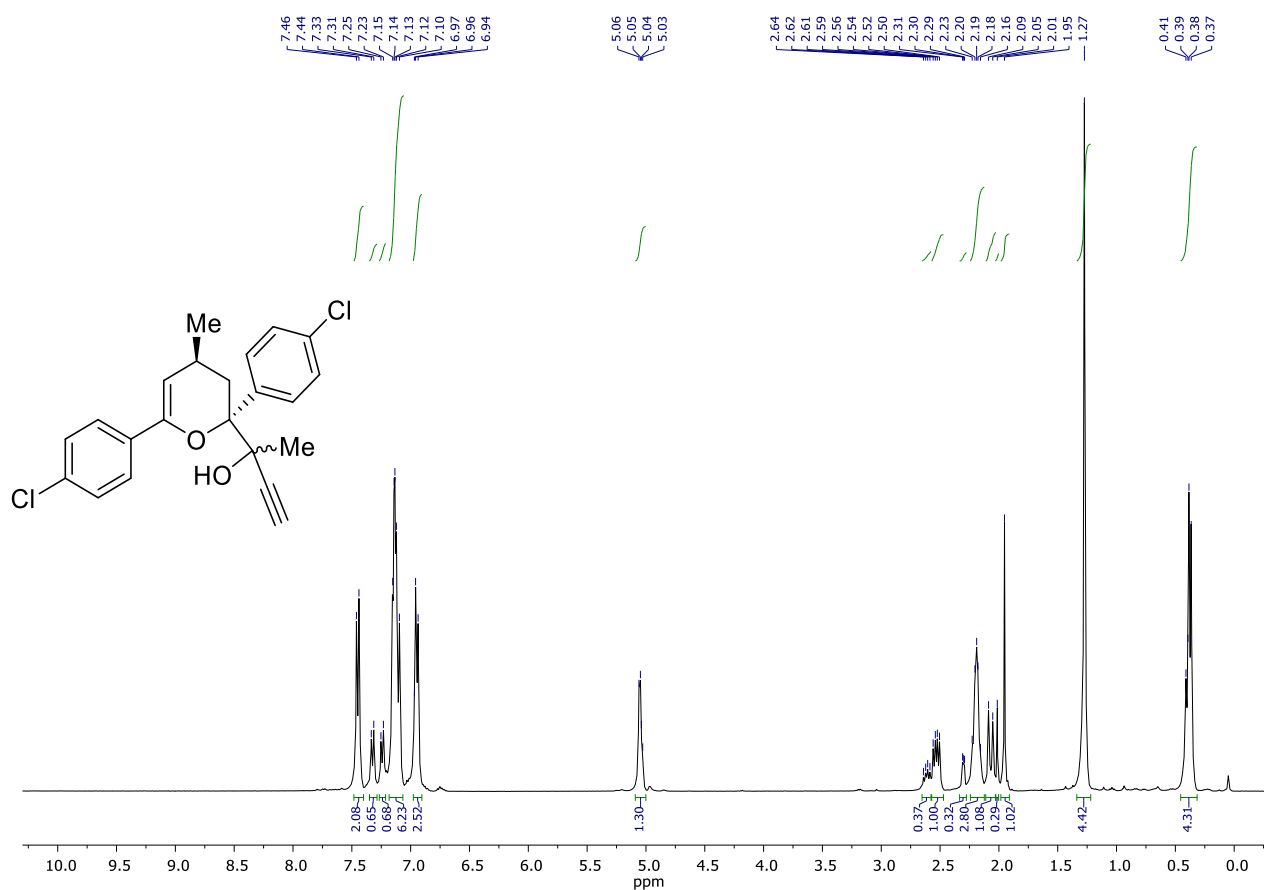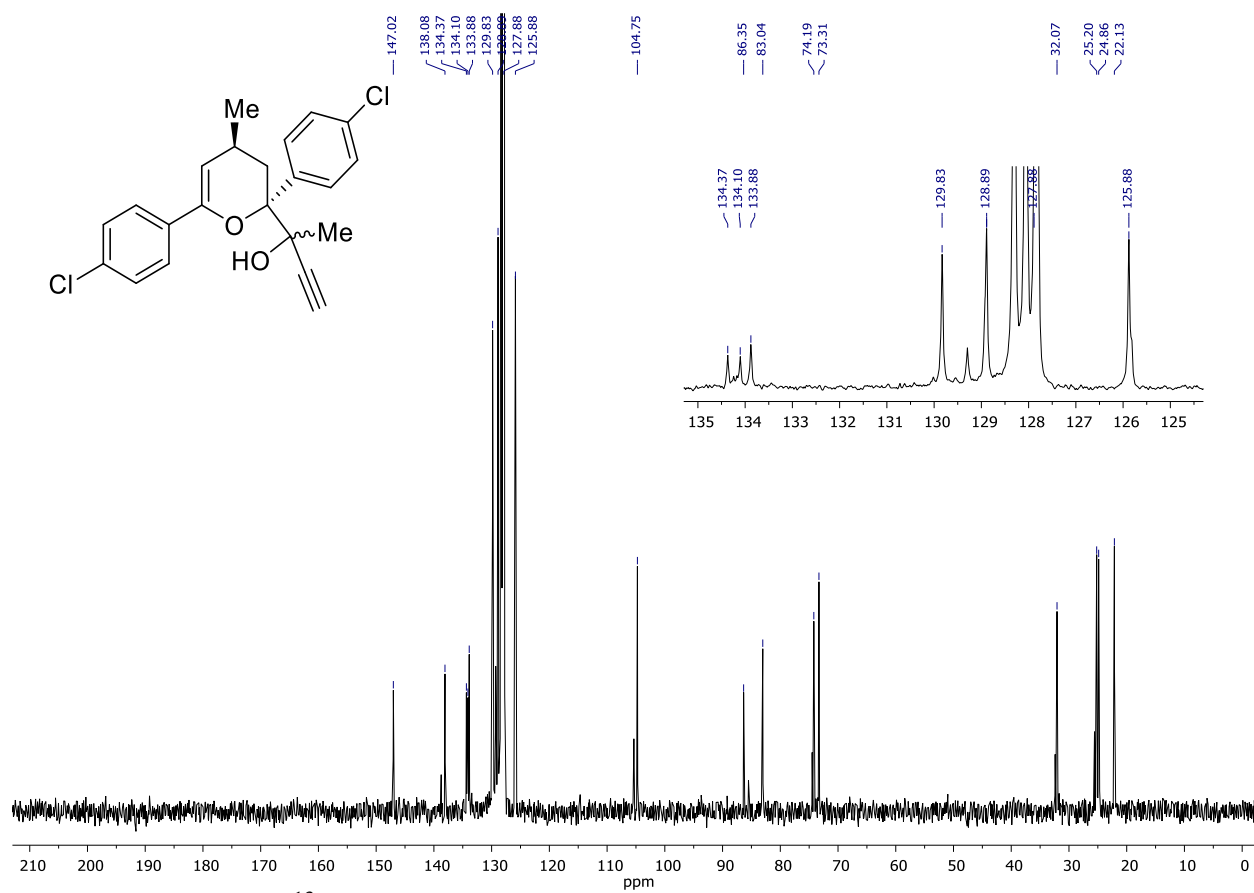



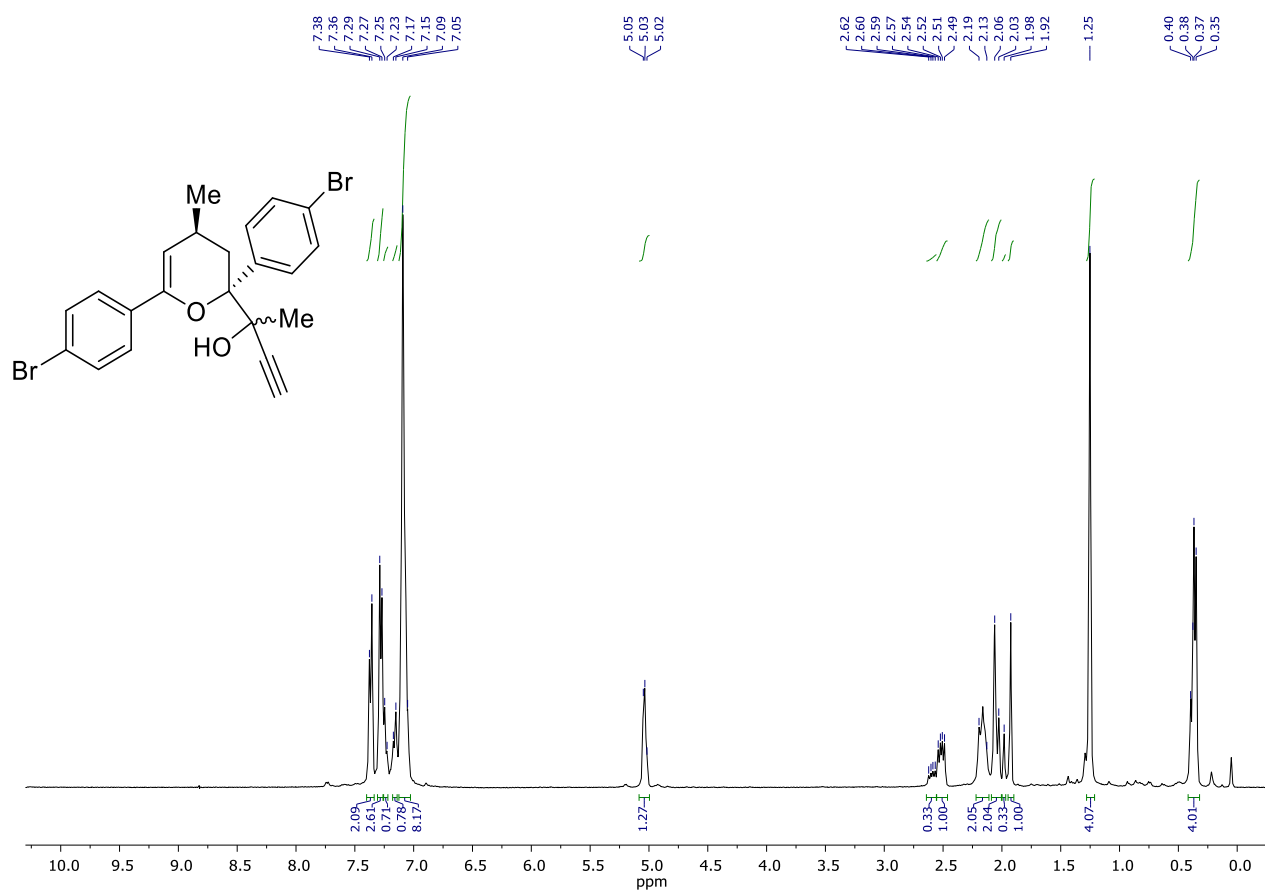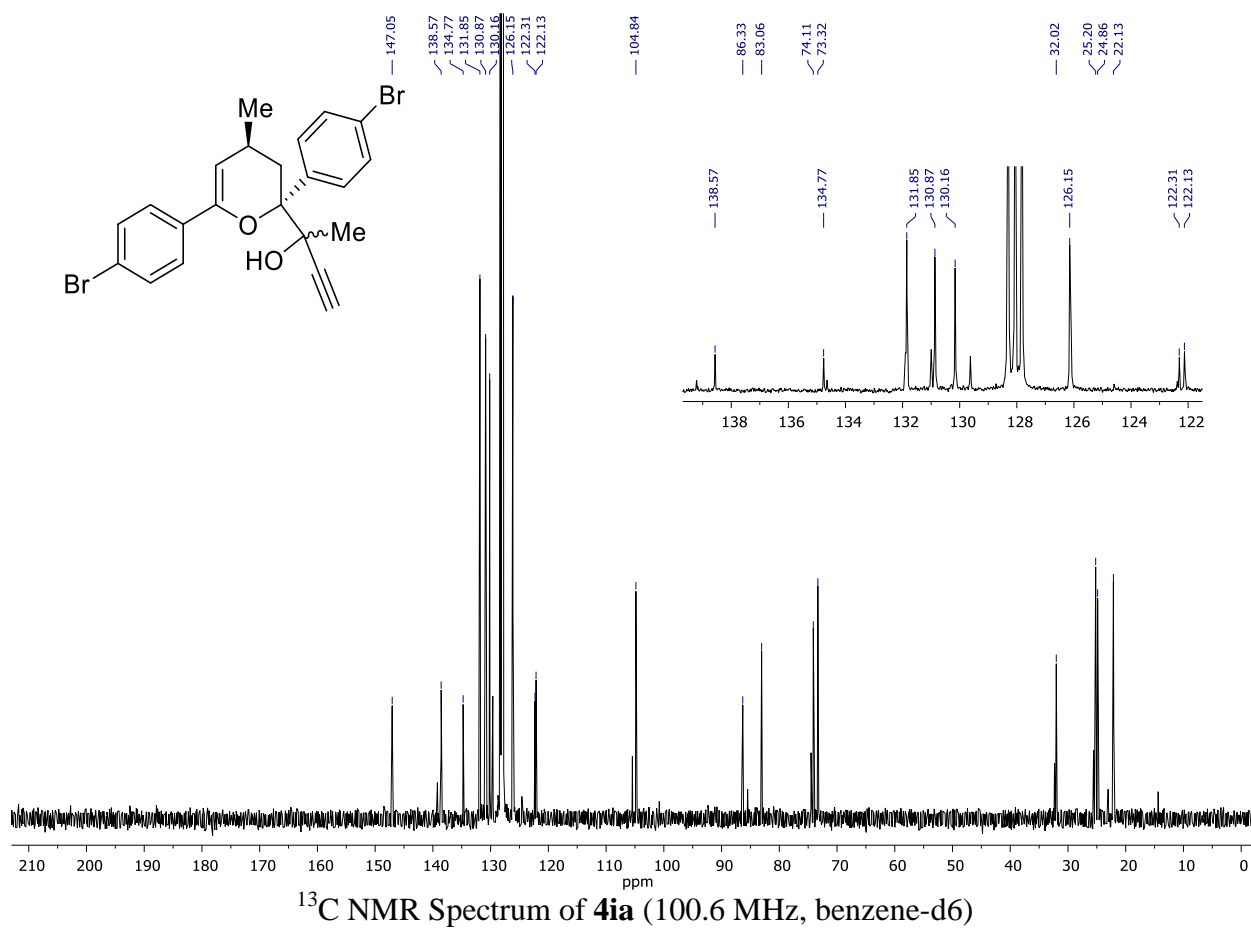

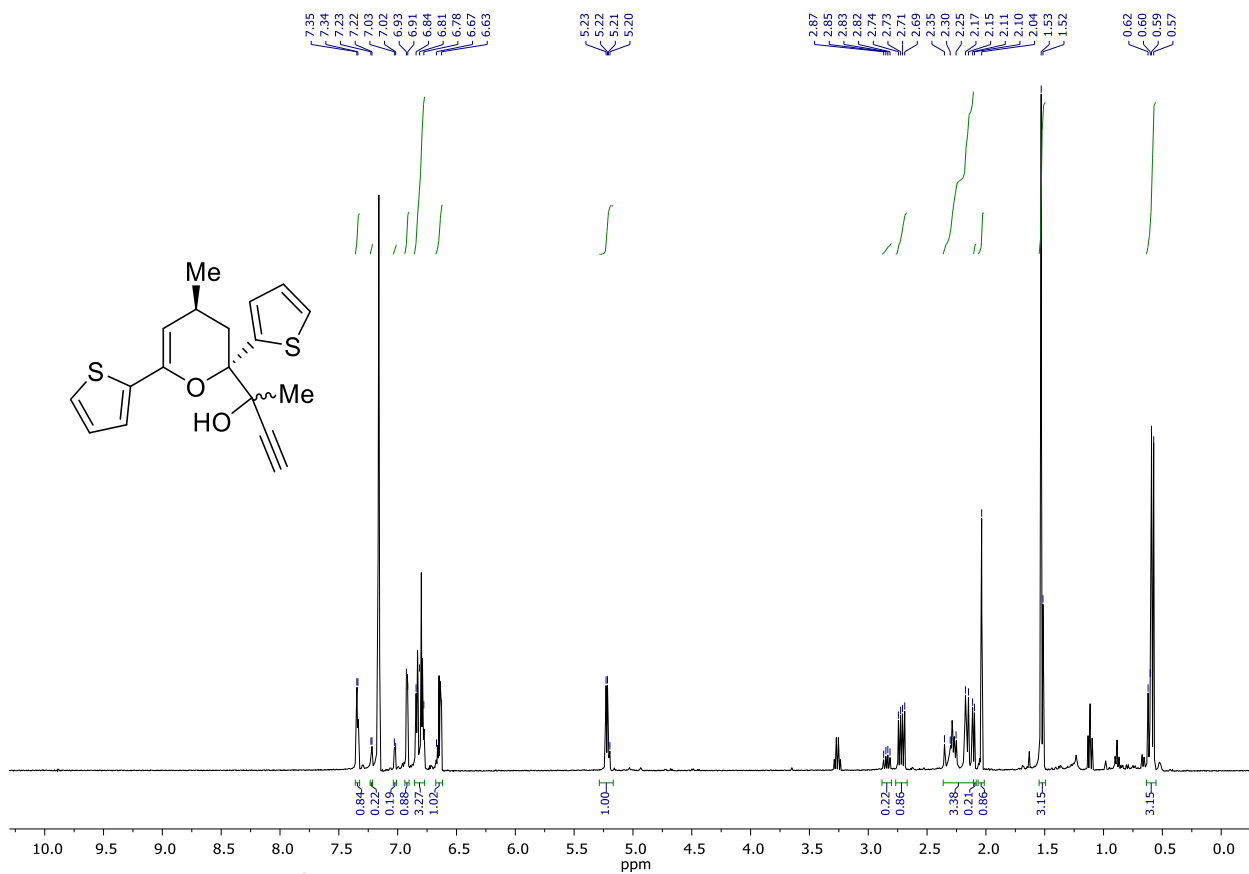

<sup>1</sup>H NMR Spectrum of **4ja** (400.1 MHz, benzene-d<sub>6</sub>)

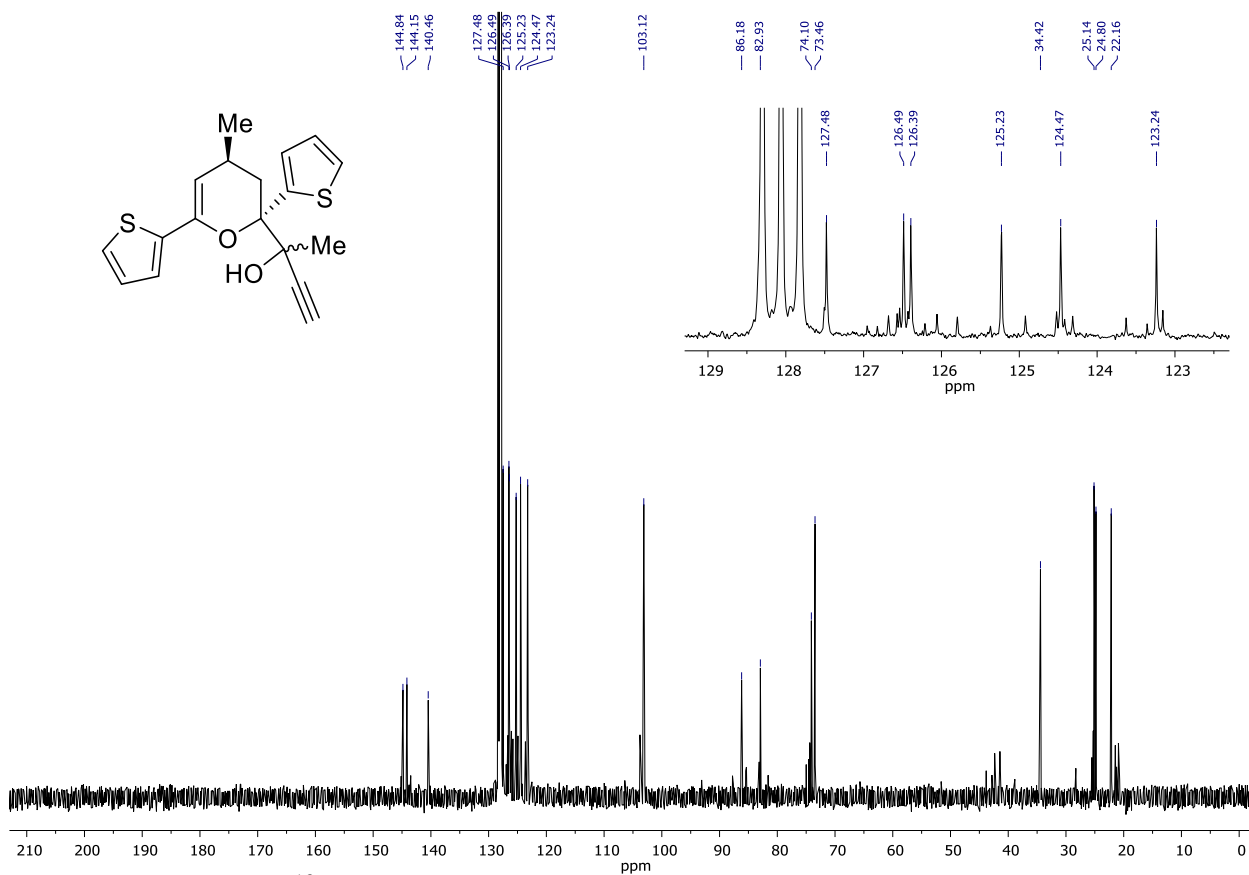

<sup>13</sup>C NMR Spectrum of **4ja** (100.6 MHz, benzene-d<sub>6</sub>)

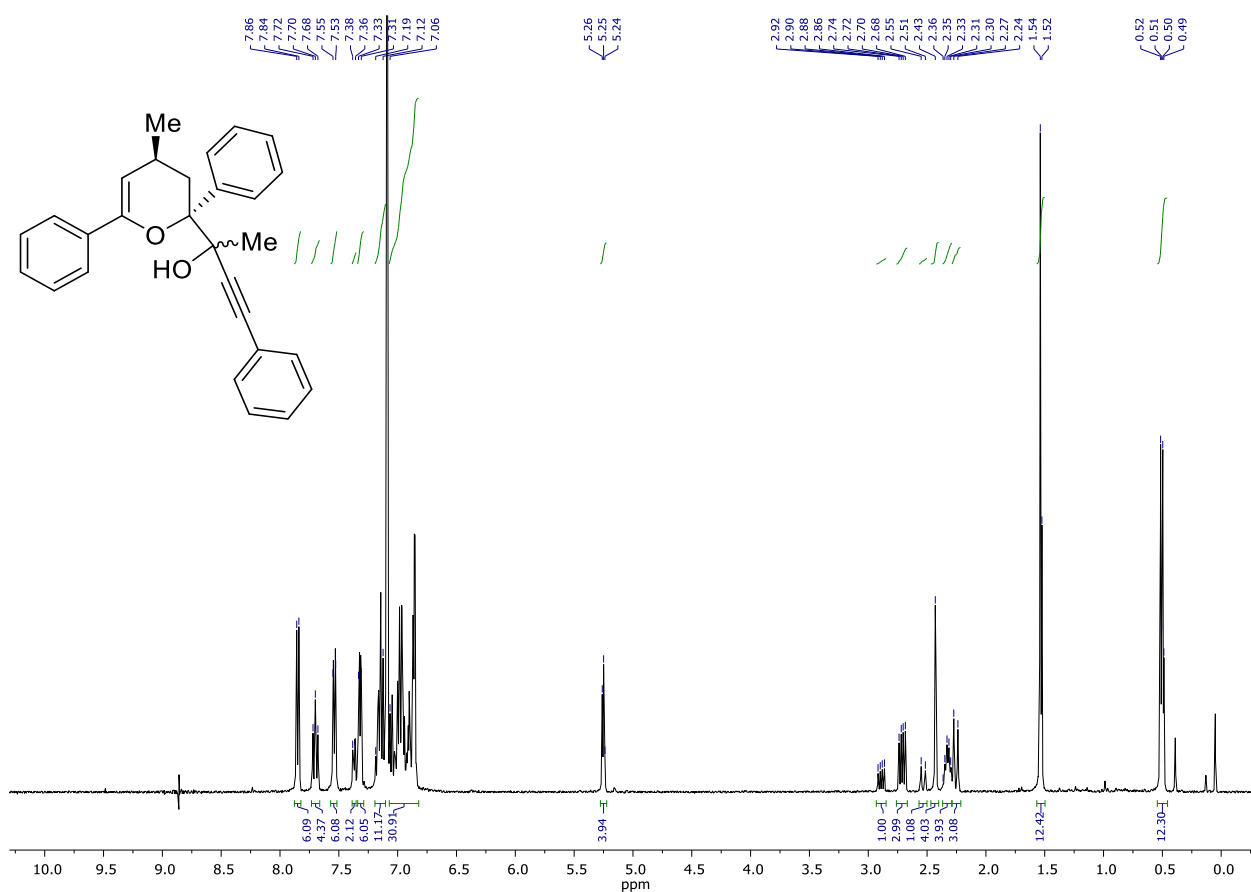

<sup>1</sup>H NMR Spectrum of **4ab** (400.1 MHz, benzene-d<sub>6</sub>)

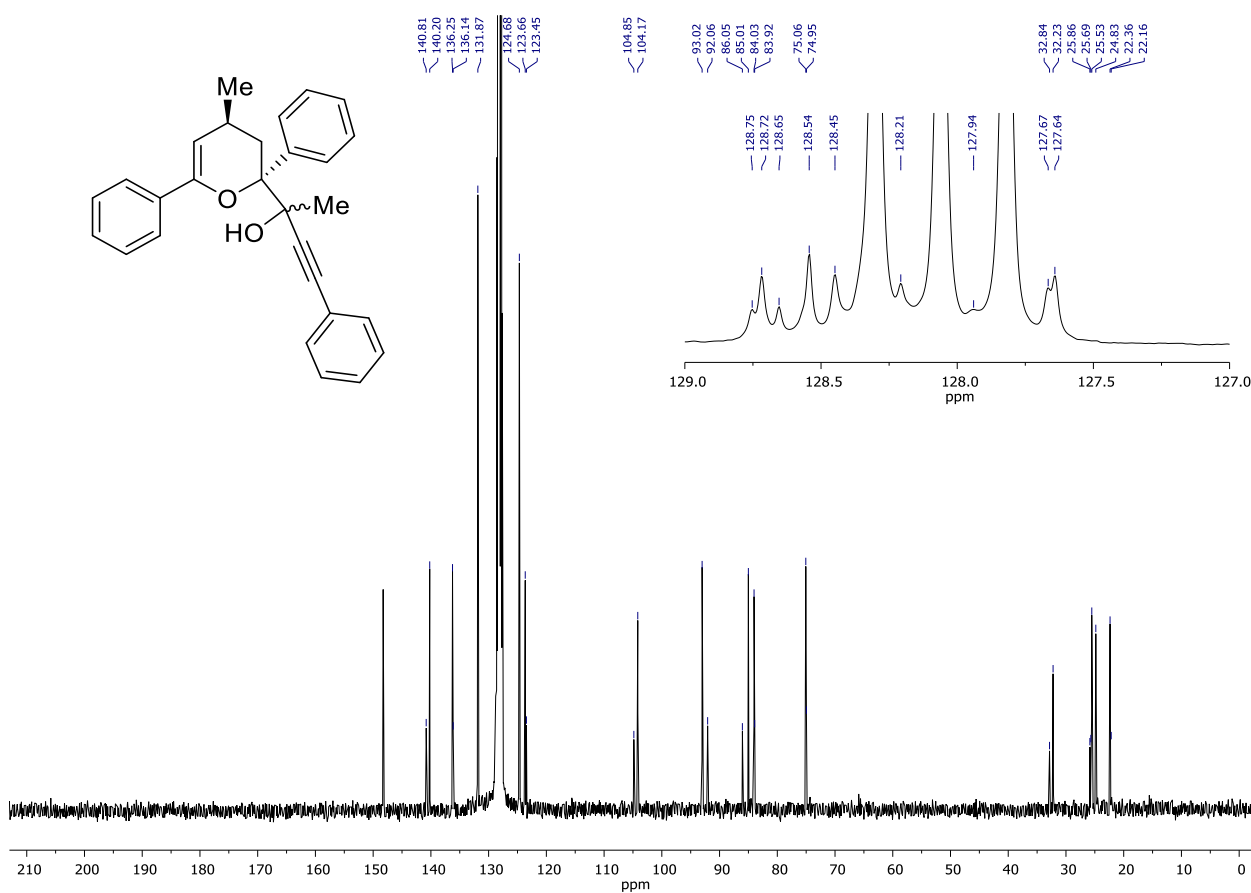

<sup>13</sup>C NMR Spectrum of **4ab** (100.6 MHz, benzene-d<sub>6</sub>)



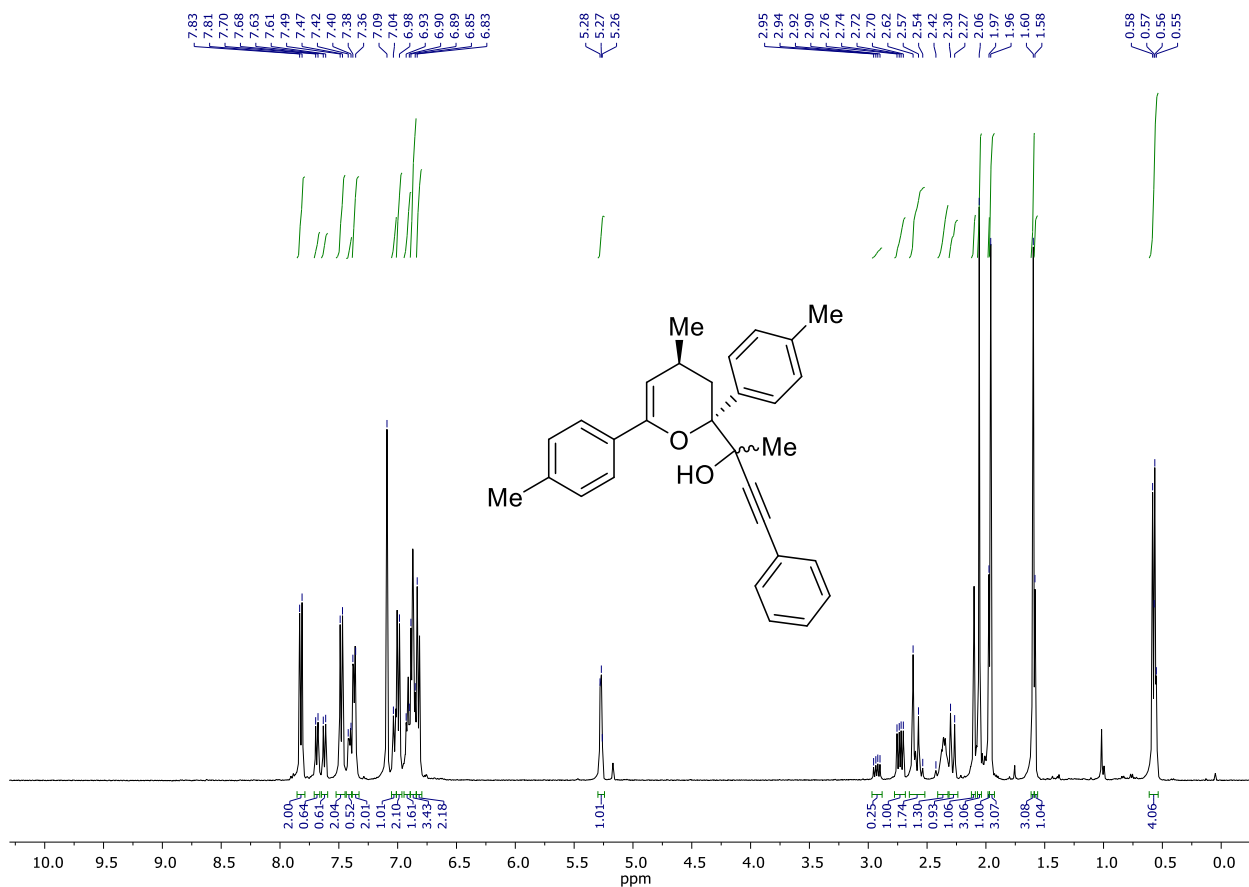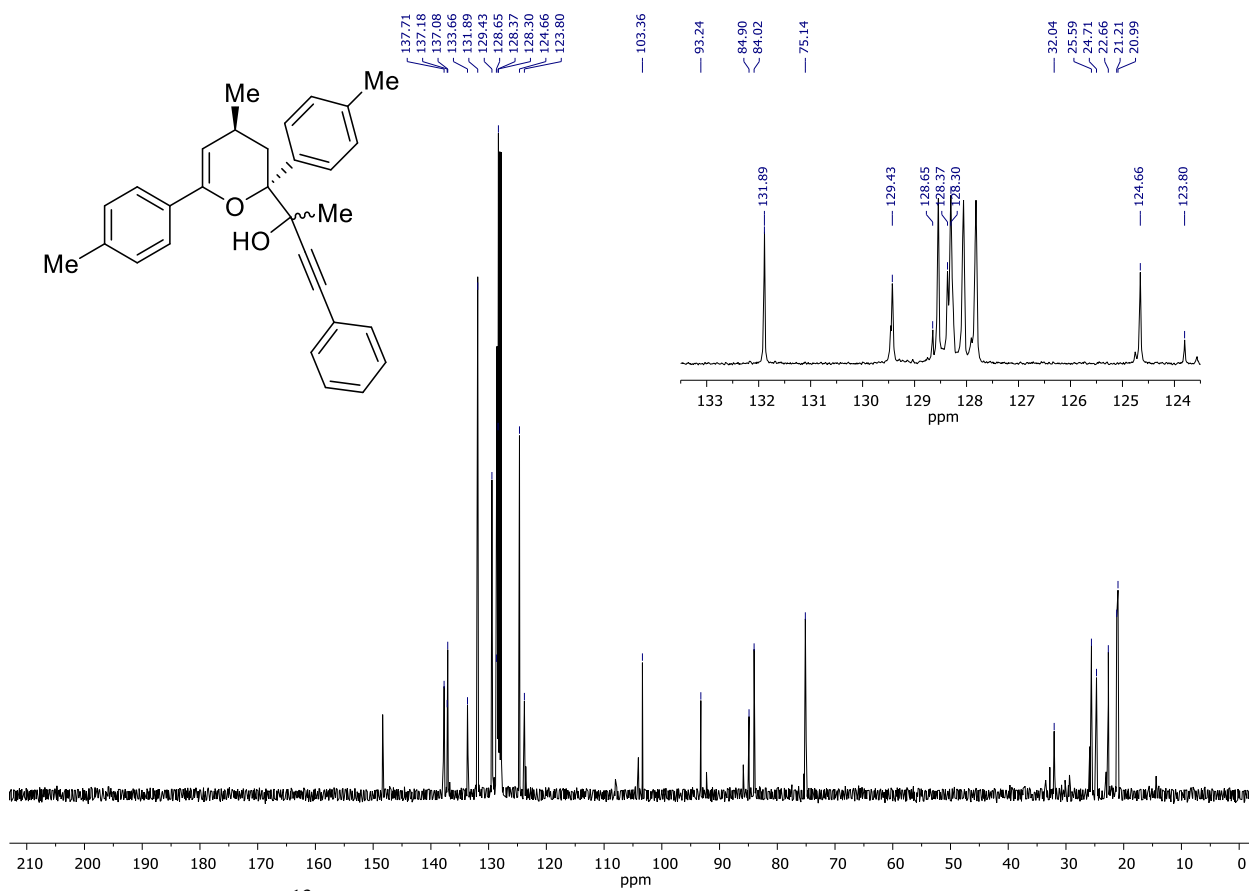

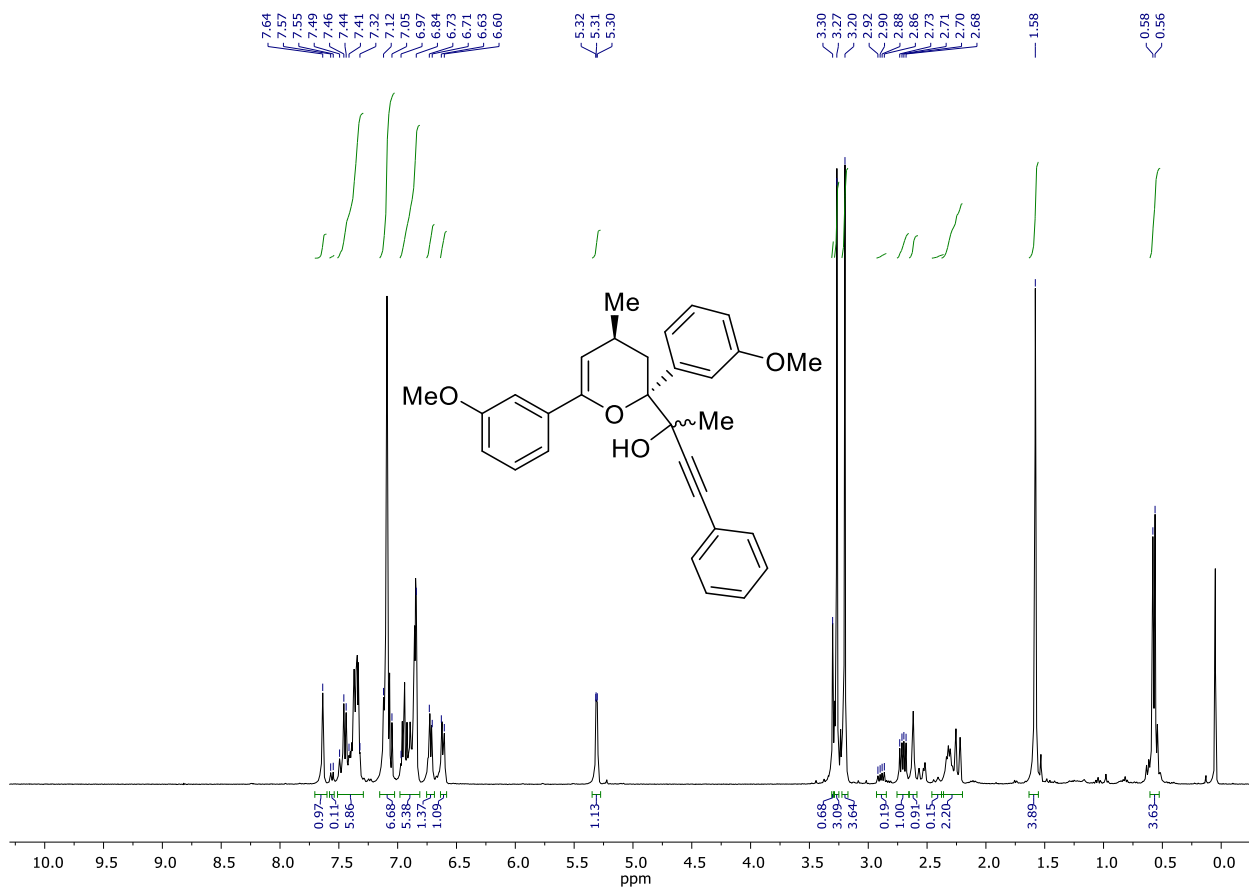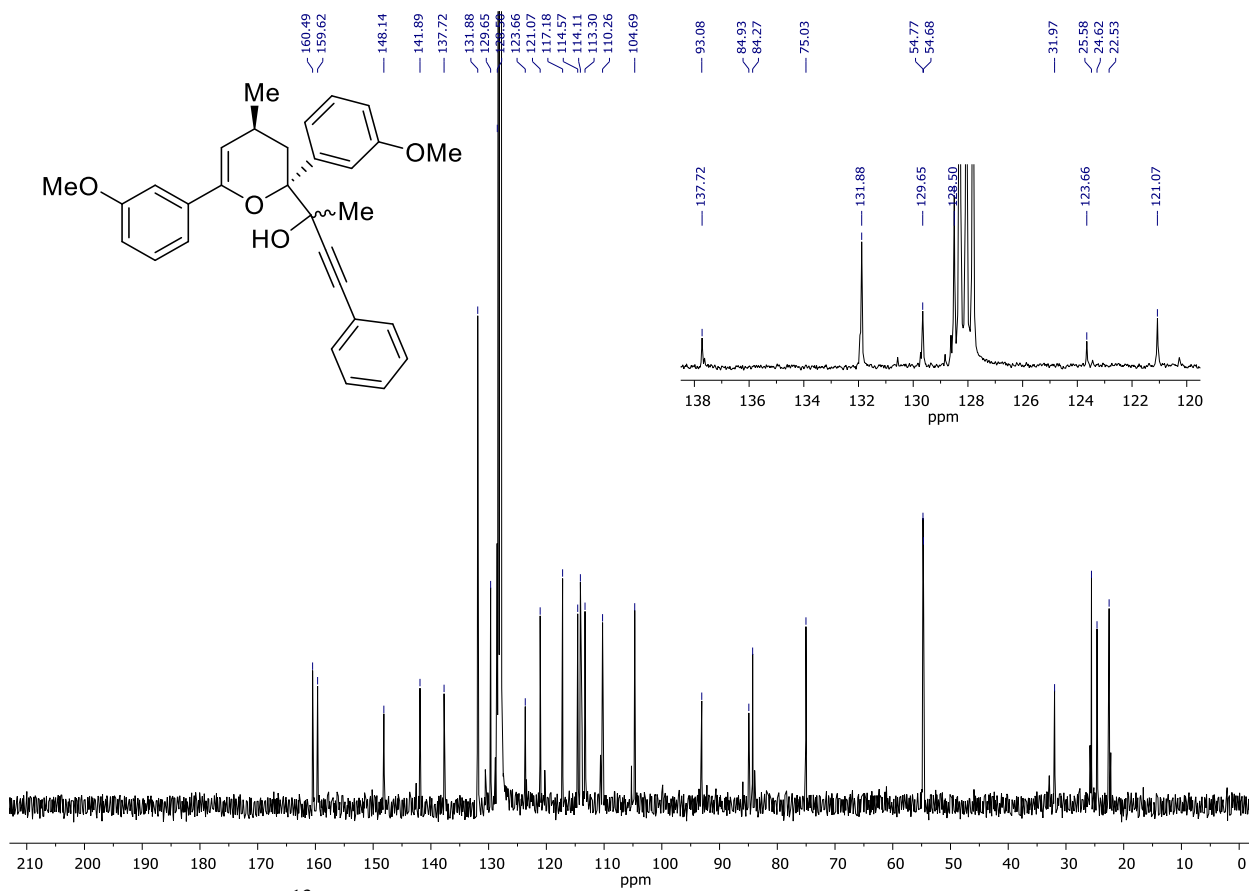

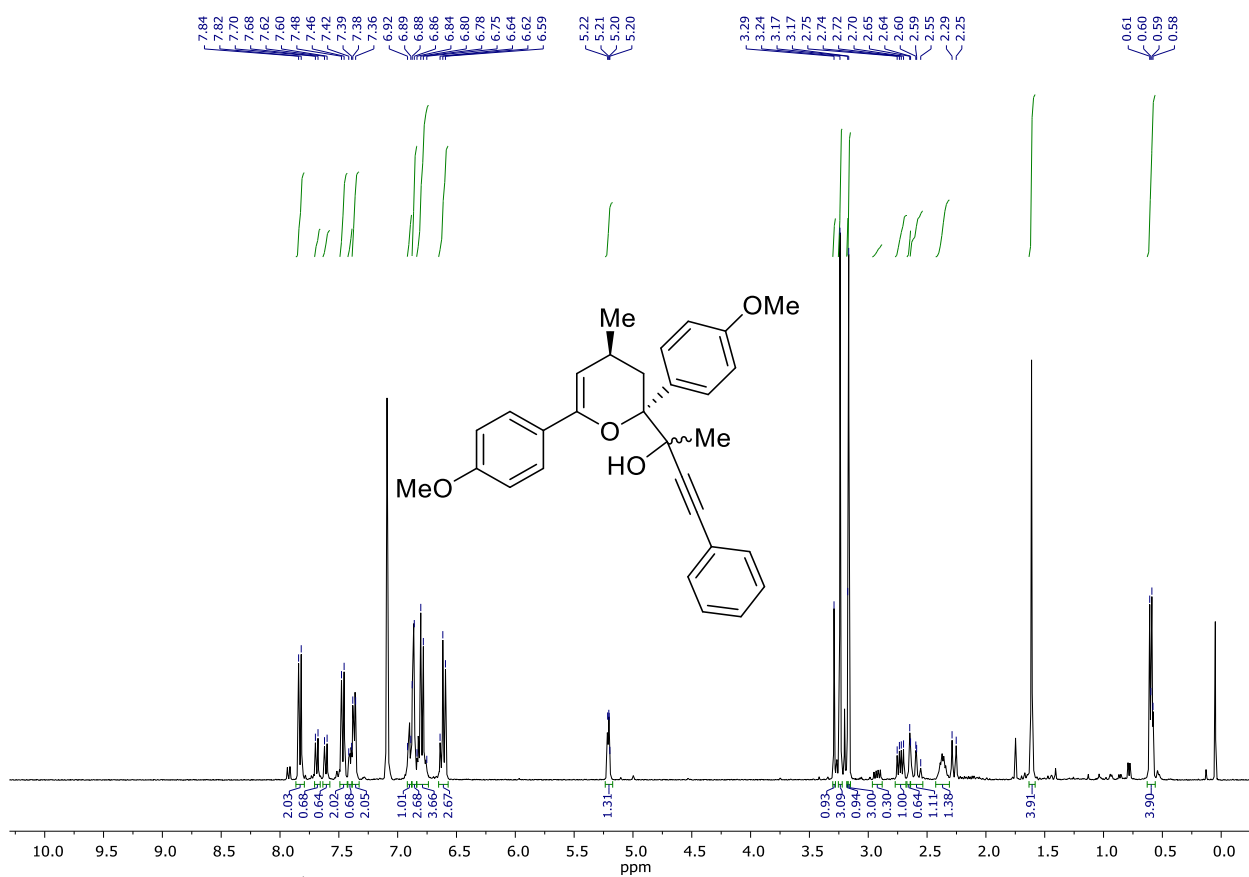

**<sup>1</sup>H NMR Spectrum of 4fb (400.1 MHz, benzene-d<sub>6</sub>)**

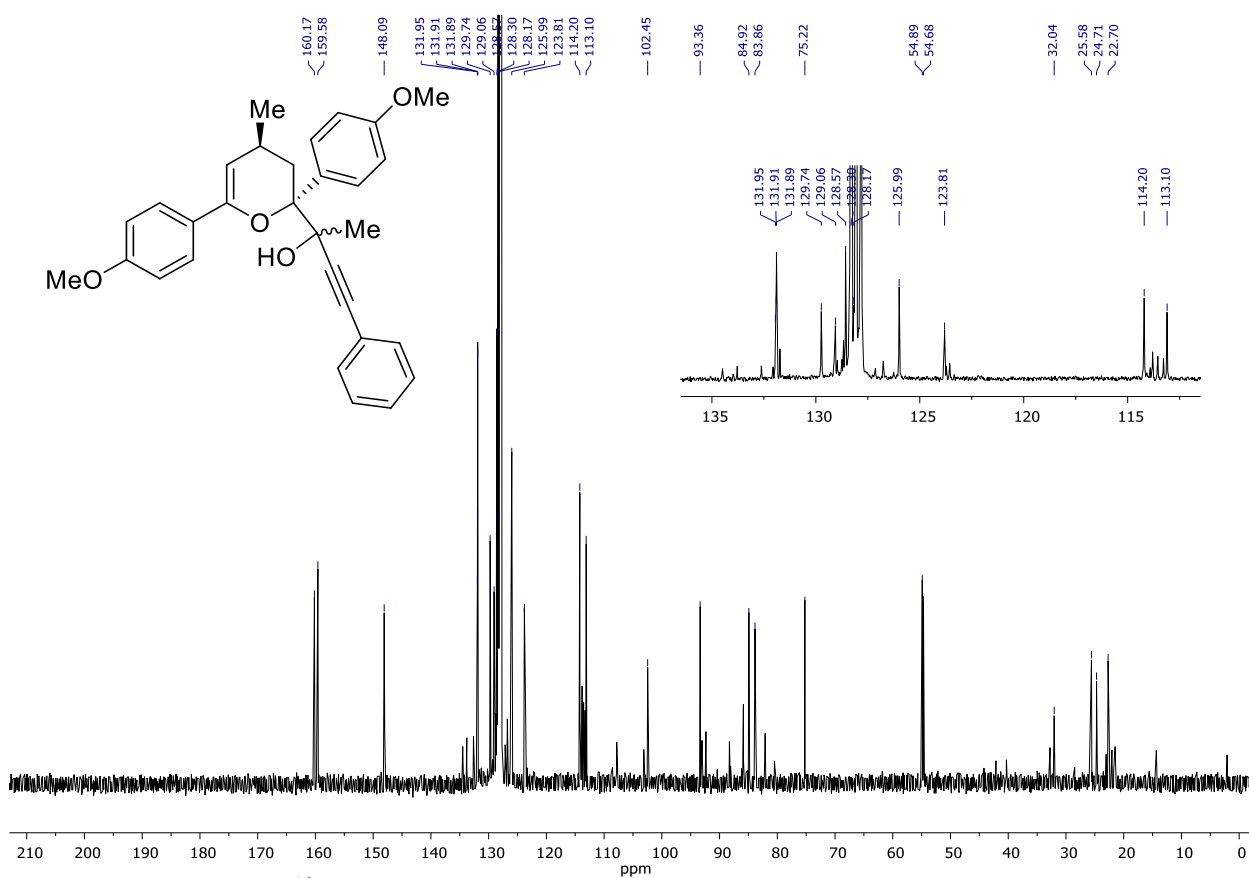

**<sup>13</sup>C NMR Spectrum of 4fb (100.6 MHz, benzene-d<sub>6</sub>)**

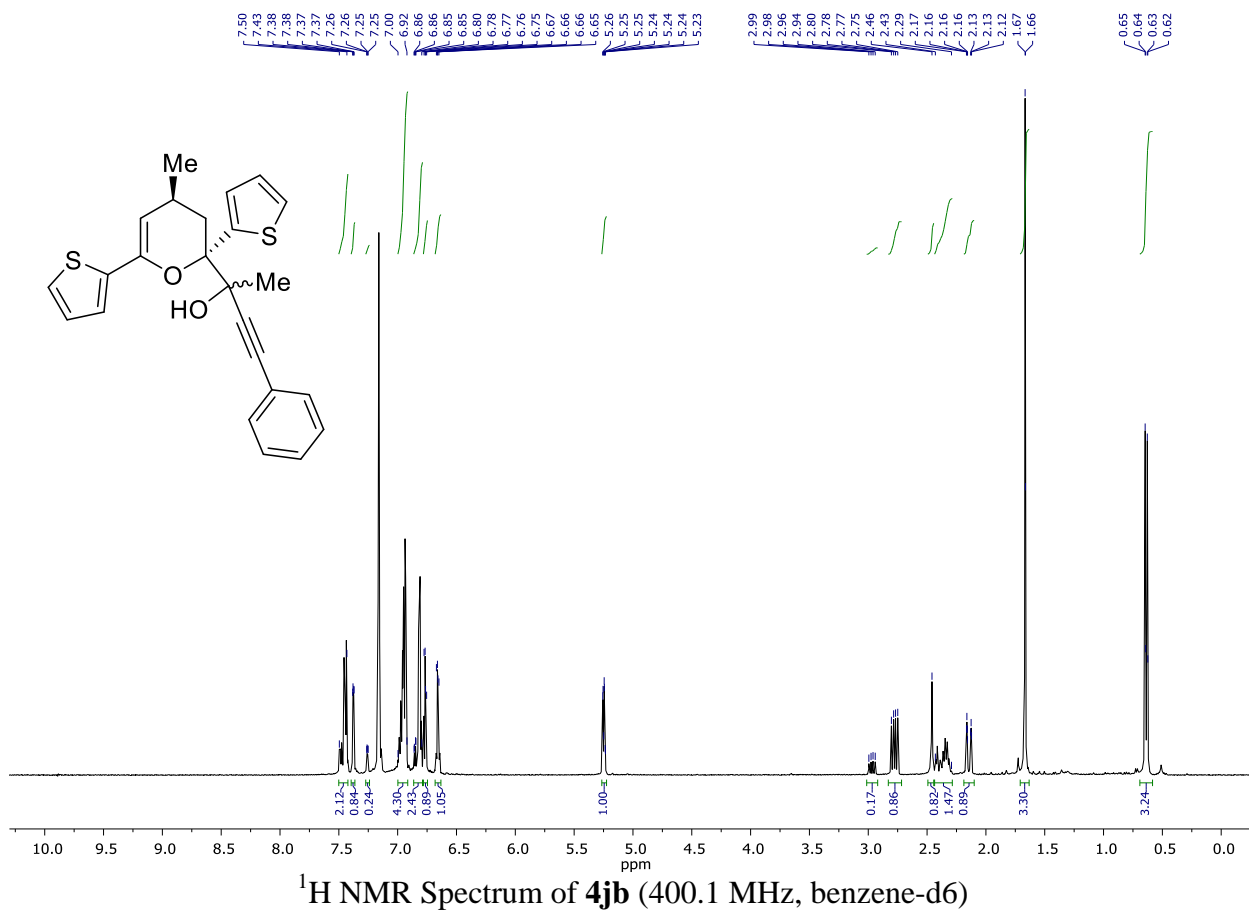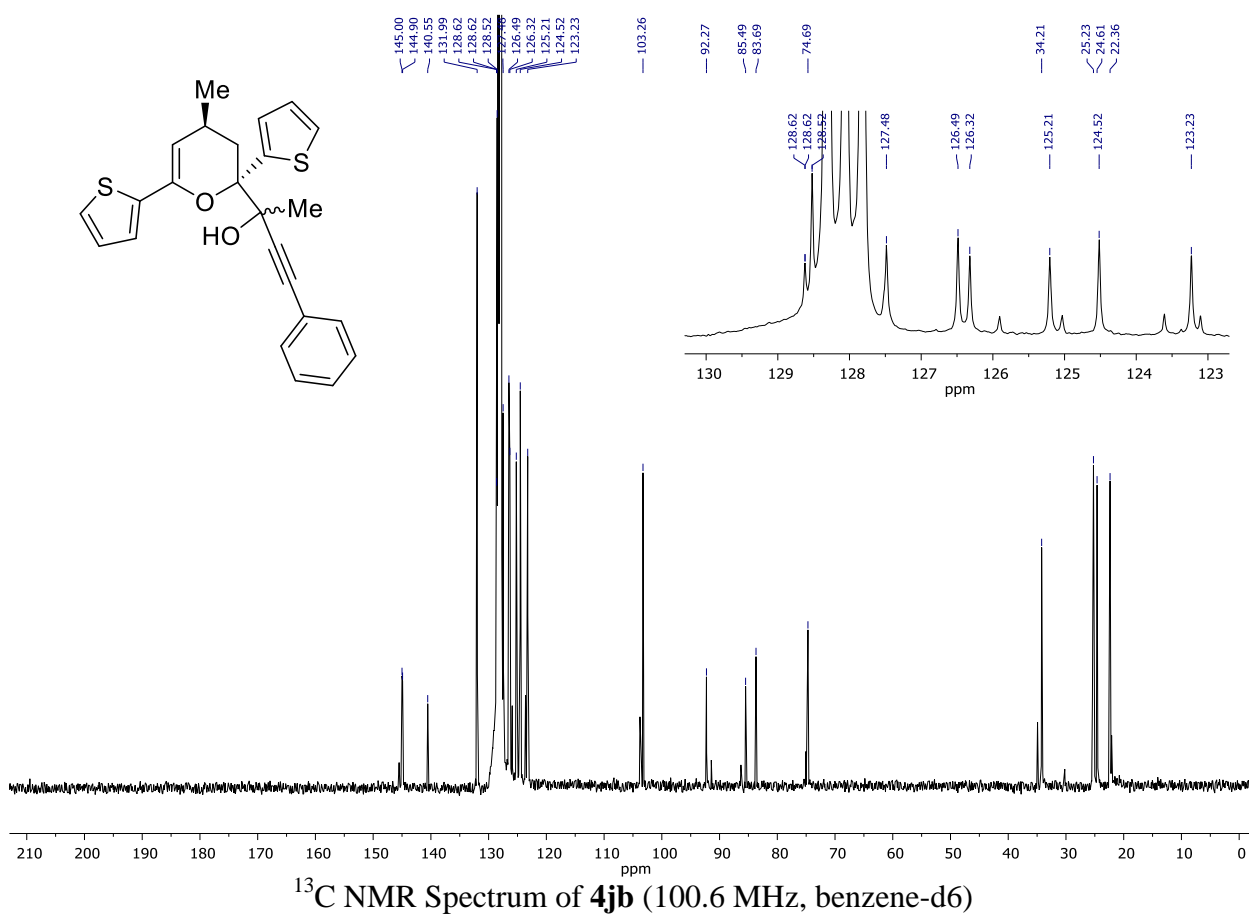



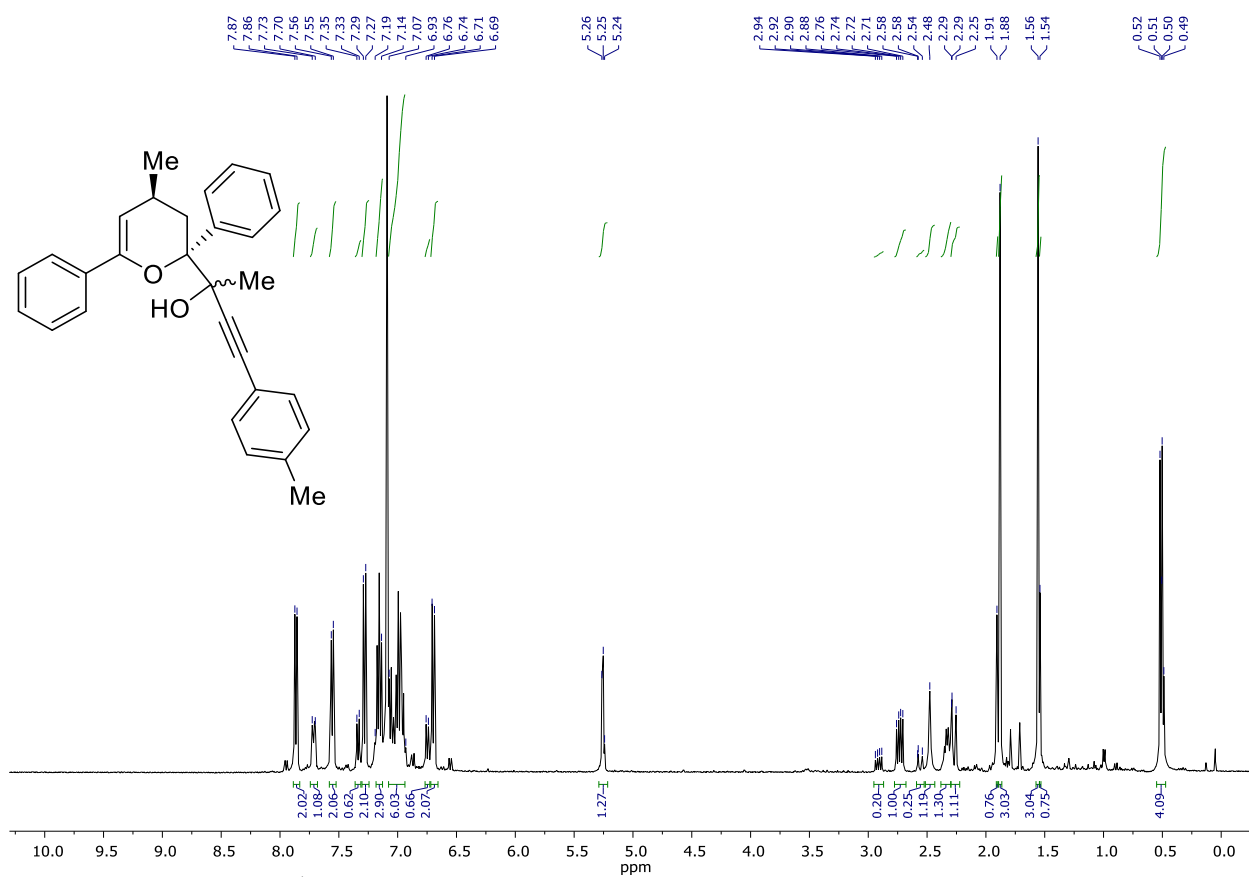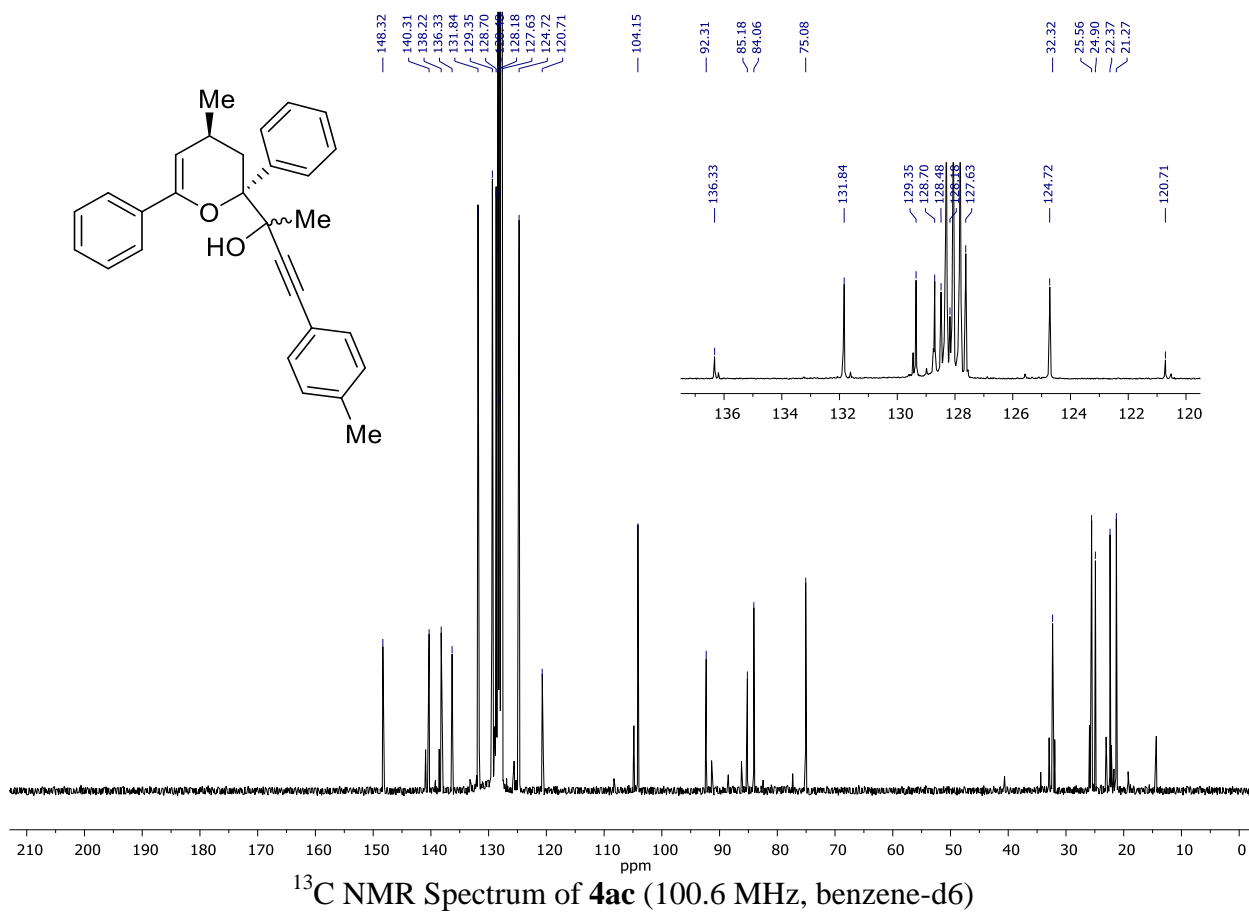

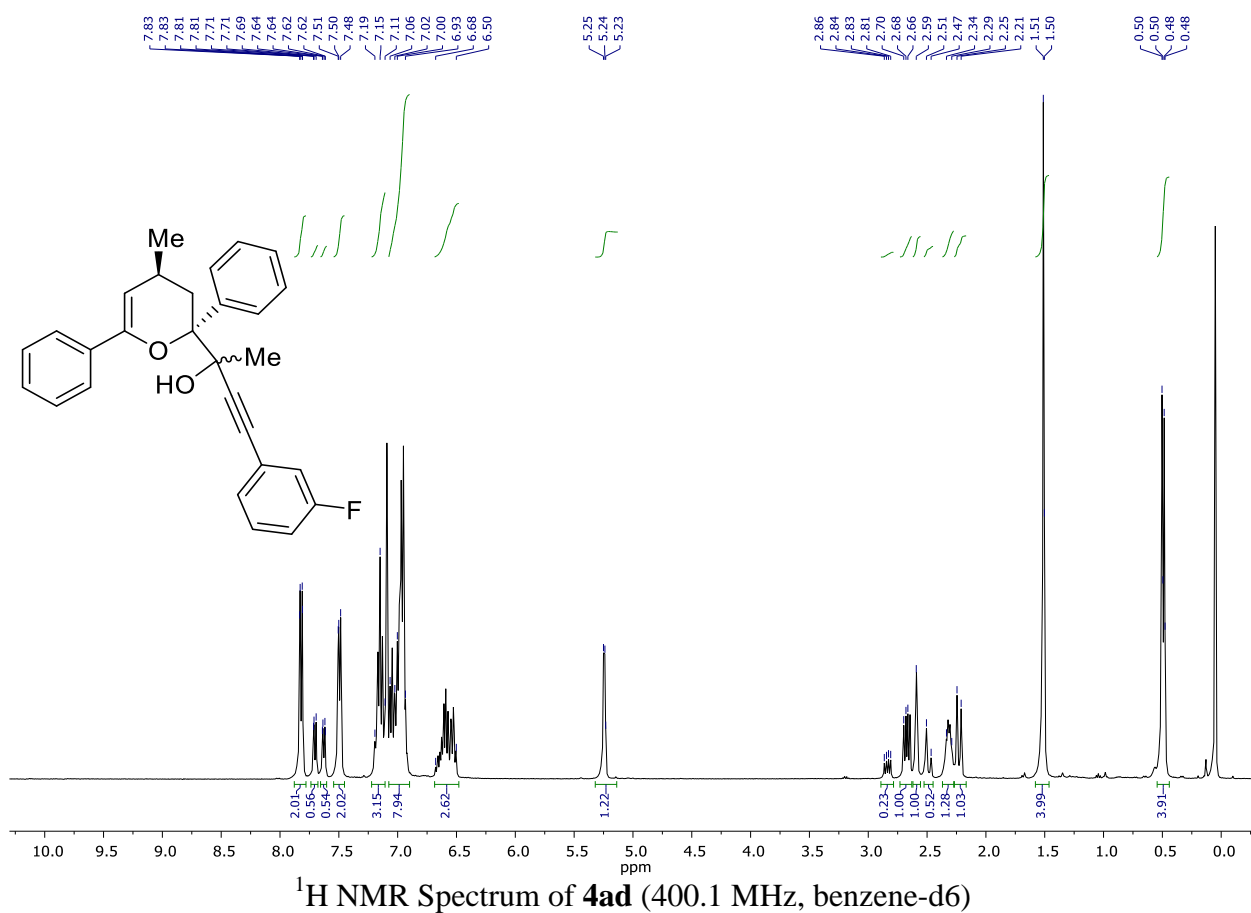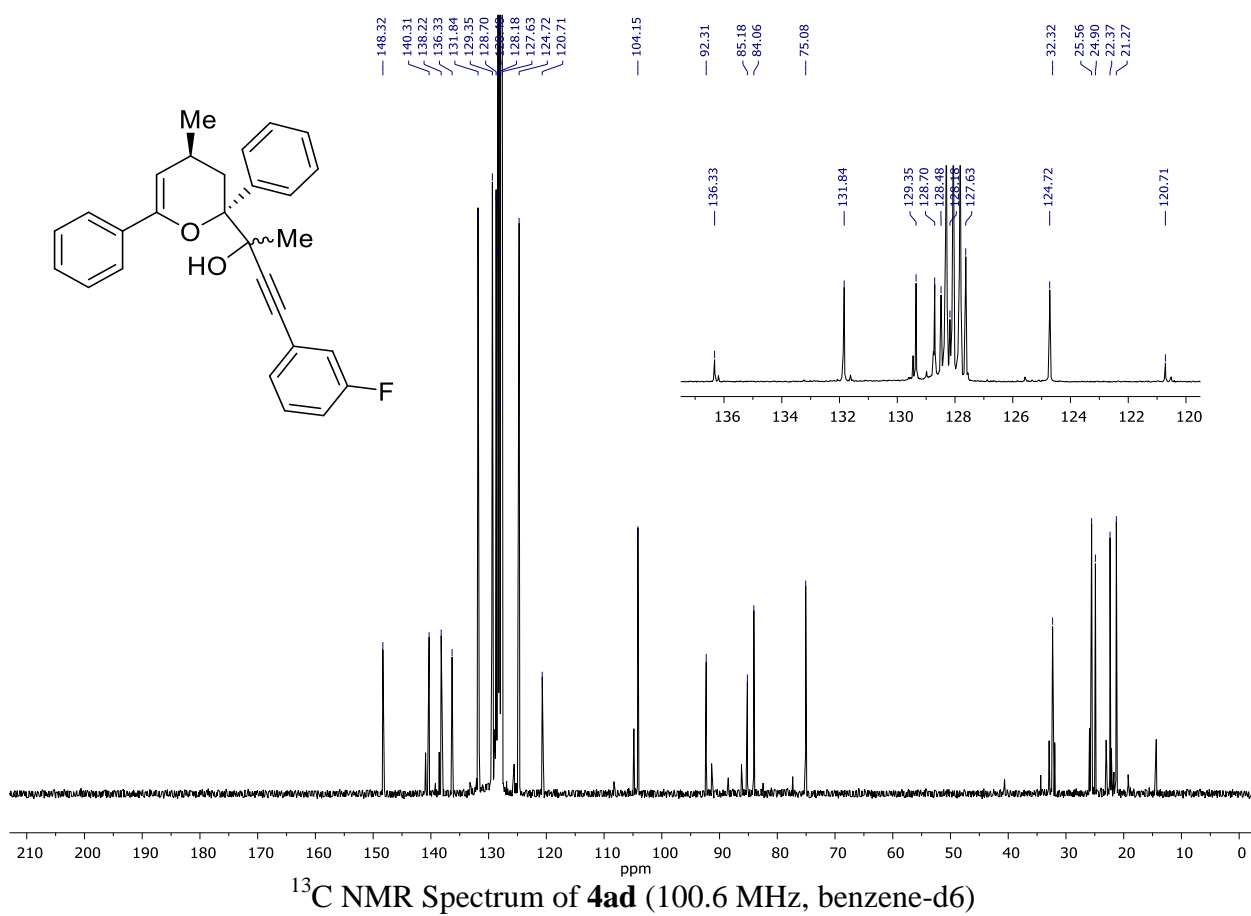

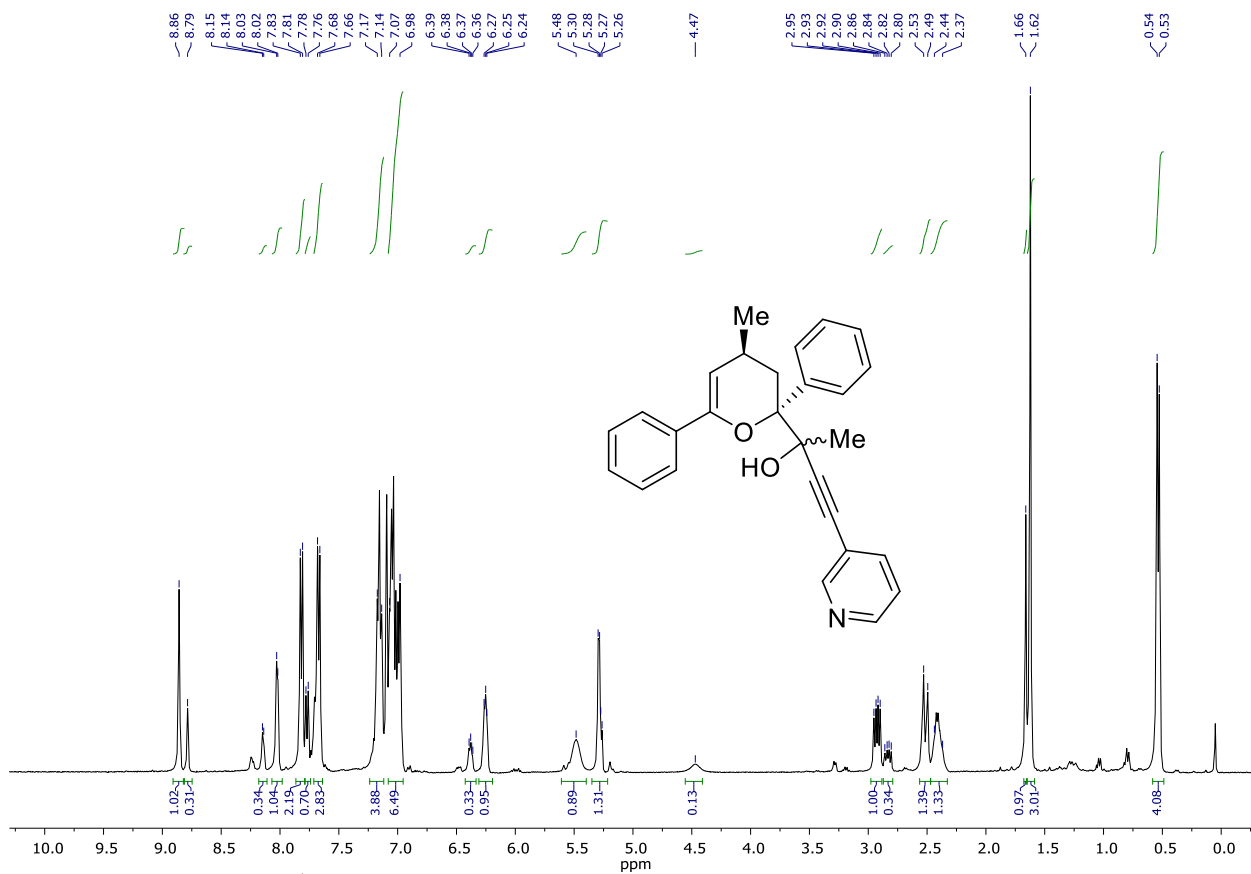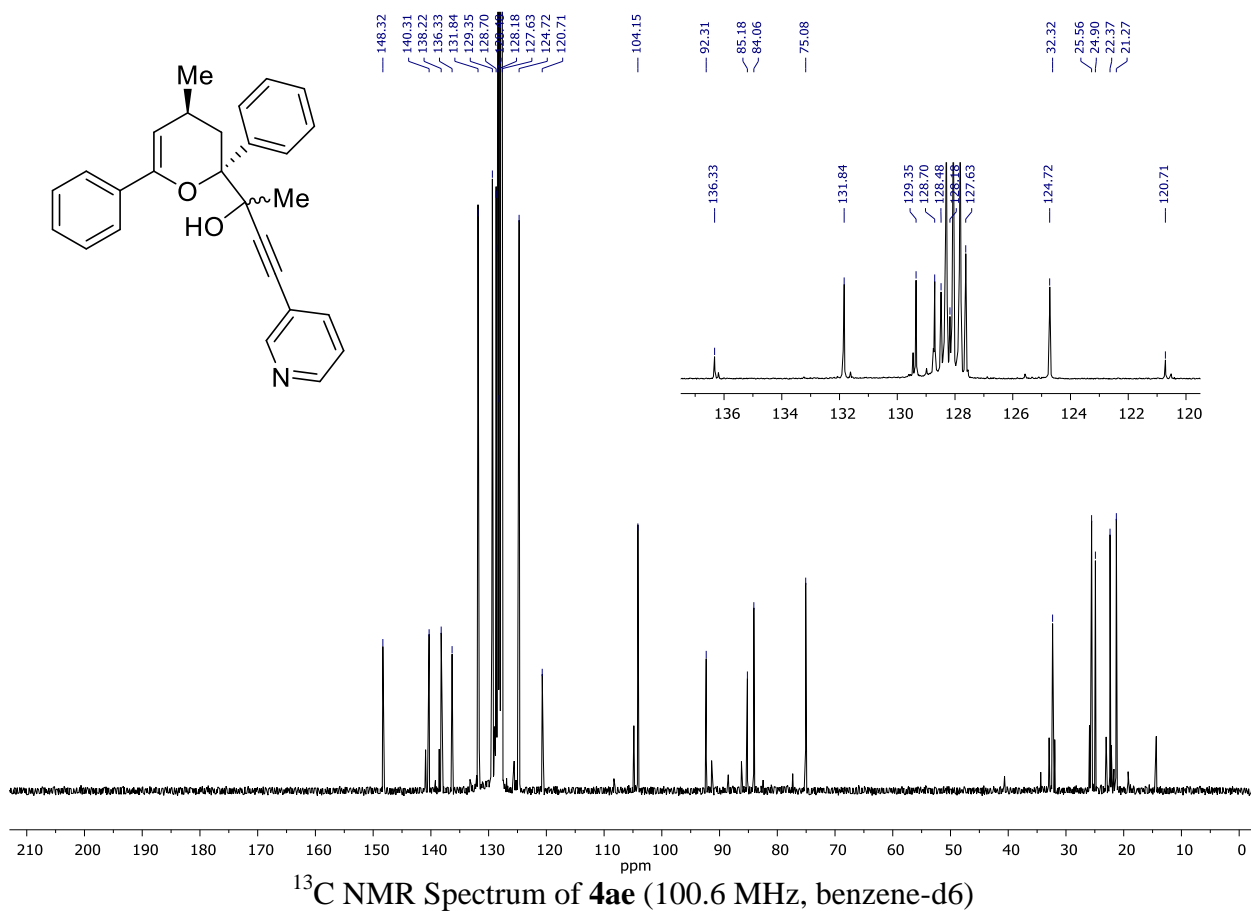

# $^1\text{H}$ and $^{13}\text{C}$ Spectra of 7-ethynyl-6,8-dioxabicyclo[3.2.1]octanes **5**

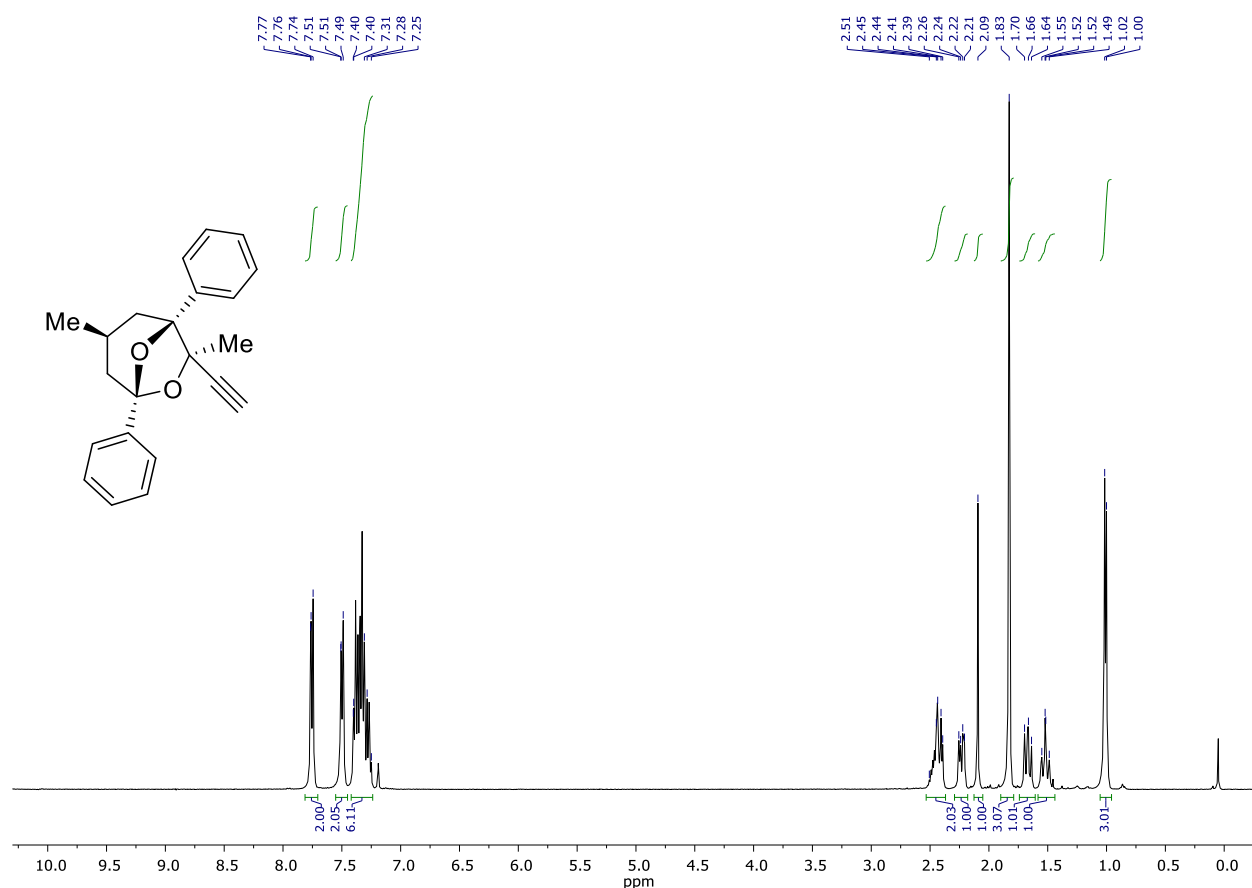

$^1\text{H}$  NMR Spectrum of  $(1S^*,3S^*,5R^*,7R^*)$ -**5aa** (400.1 MHz, CDCl<sub>3</sub>)

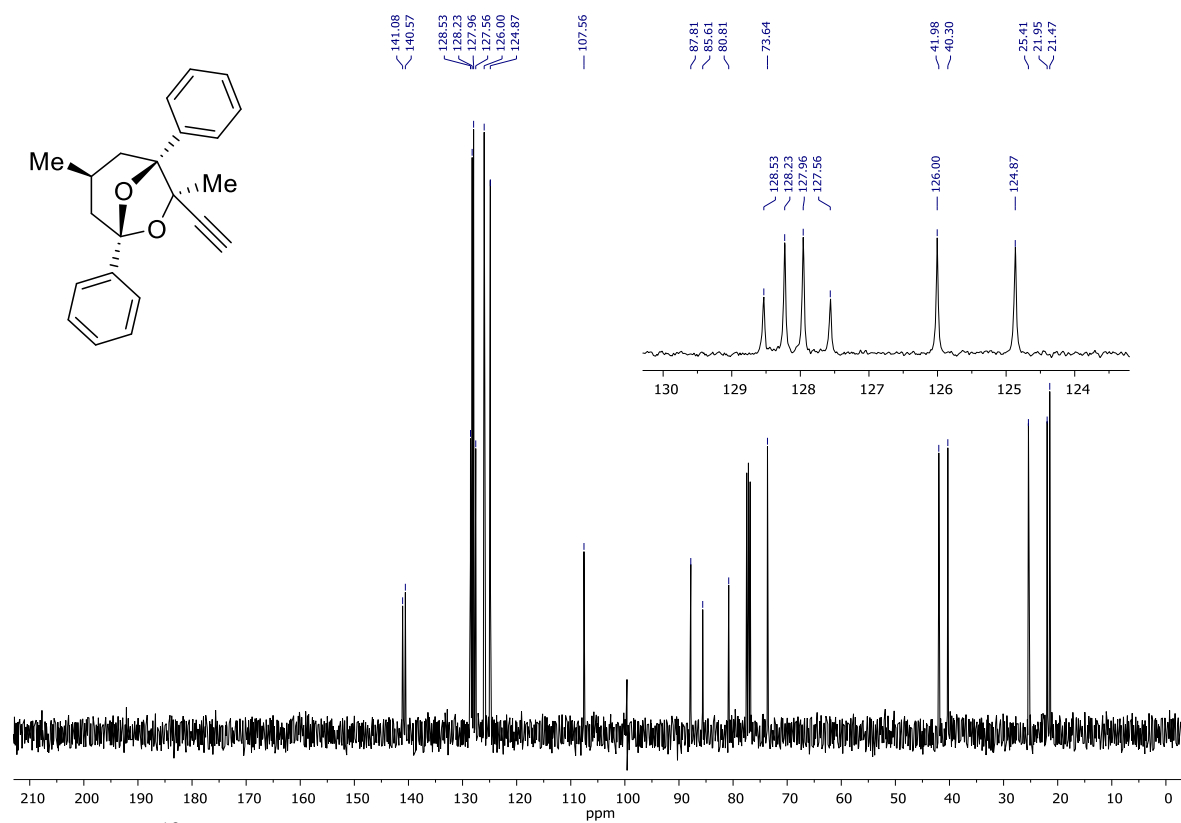

$^{13}\text{C}$  NMR Spectrum of  $(1S^*,3S^*,5R^*,7R^*)$ -**5aa** (100.6 MHz, CDCl<sub>3</sub>)

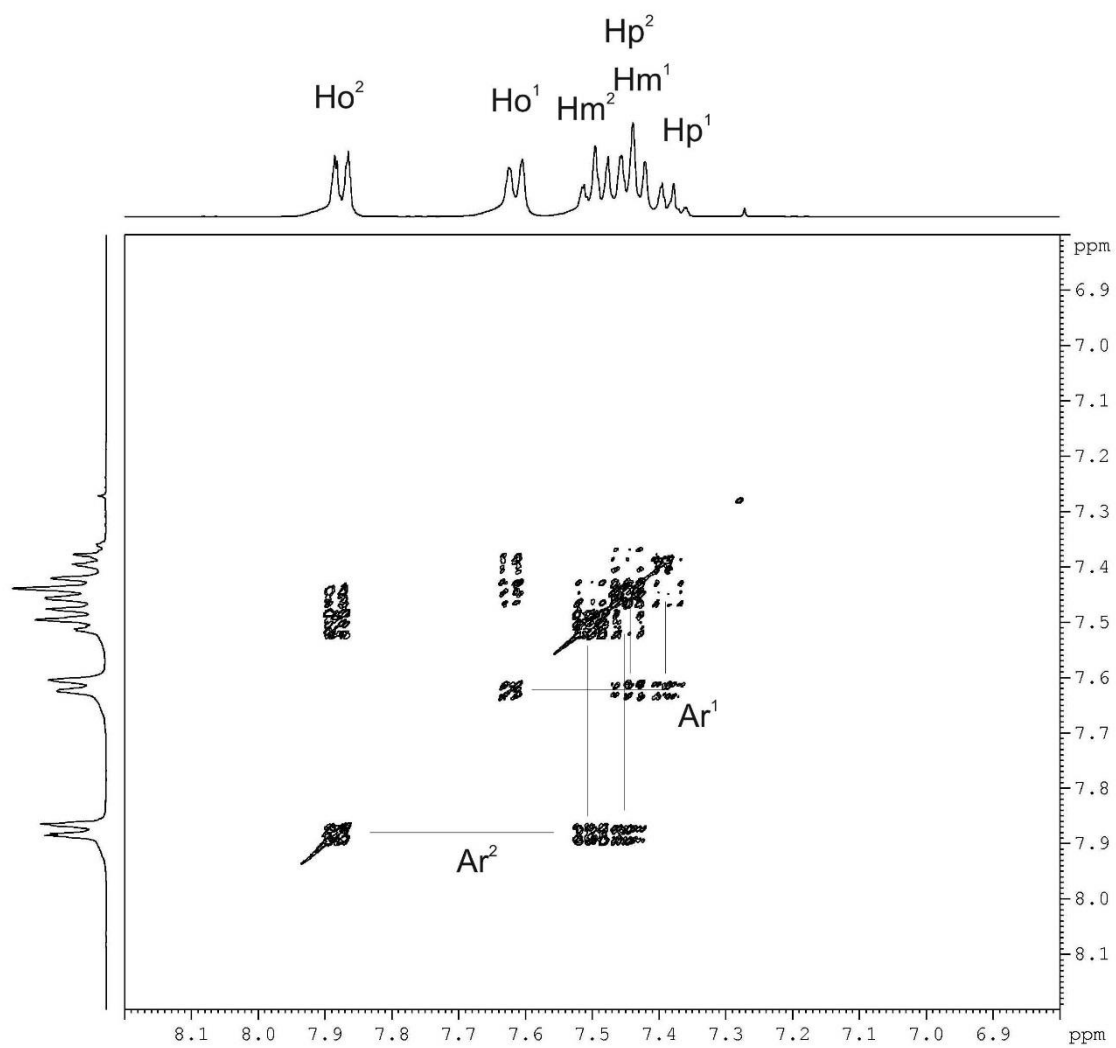

2D COSY Spectrum of (1*S*\*,3*S*\*,5*R*\*,7*R*\*)-5aa (aromatic region) (400.1 MHz, CDCl<sub>3</sub>)

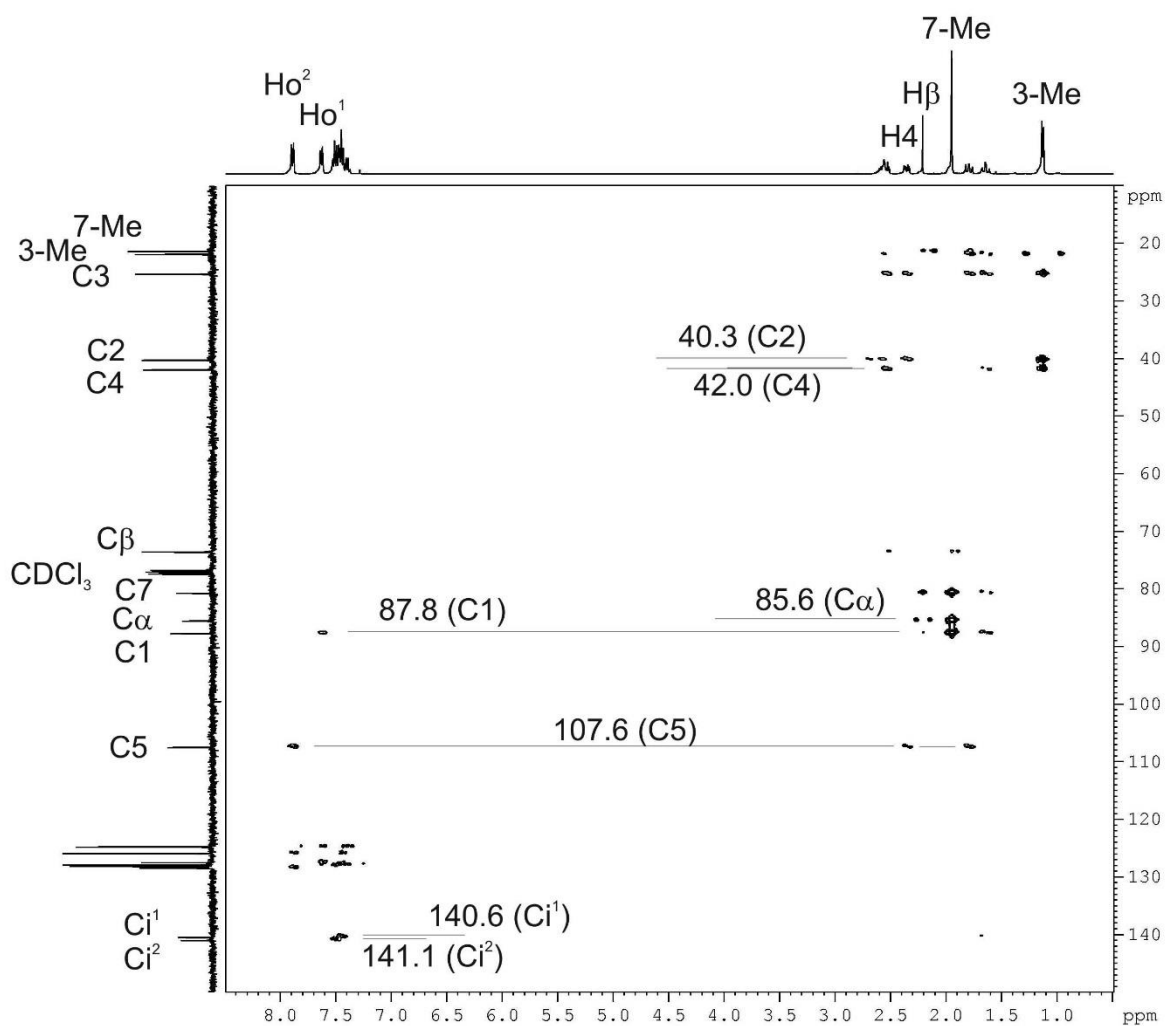

2D  $^1\text{H}$ - $^{13}\text{C}$  HMBC Spectrum of (1*S*\*,3*S*\*,5*R*\*,7*R*\*)-5aa.

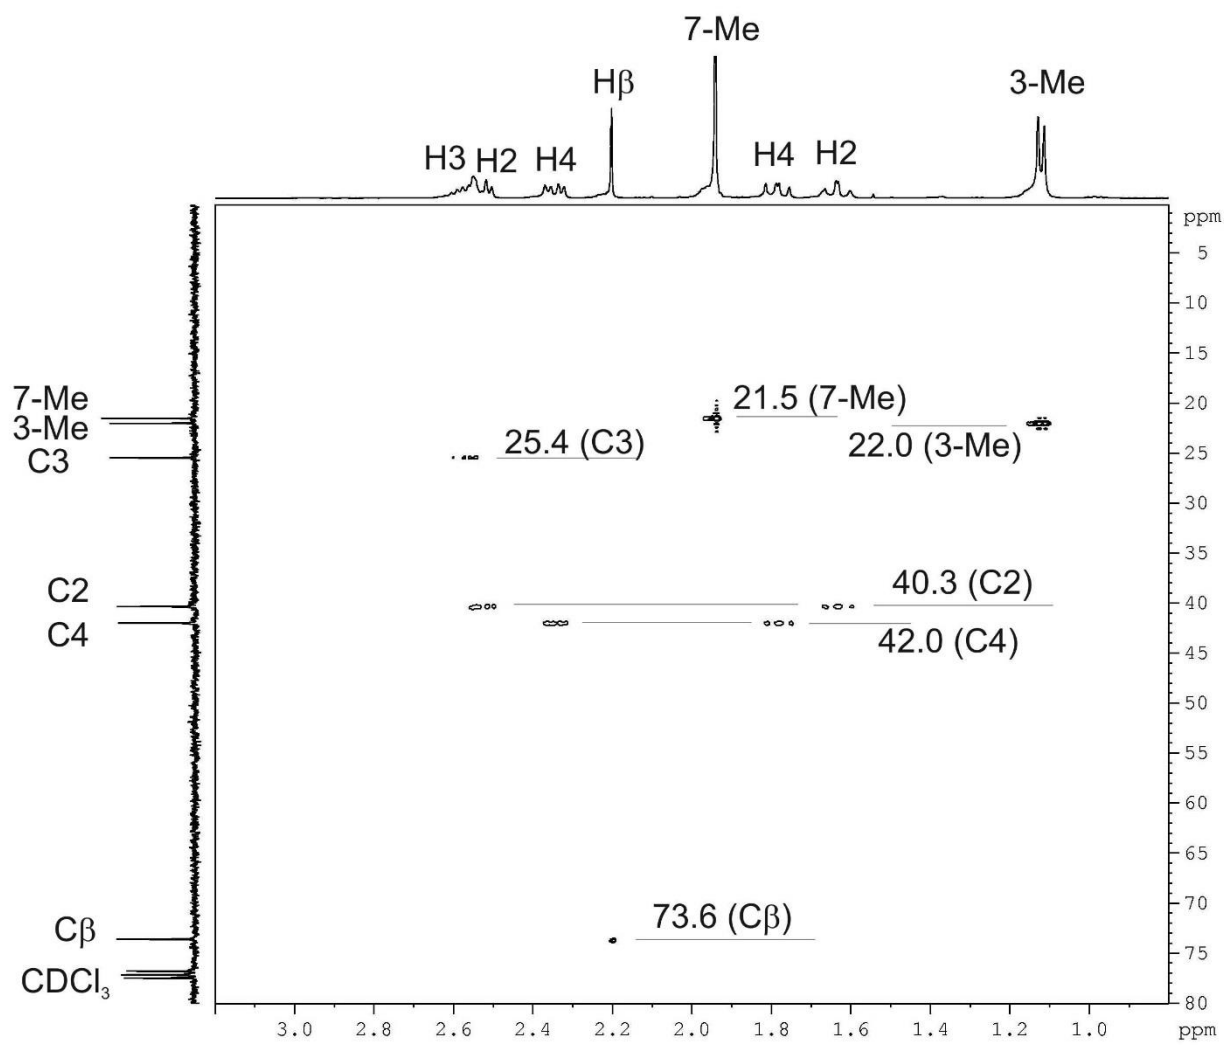

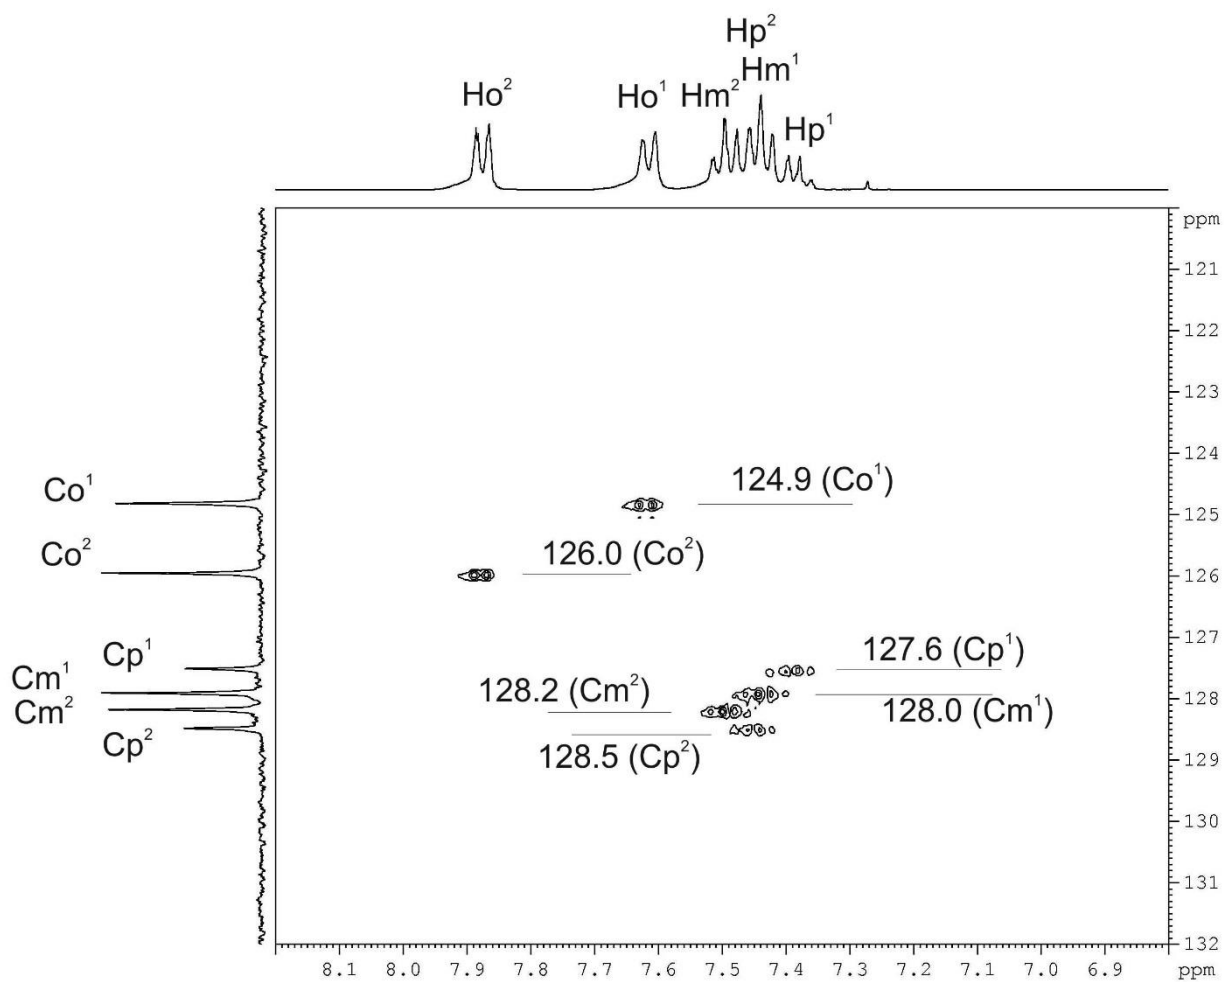

2D  $^1\text{H}$ - $^{13}\text{C}$  HSQC Spectrum of (1*S*\*,3*S*\*,5*R*\*,7*R*\*)-5aa (aromatic region)



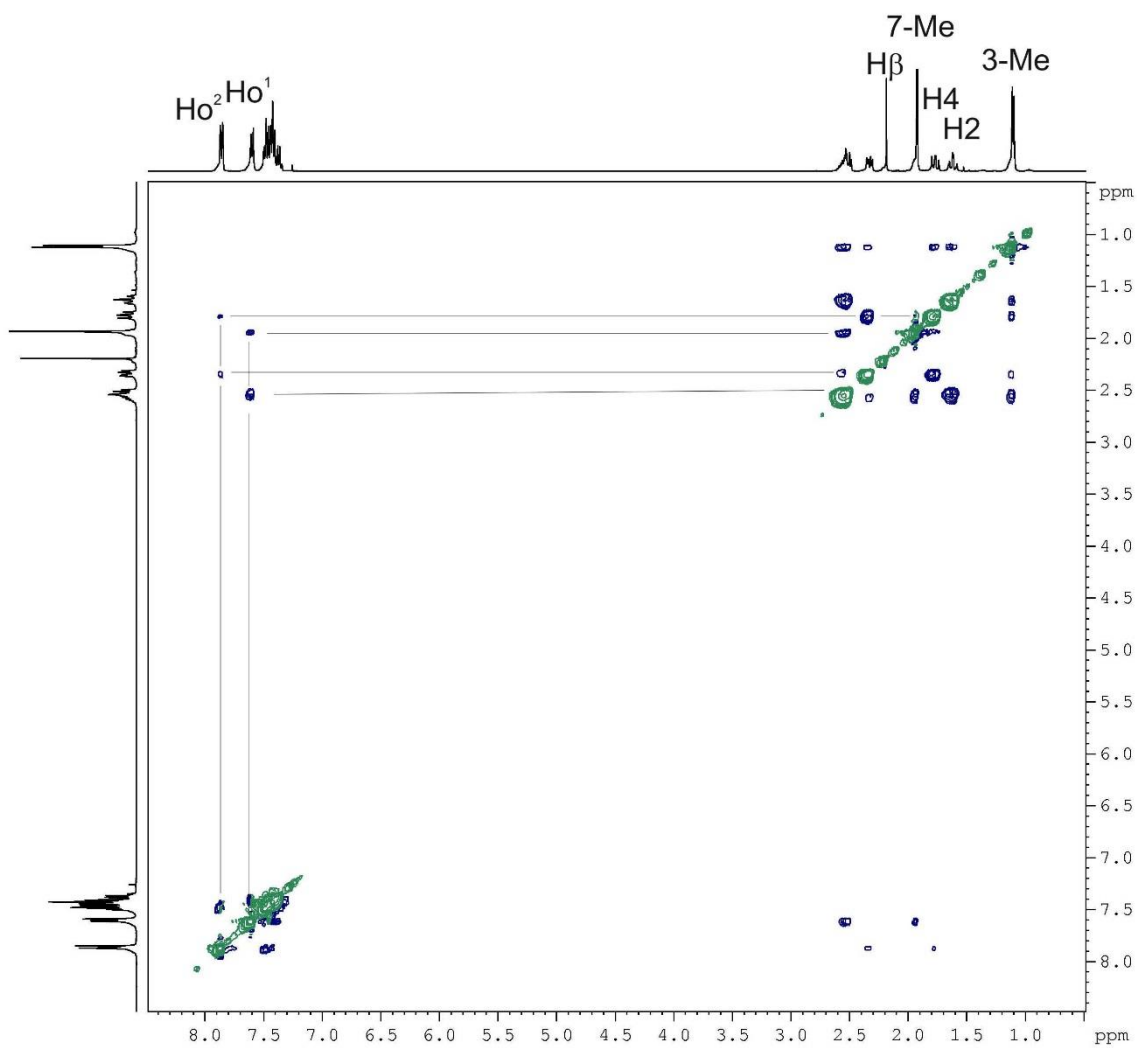

2D NOESY Spectrum of (1*S*\*,3*S*\*,5*R*\*,7*R*\*)-5aa (400.1 MHz, CDCl<sub>3</sub>)

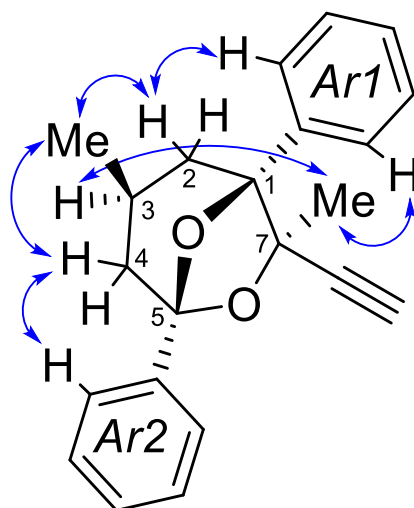

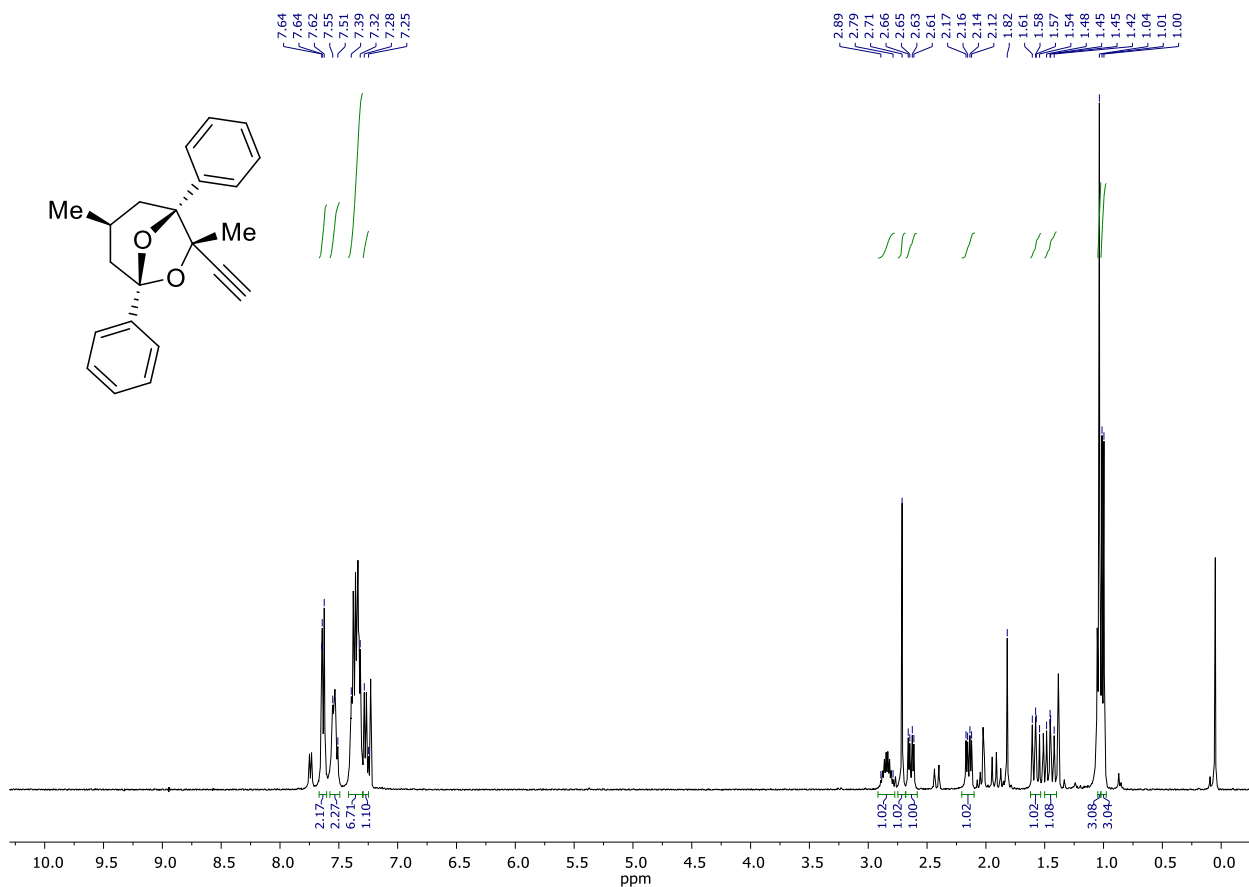

**<sup>1</sup>H NMR Spectrum of (1*S*\*,3*S*\*,5*R*\*,7*S*\*)-5aa (400.1 MHz, CDCl<sub>3</sub>)**

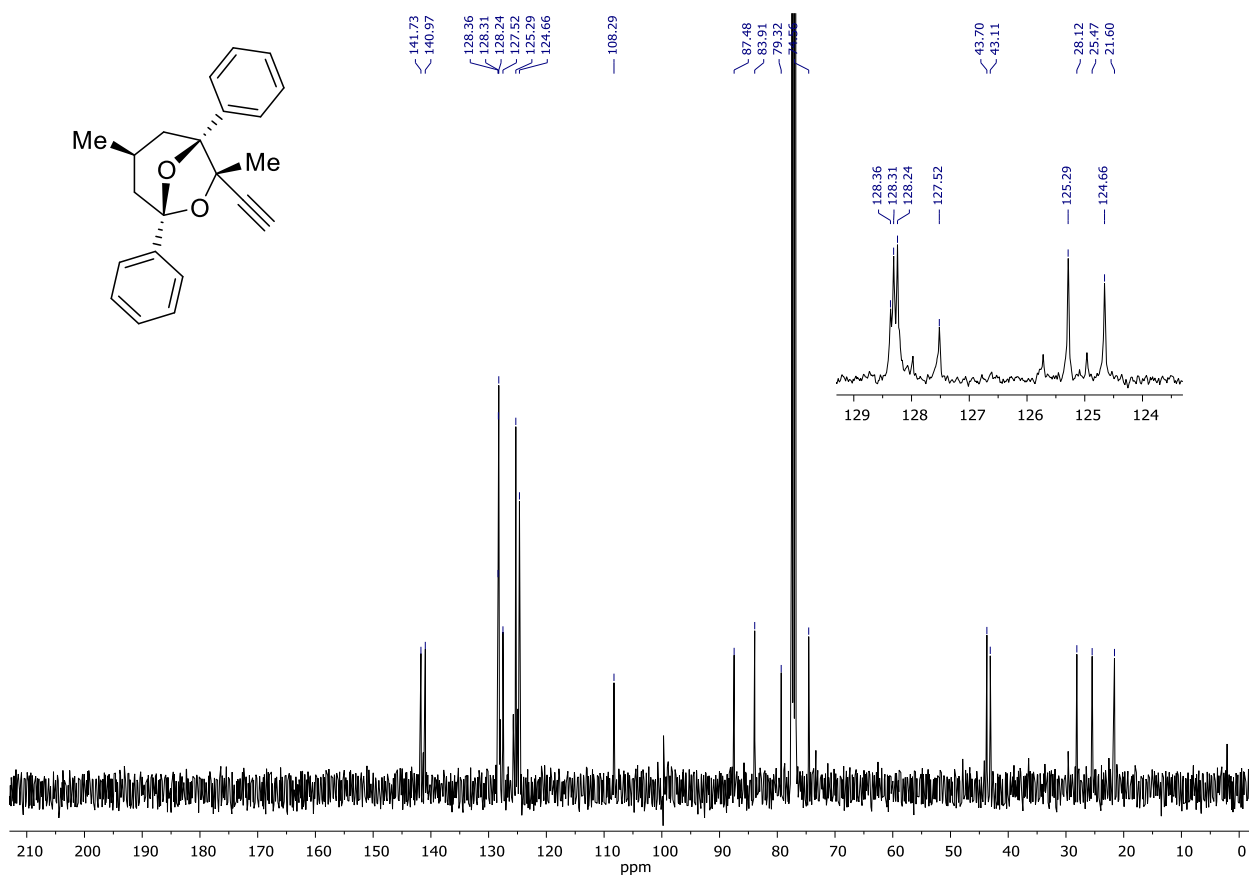

**<sup>13</sup>C NMR Spectrum of (1*S*\*,3*S*\*,5*R*\*,7*S*\*)-5aa (100.6 MHz, CDCl<sub>3</sub>)**

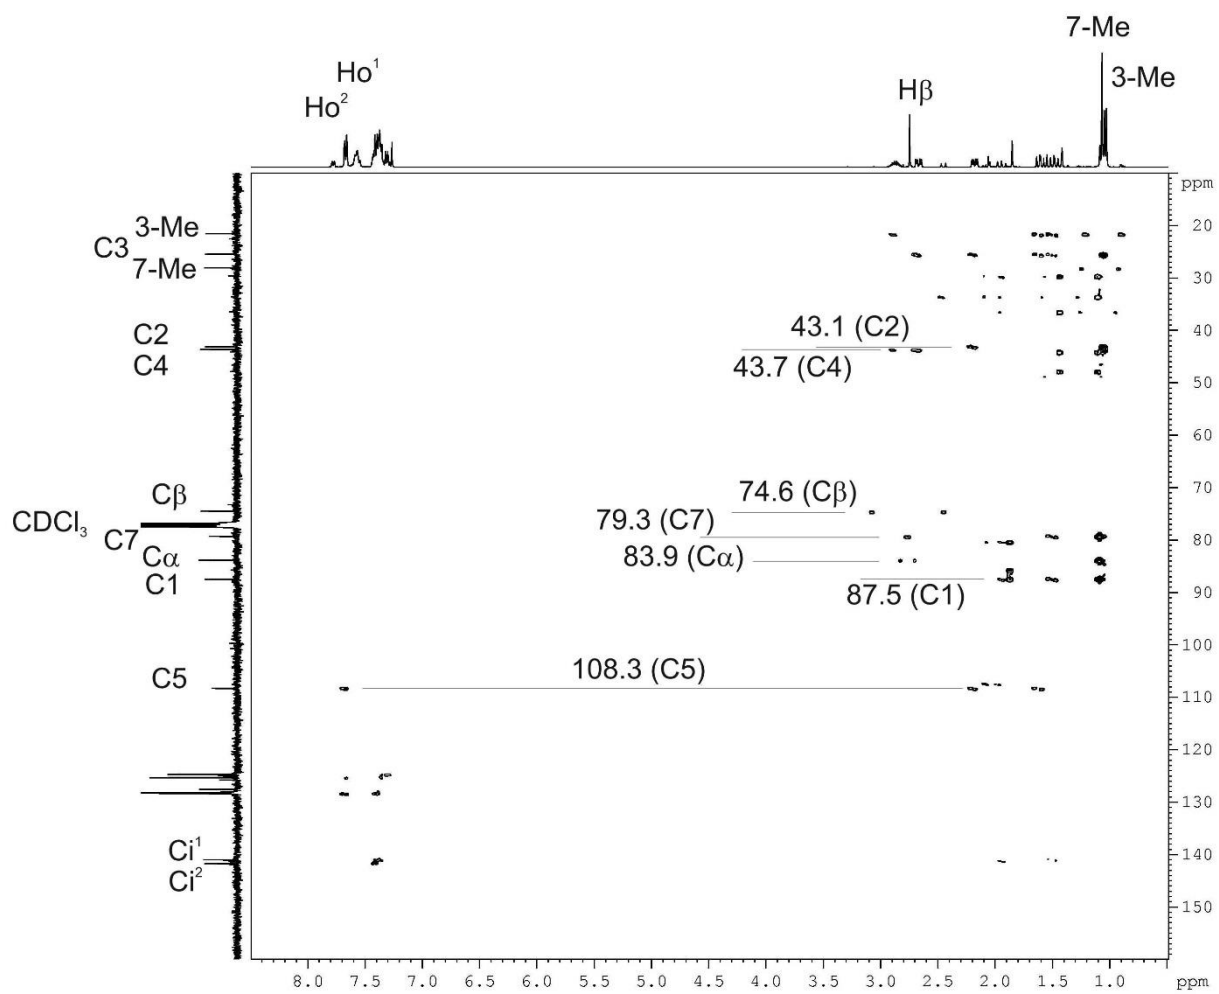

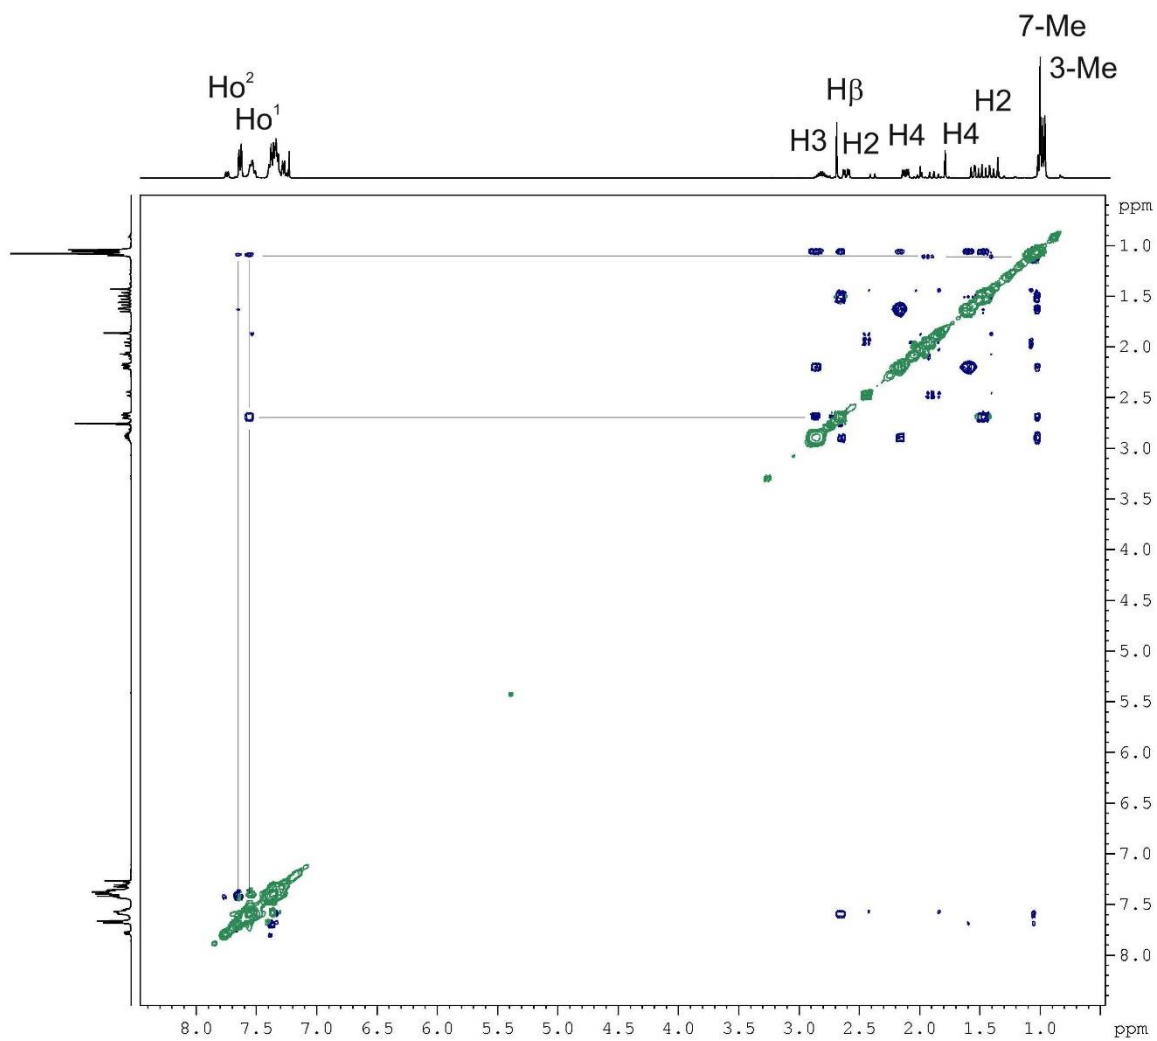

2D NOESY Spectrum of (1*S*\*,3*S*\*,5*R*\*,7*S*\*)-**5aa** (400.1 MHz, CDCl<sub>3</sub>)

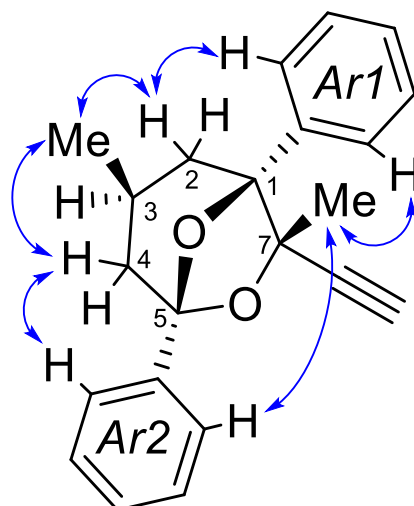

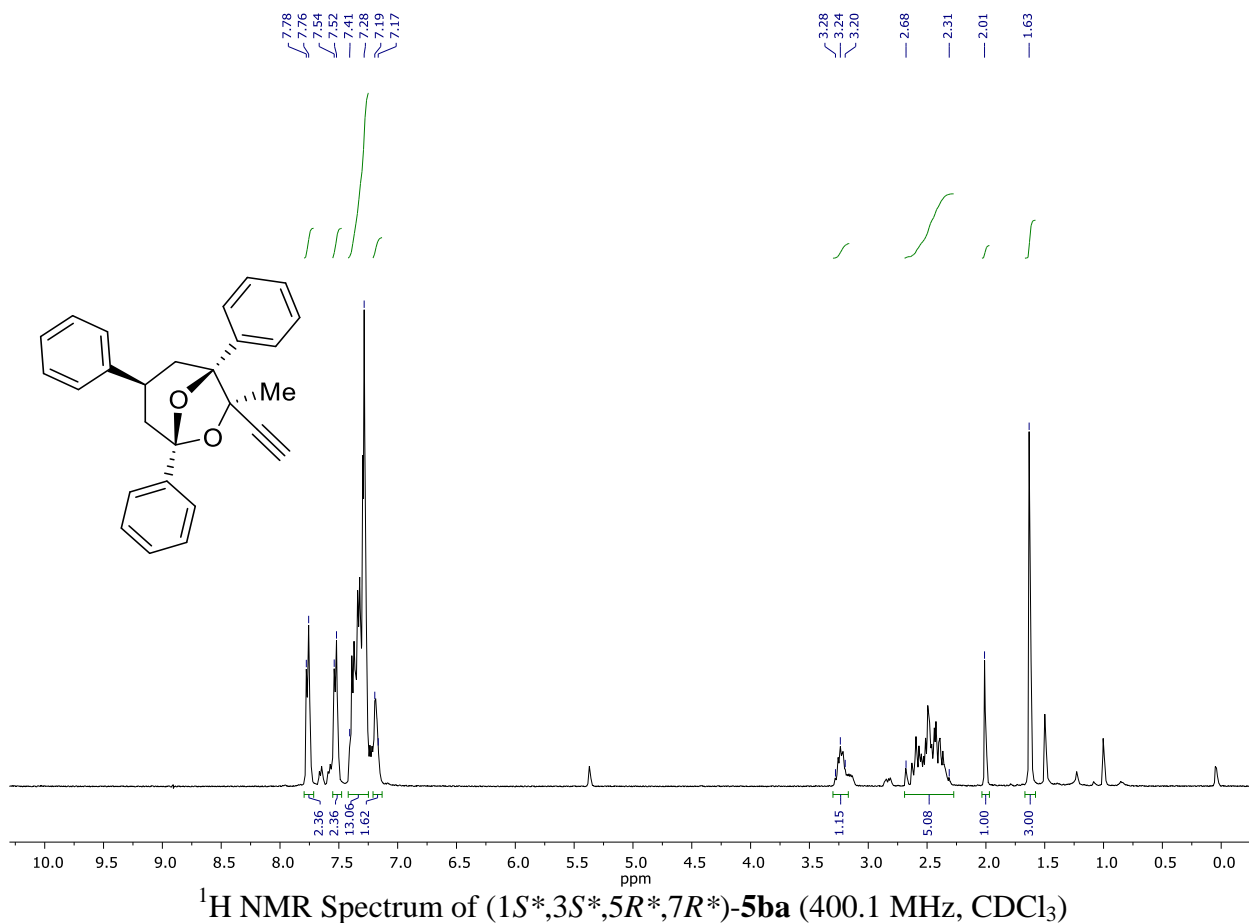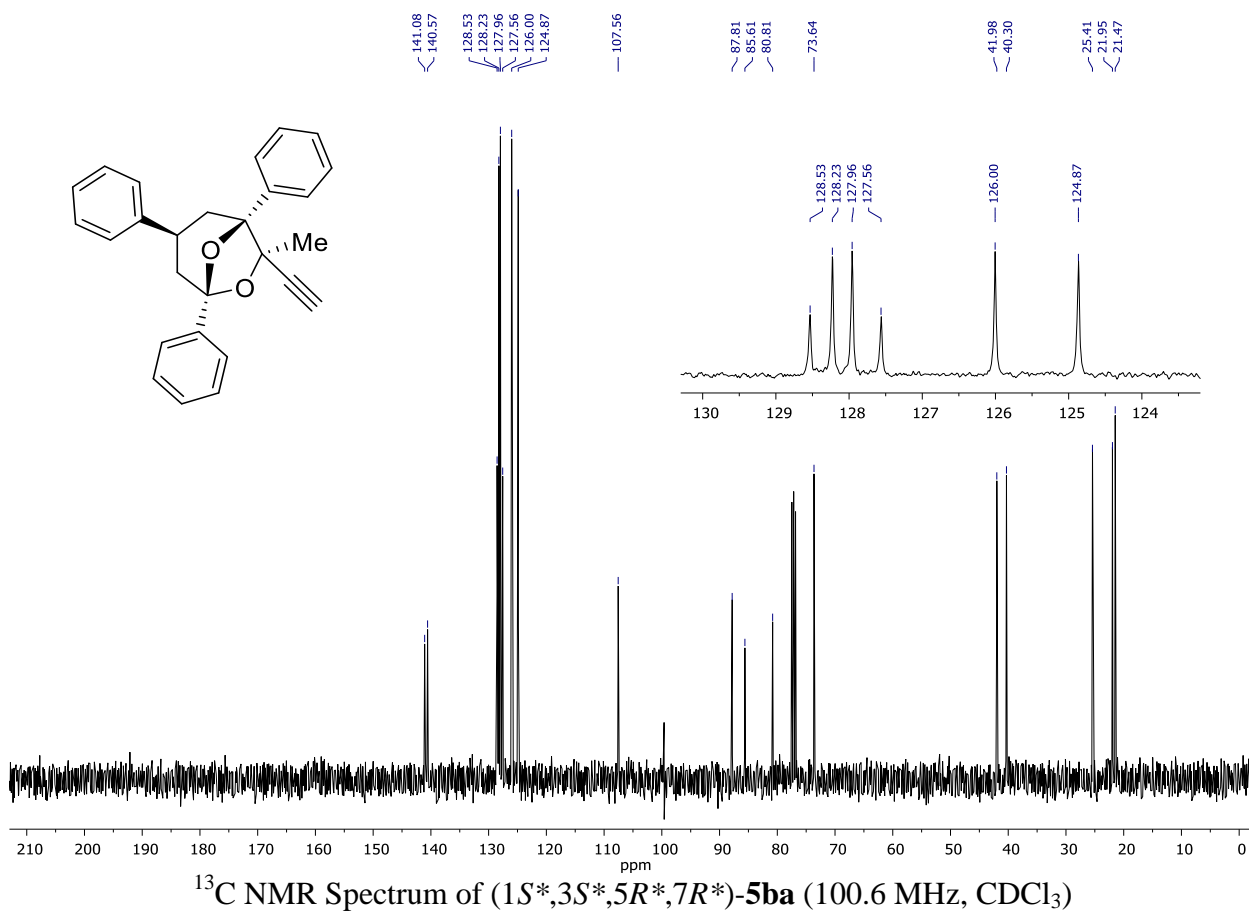

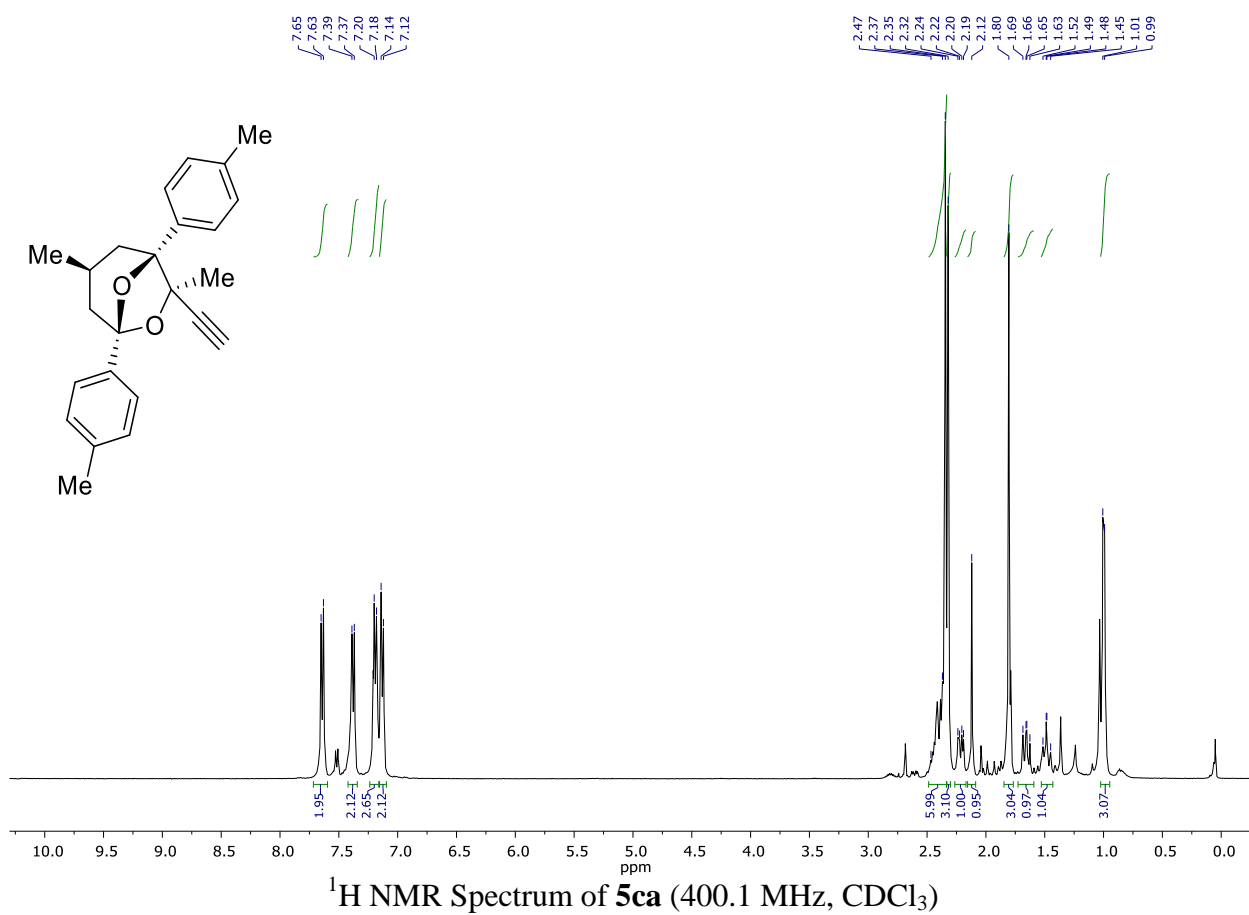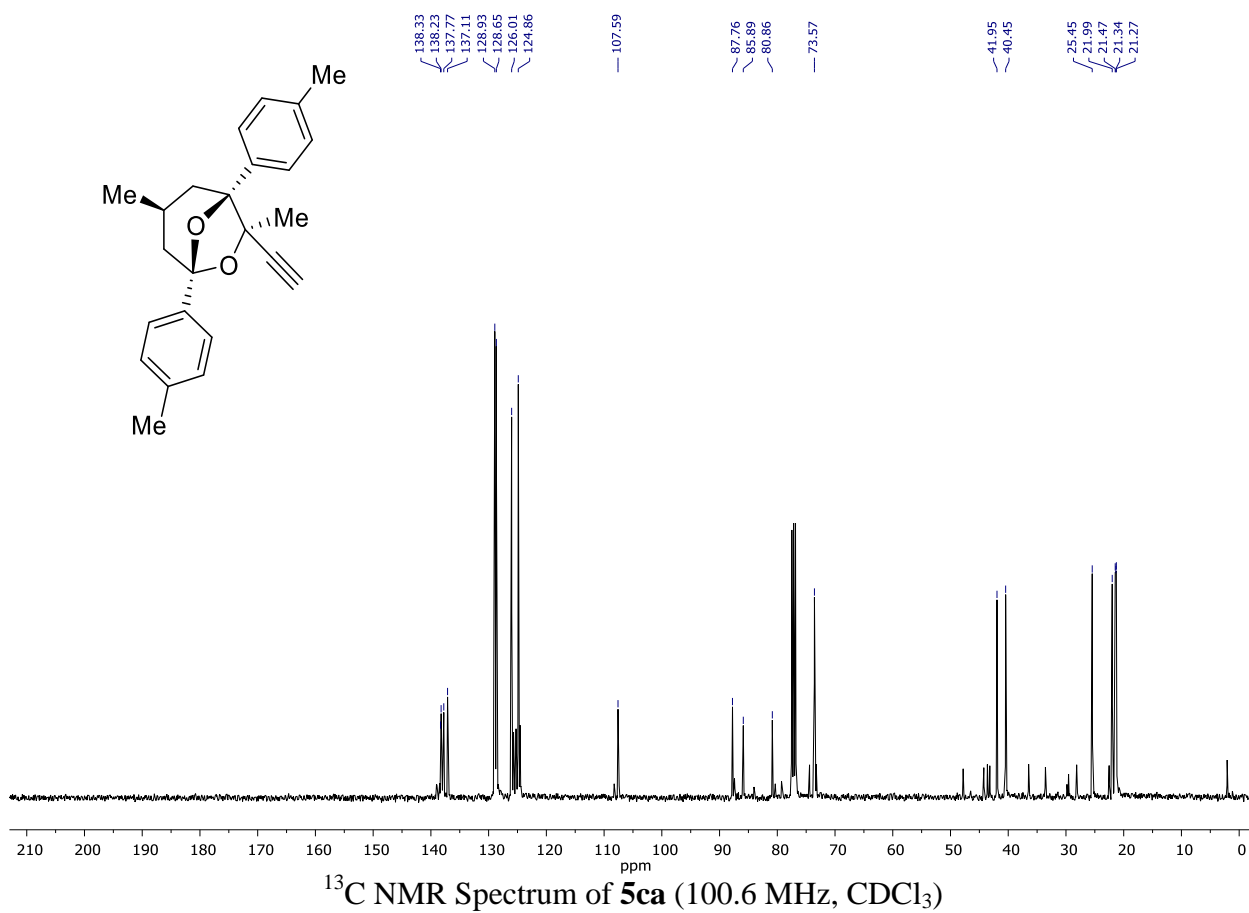

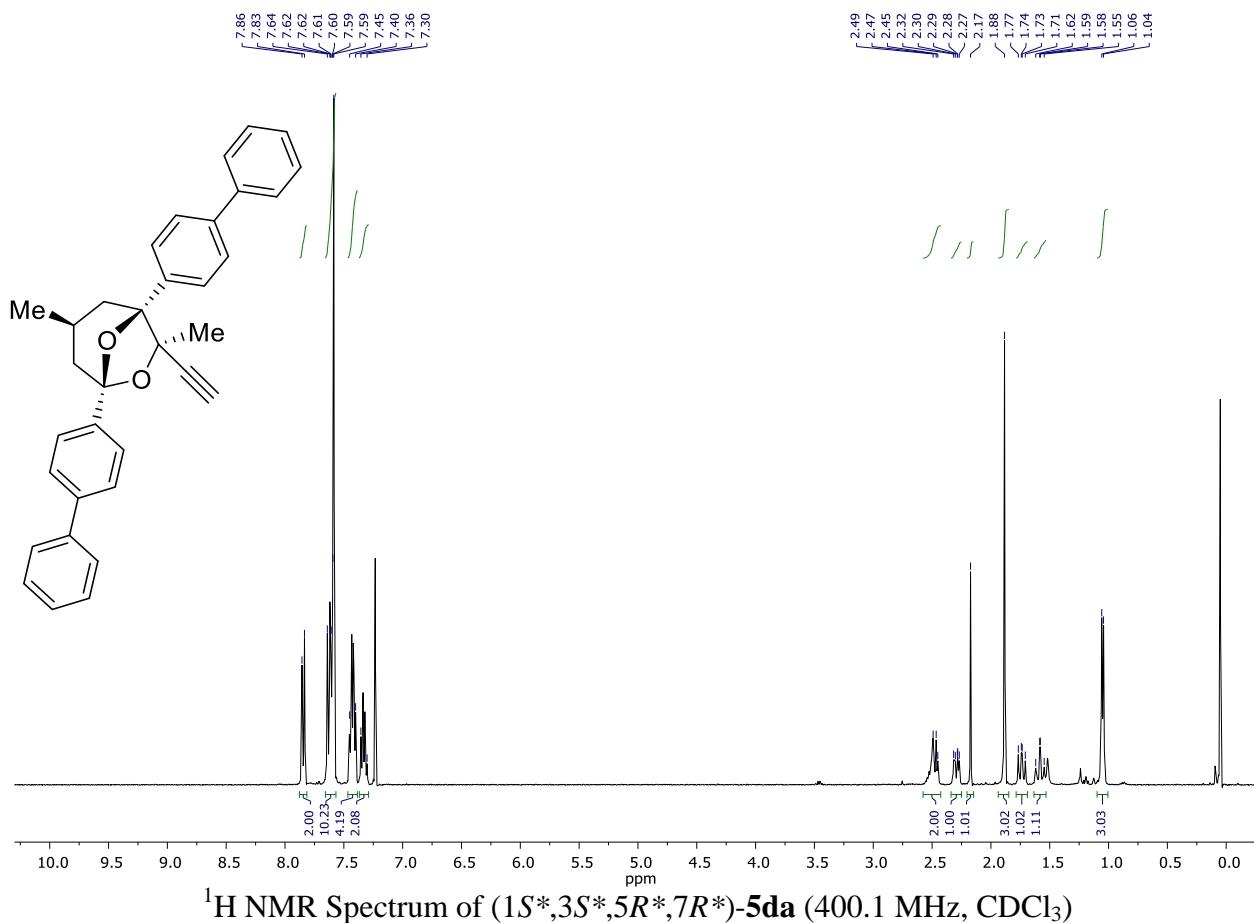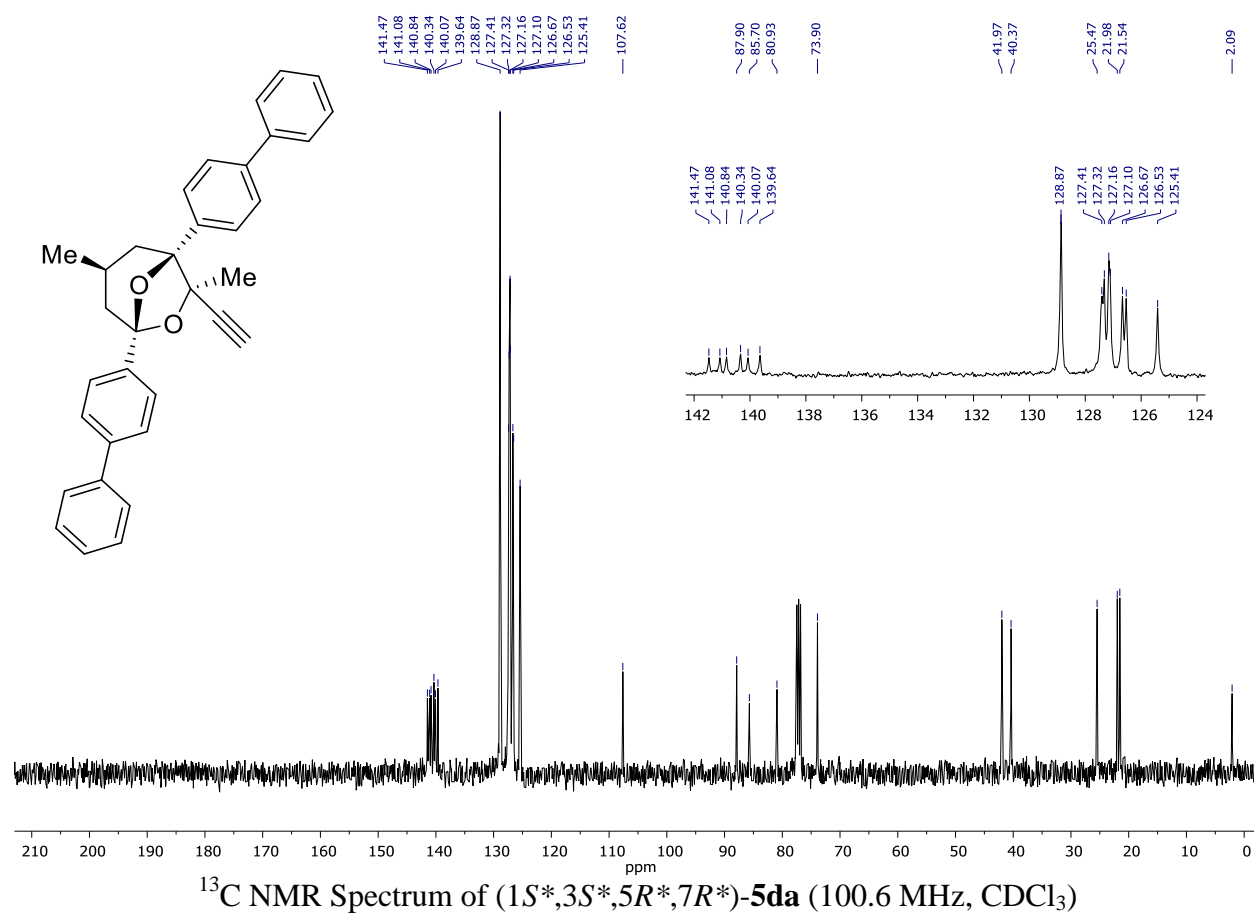

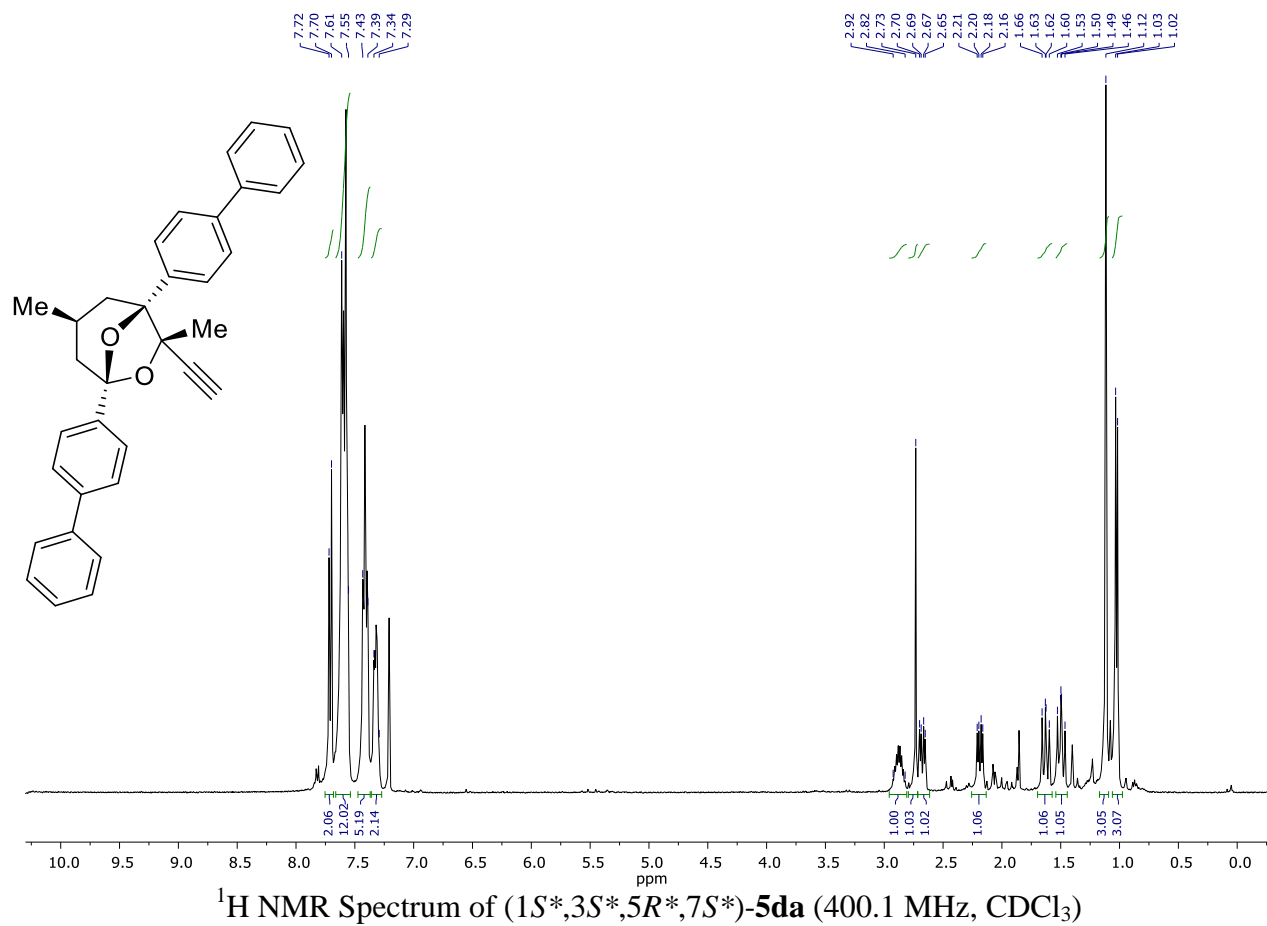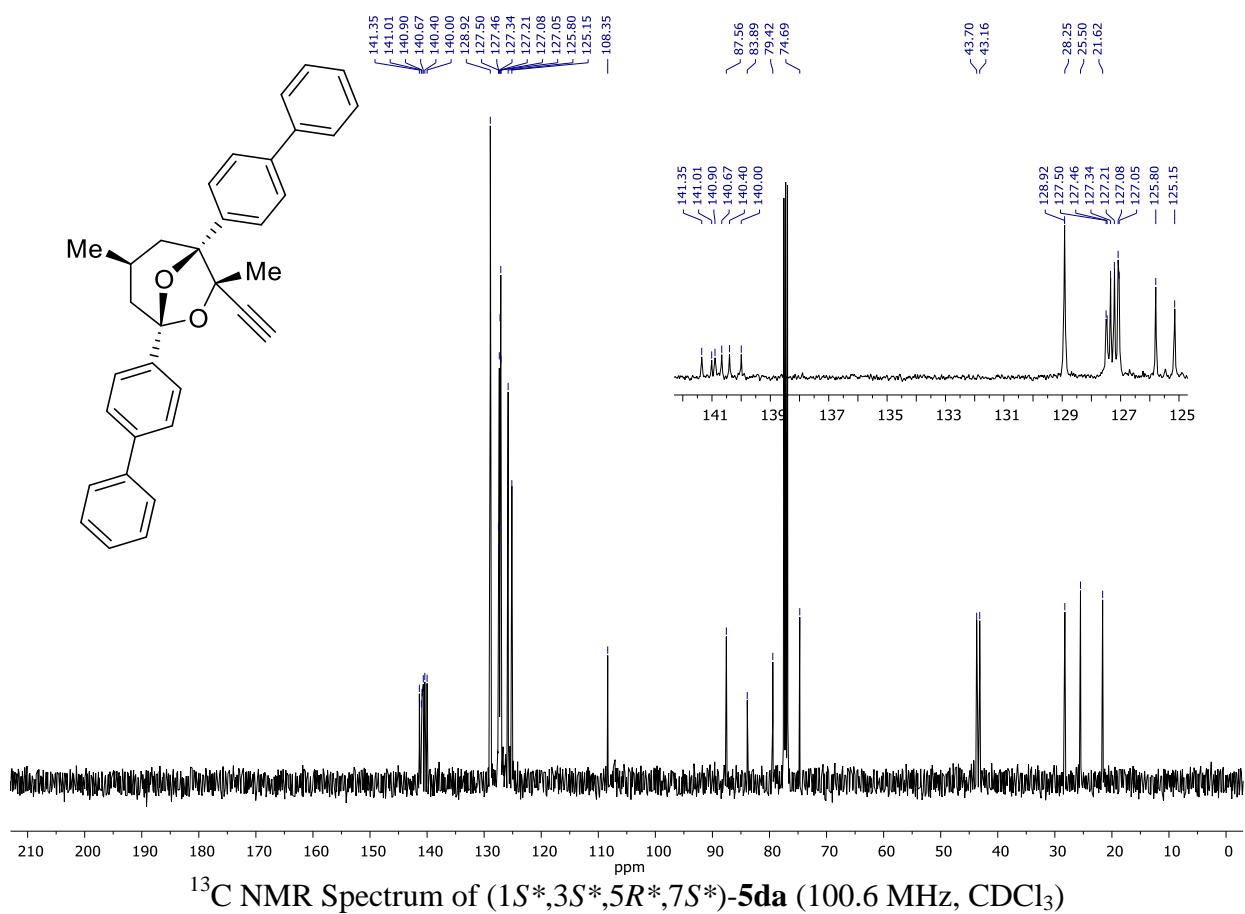



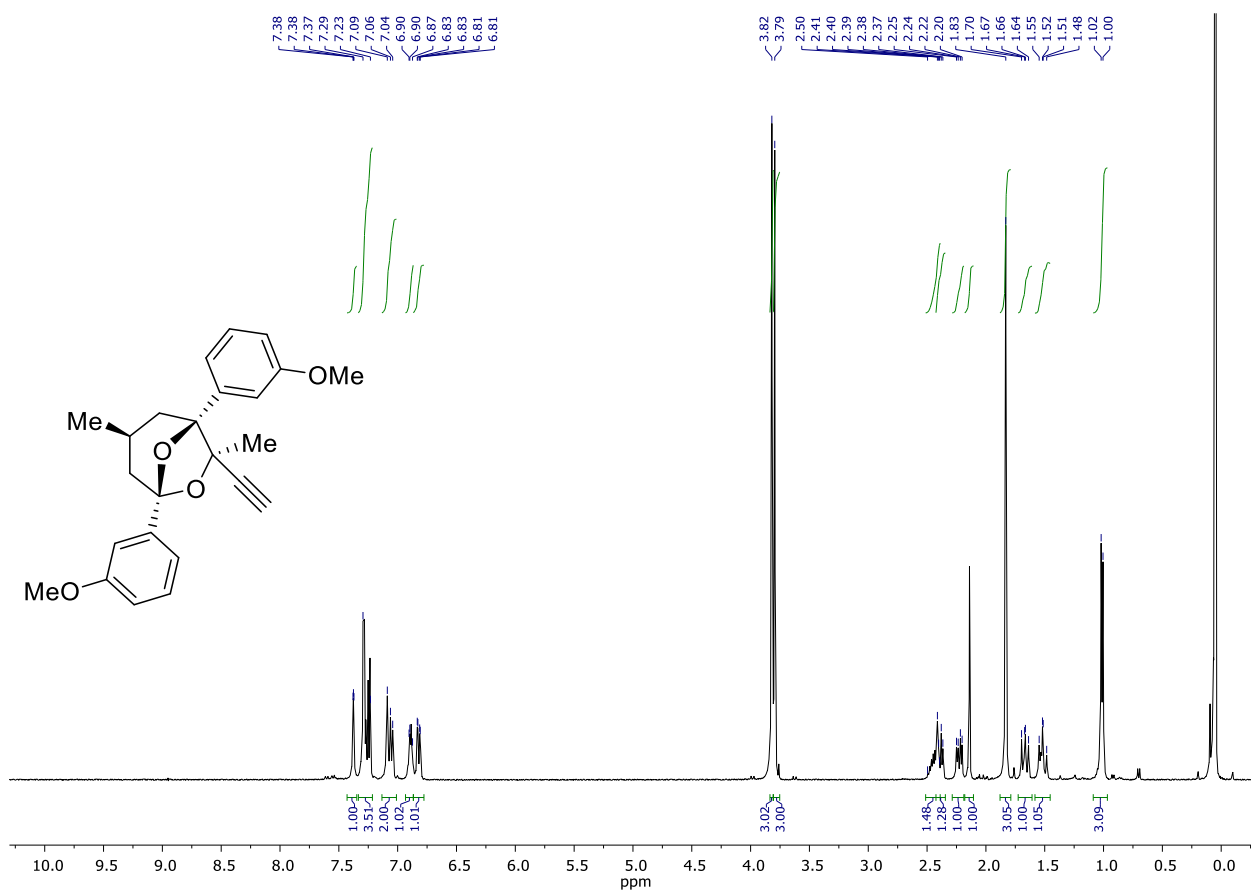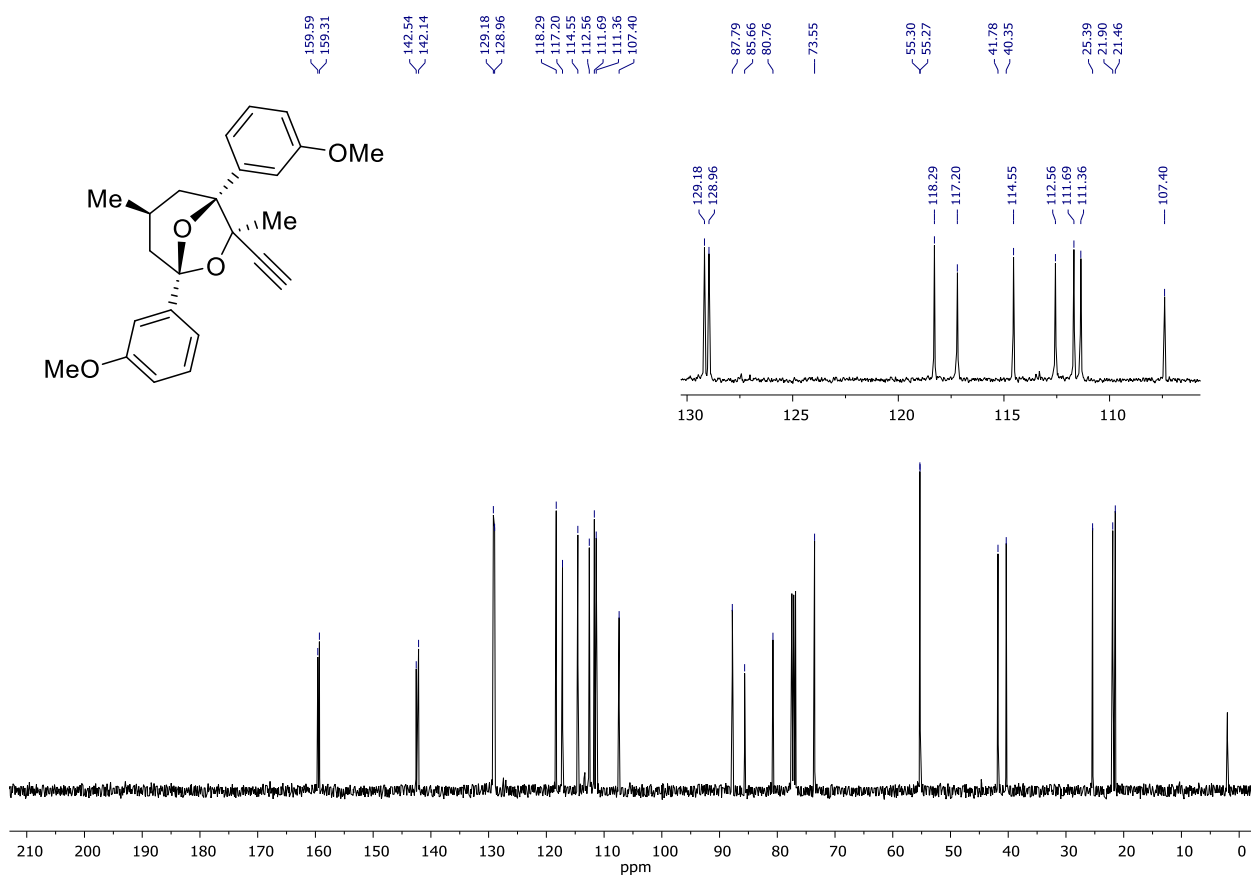

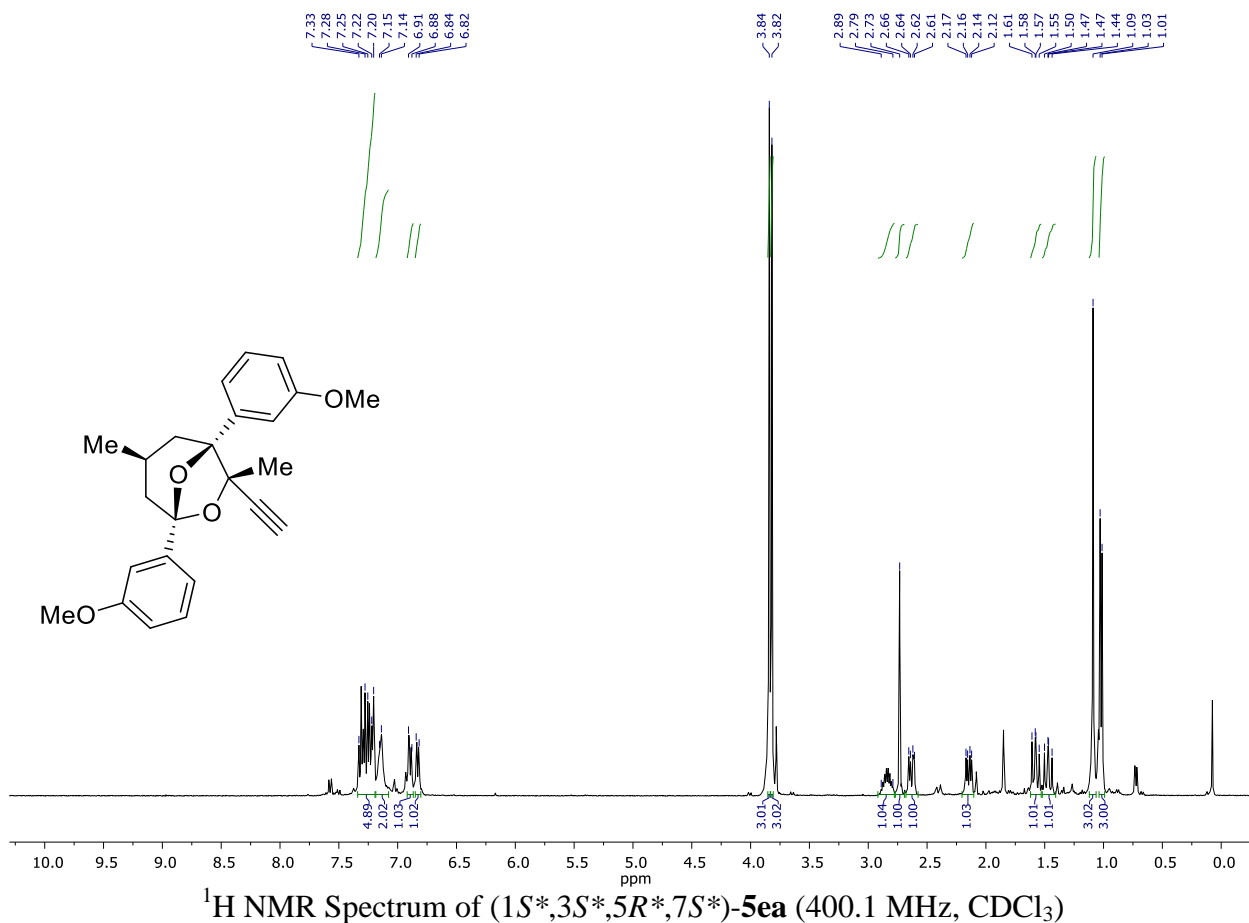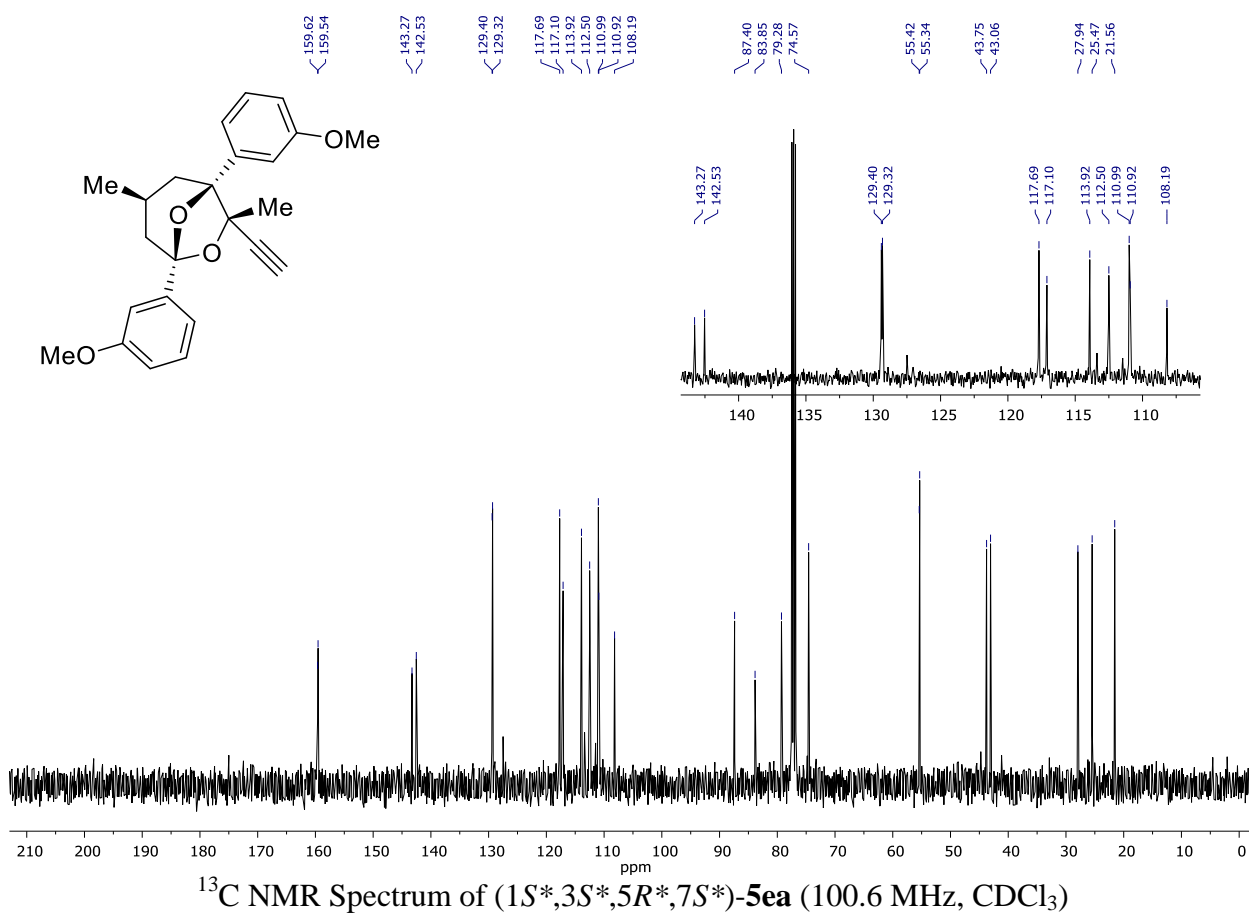

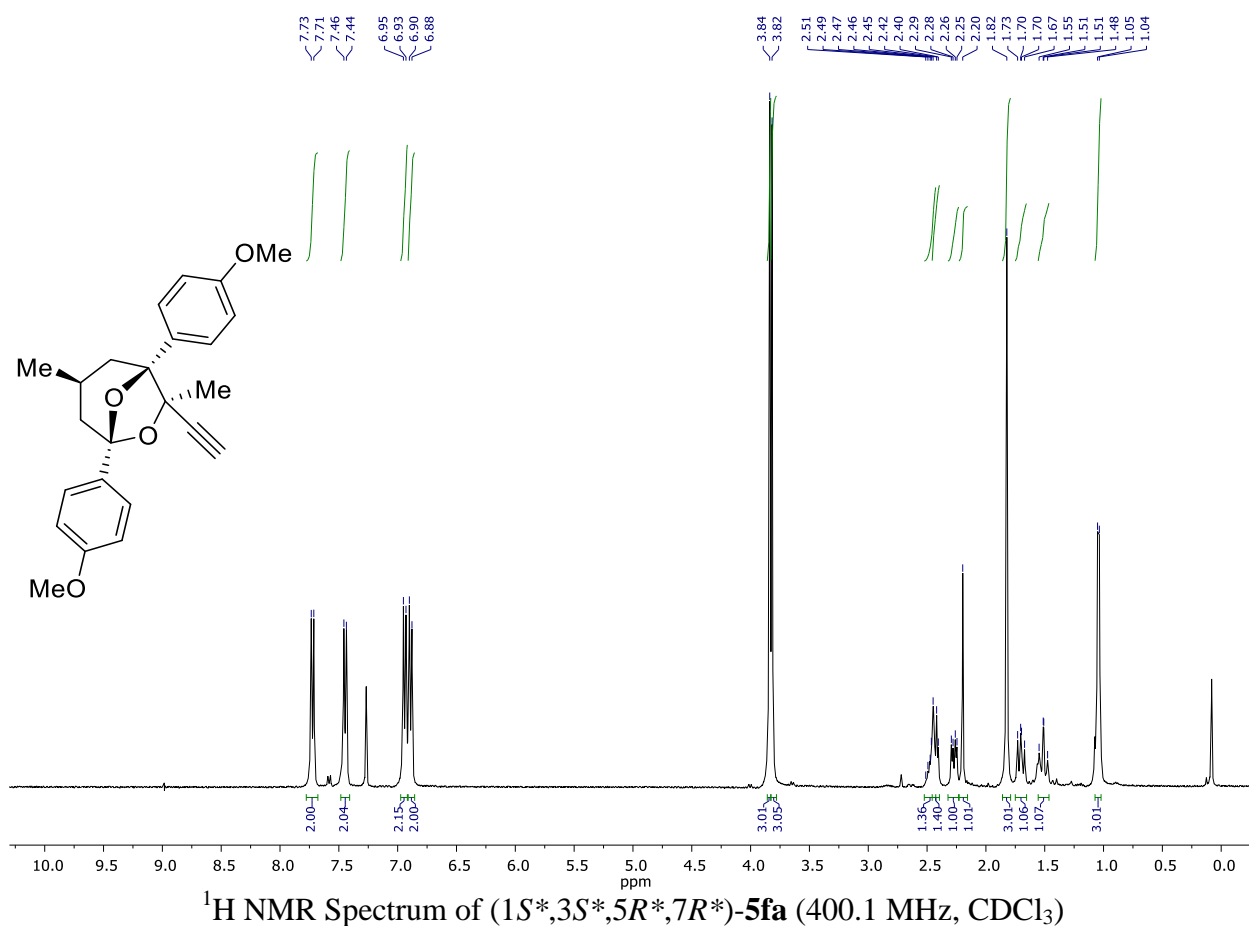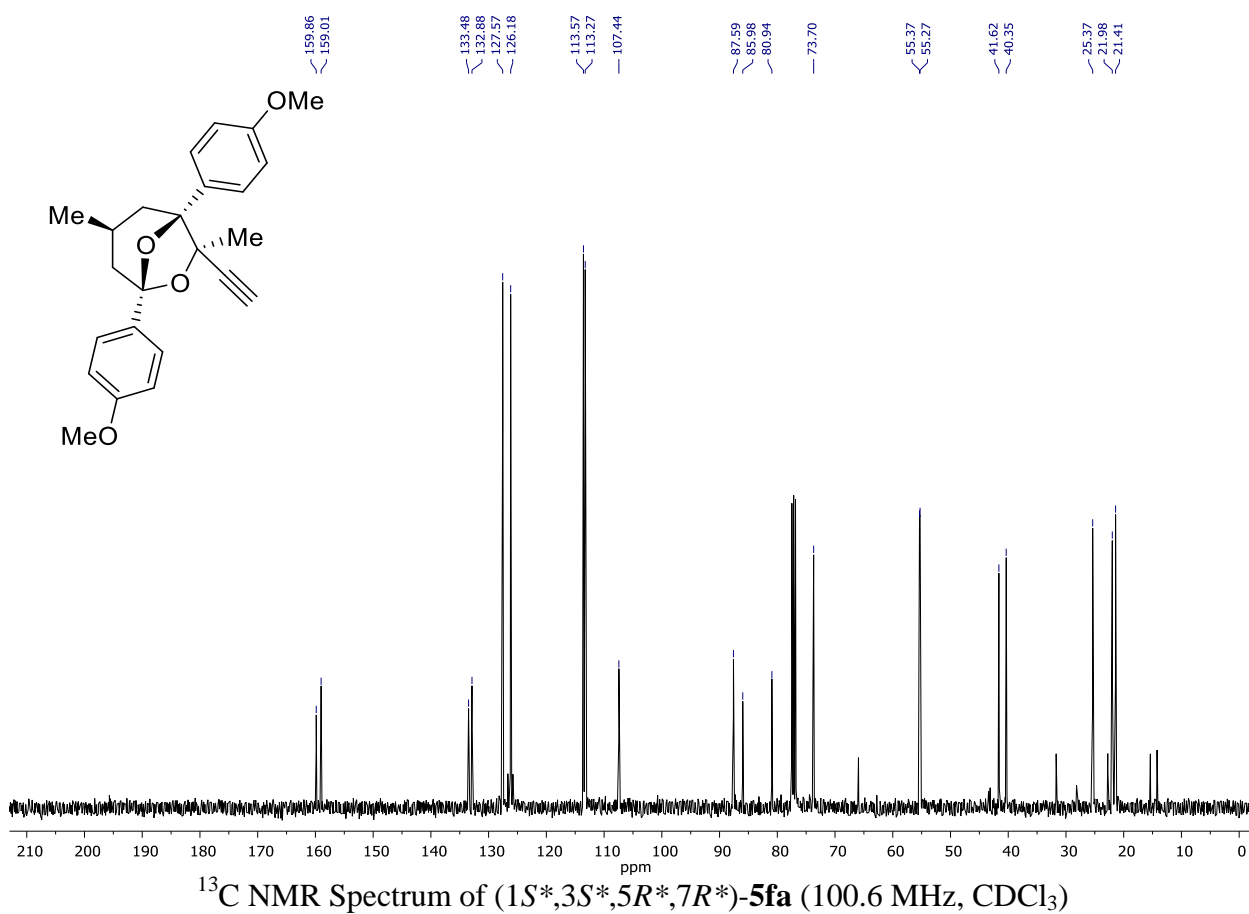

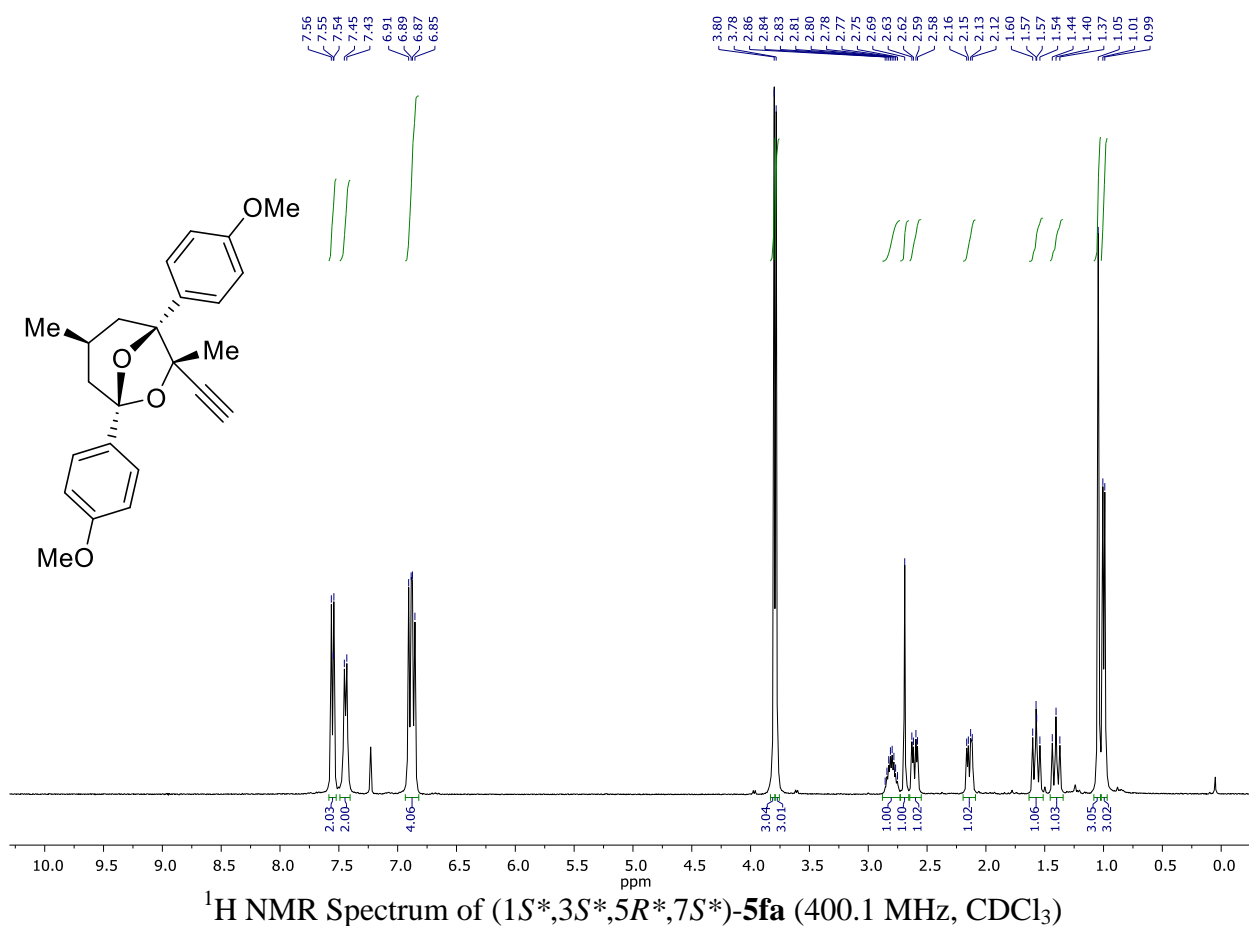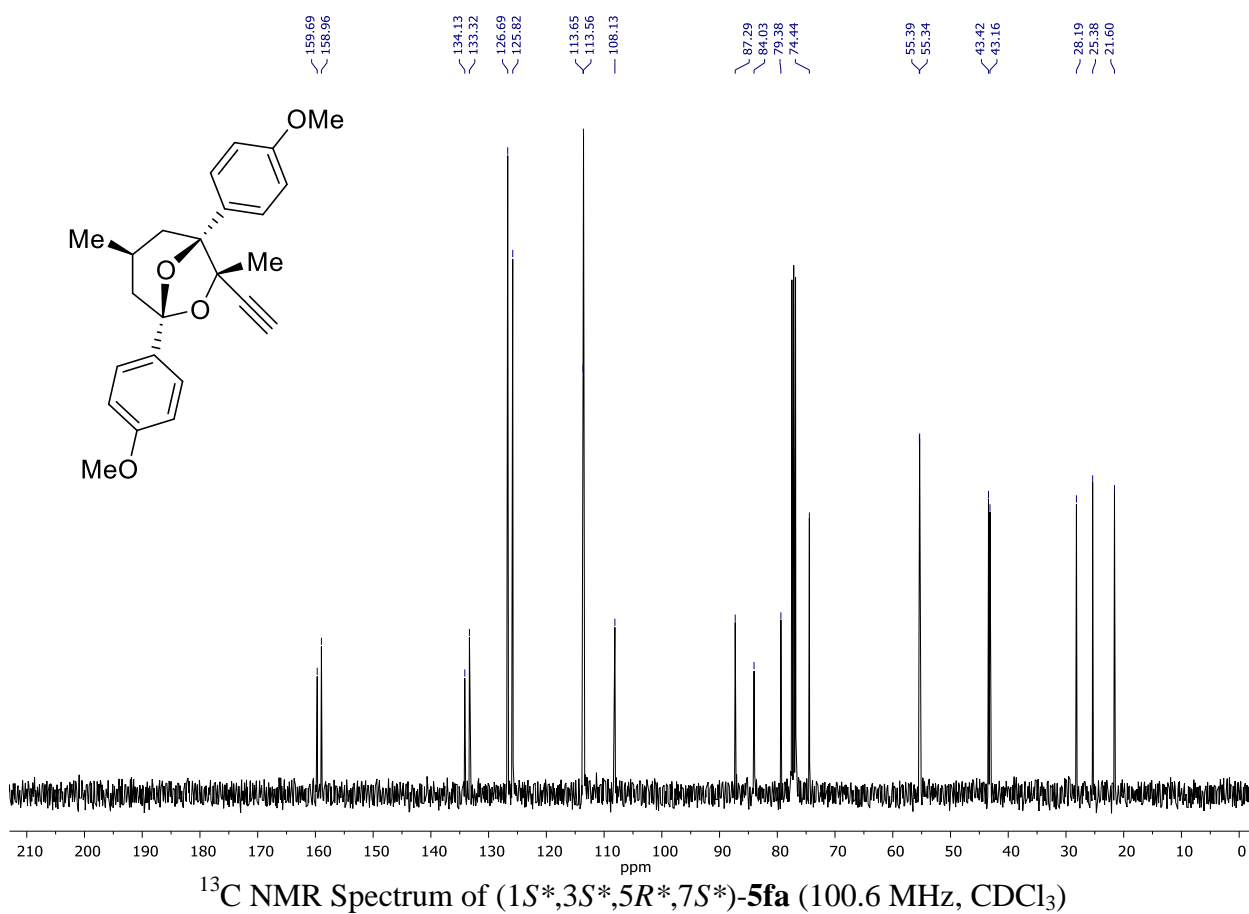

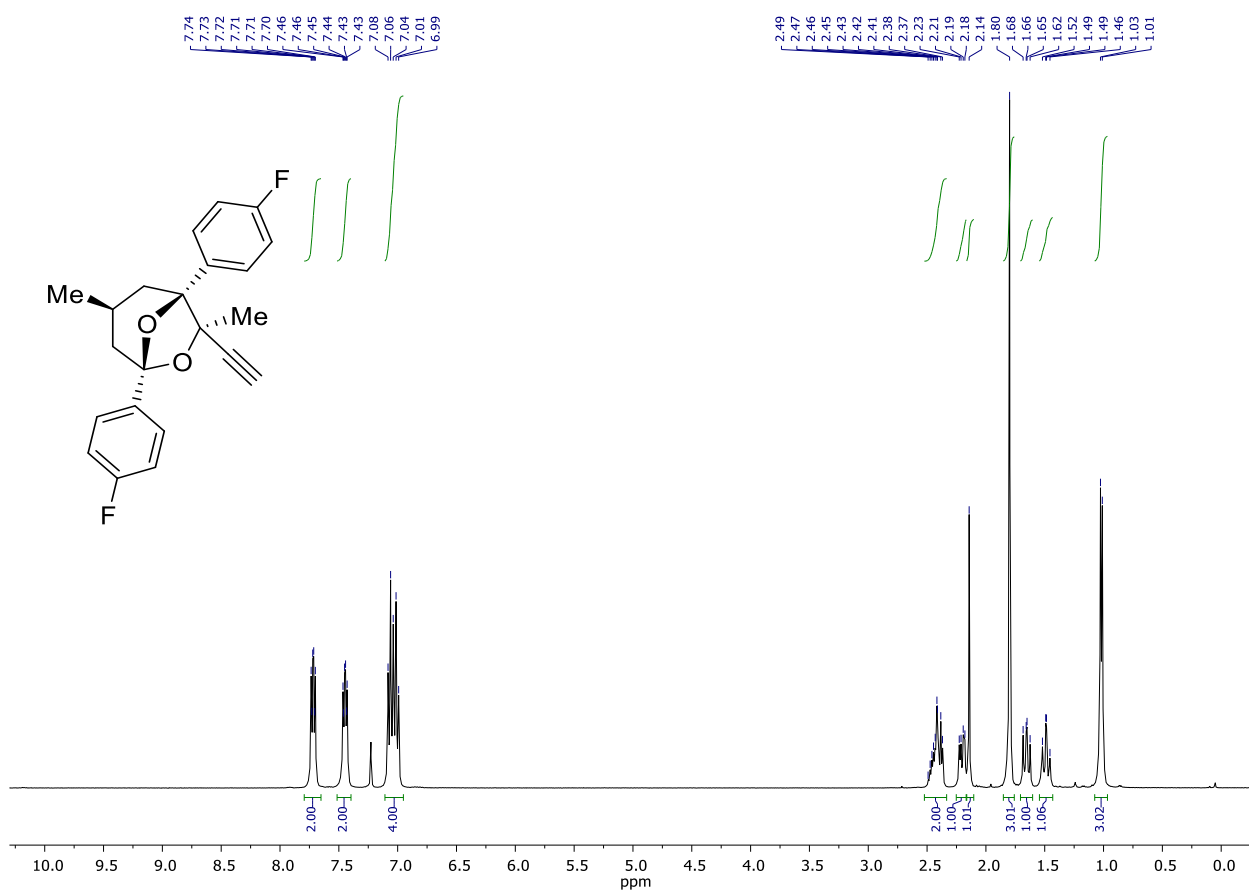

$^1\text{H NMR}$  Spectrum of  $(1S^*,3S^*,5R^*,7R^*)$ -**5ga** (400.1 MHz,  $\text{CDCl}_3$ )

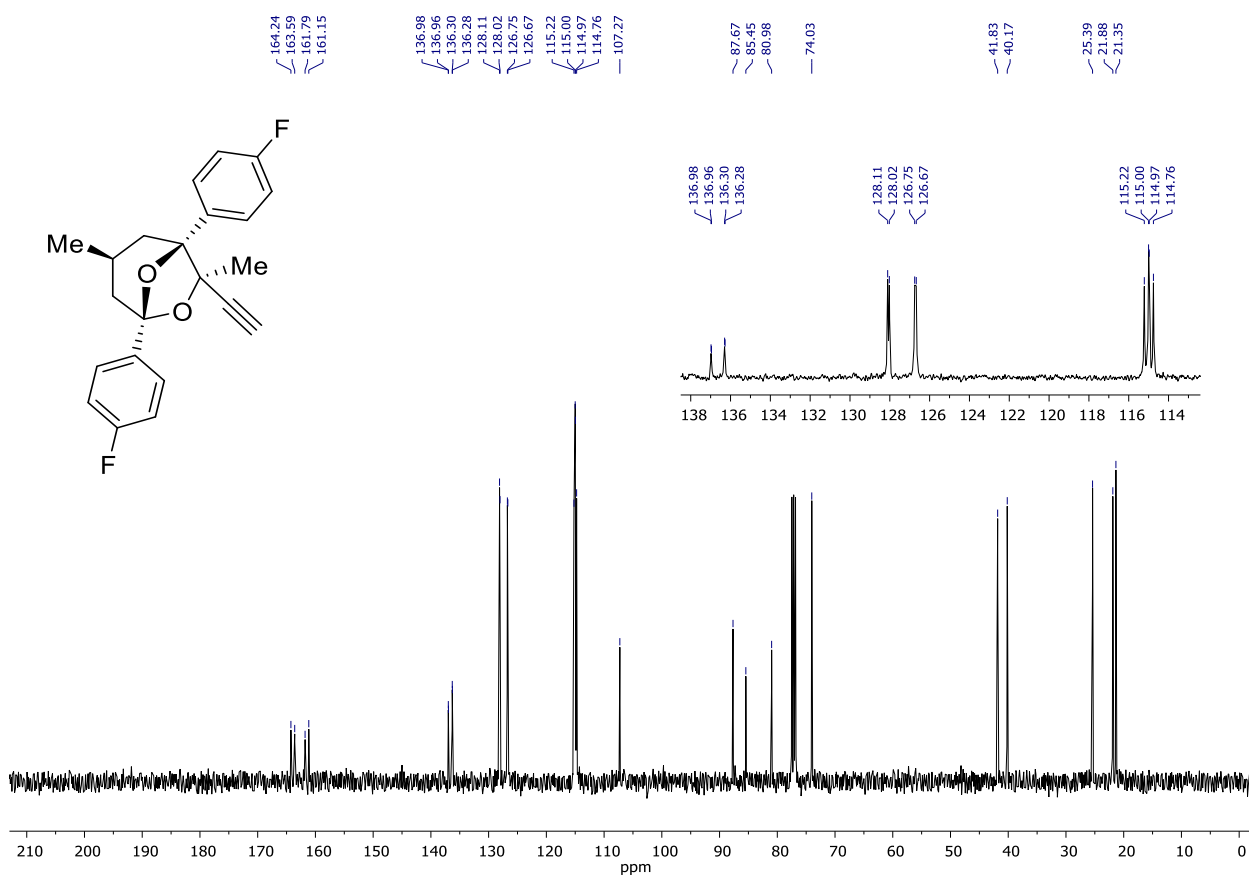

$^{13}\text{C NMR}$  Spectrum of  $(1S^*,3S^*,5R^*,7R^*)$ -**5ga** (100.6 MHz,  $\text{CDCl}_3$ )

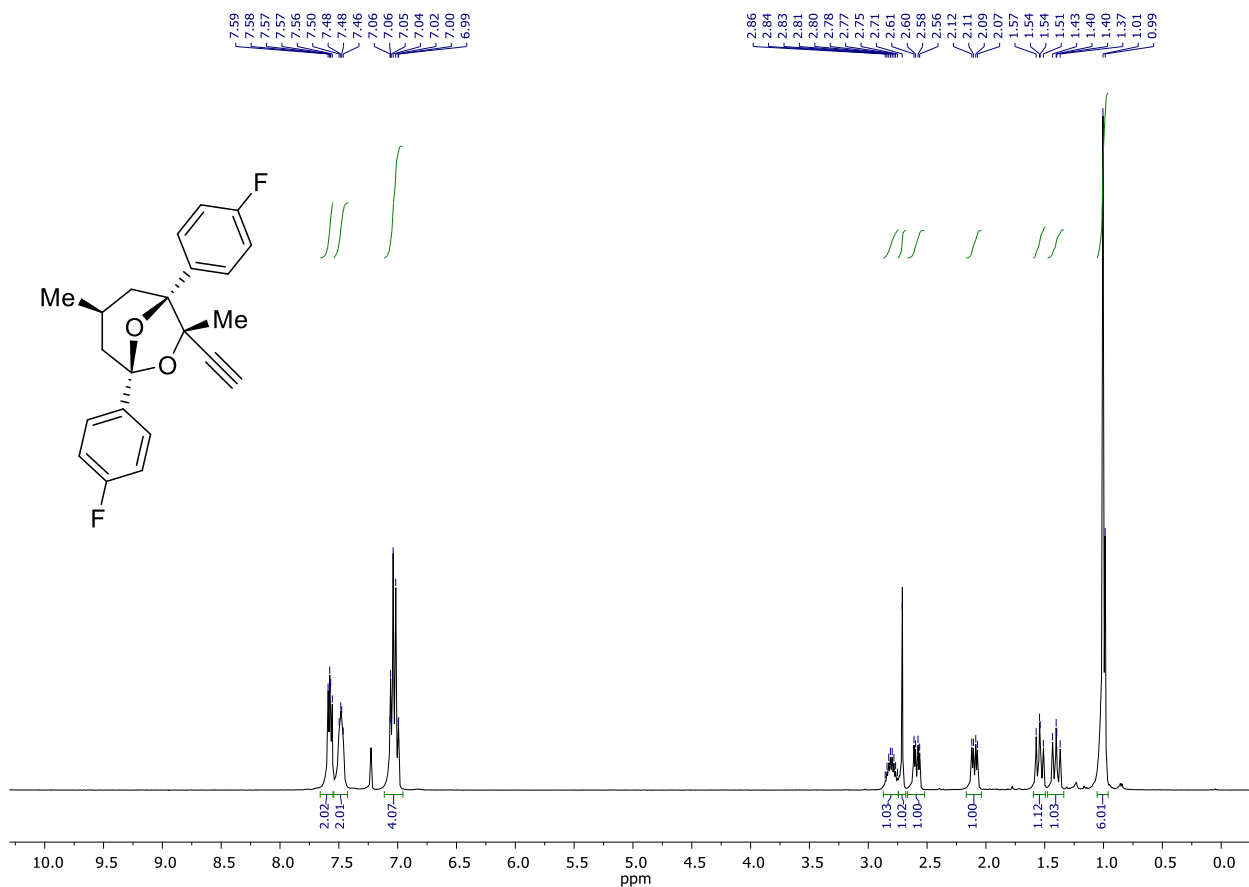

$^1\text{H}$  NMR Spectrum of  $(1S^*,3S^*,5R^*,7S^*)$ -**5ga** (400.1 MHz,  $\text{CDCl}_3$ )

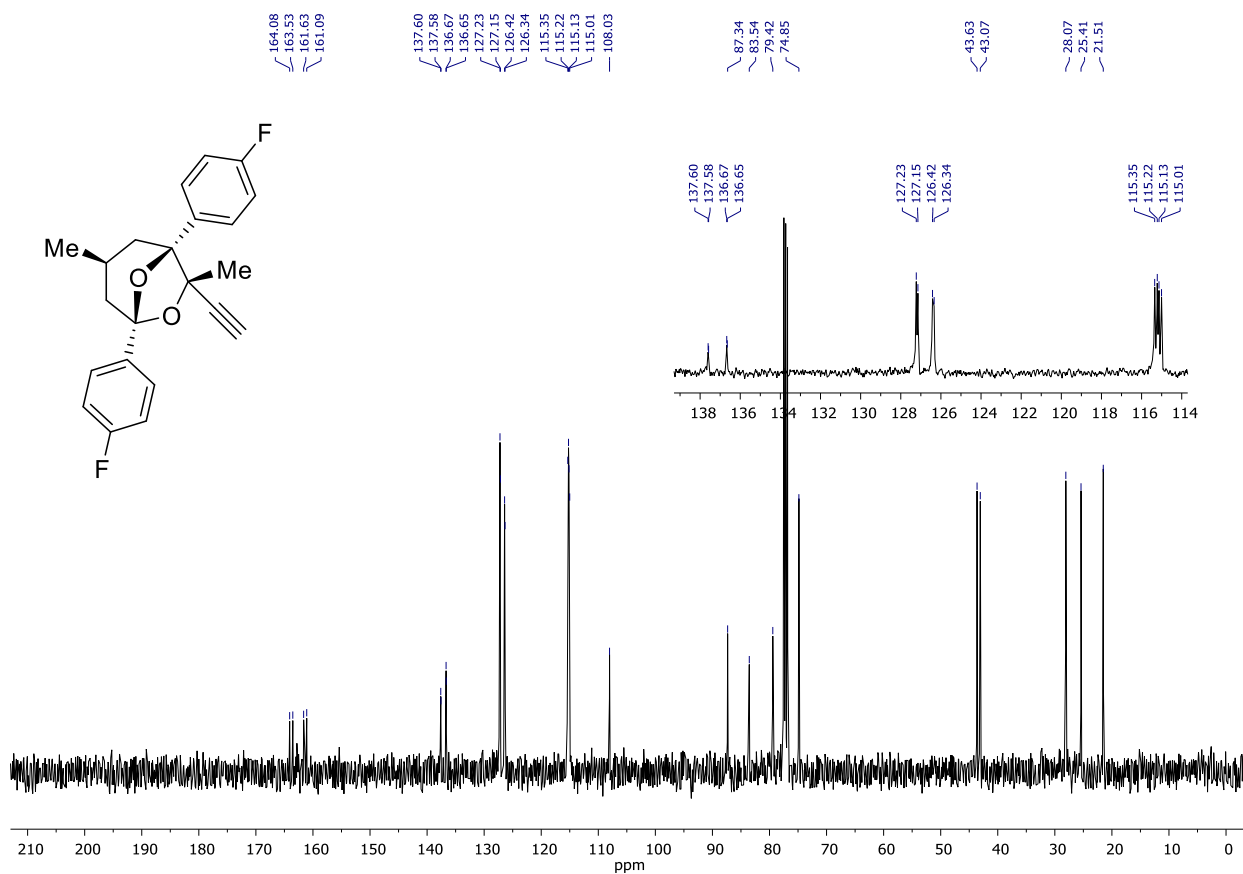

$^{13}\text{C}$  NMR Spectrum of  $(1S^*,3S^*,5R^*,7S^*)$ -**5ga** (100.6 MHz,  $\text{CDCl}_3$ )

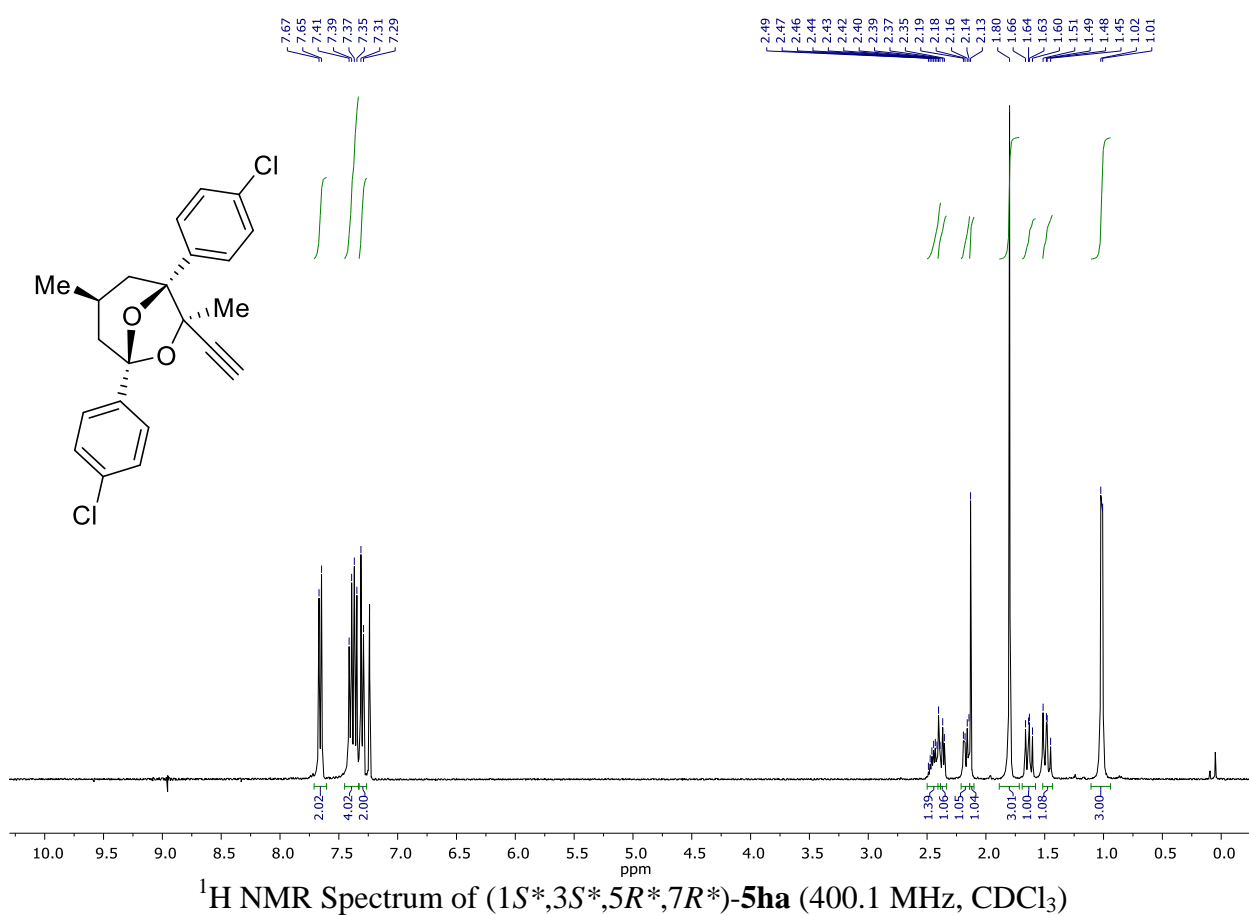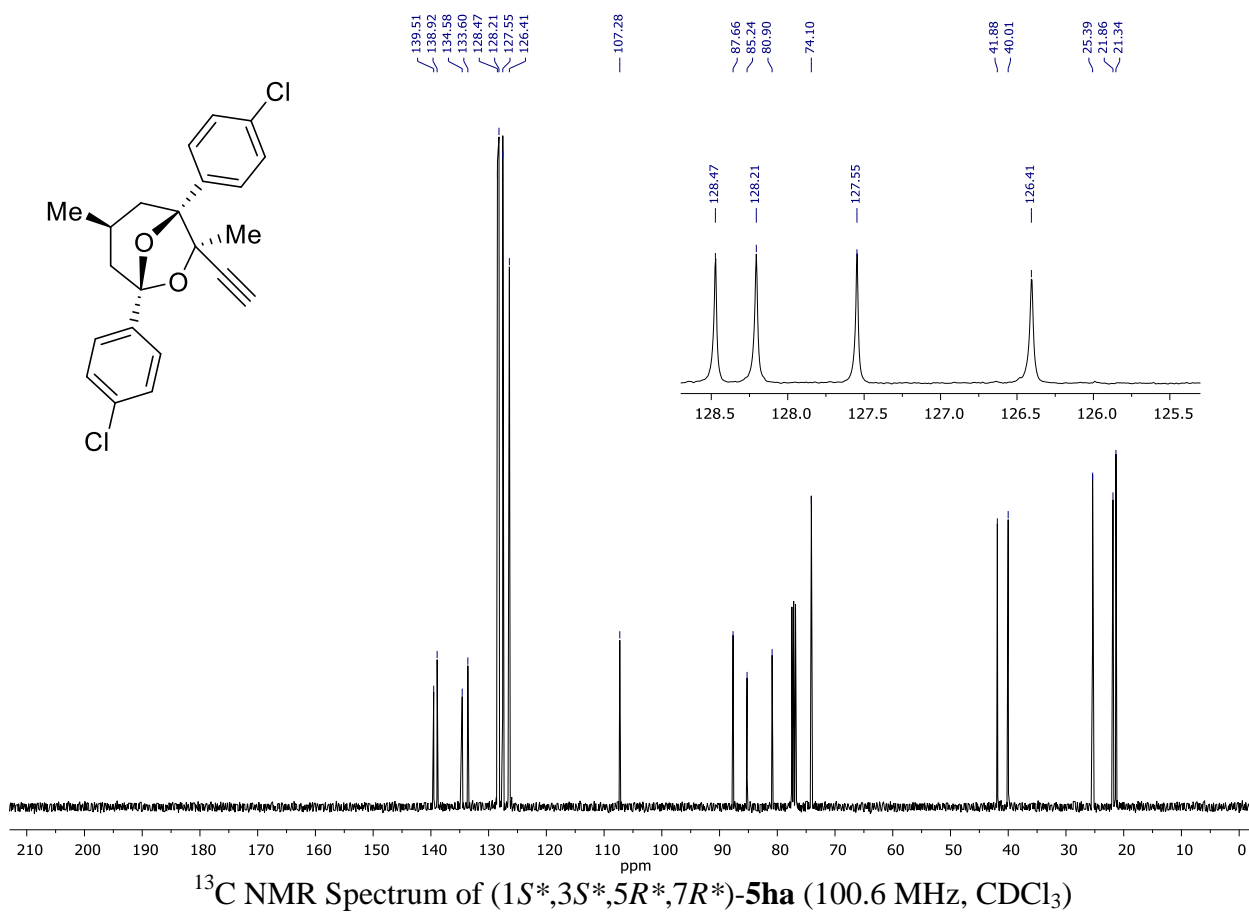

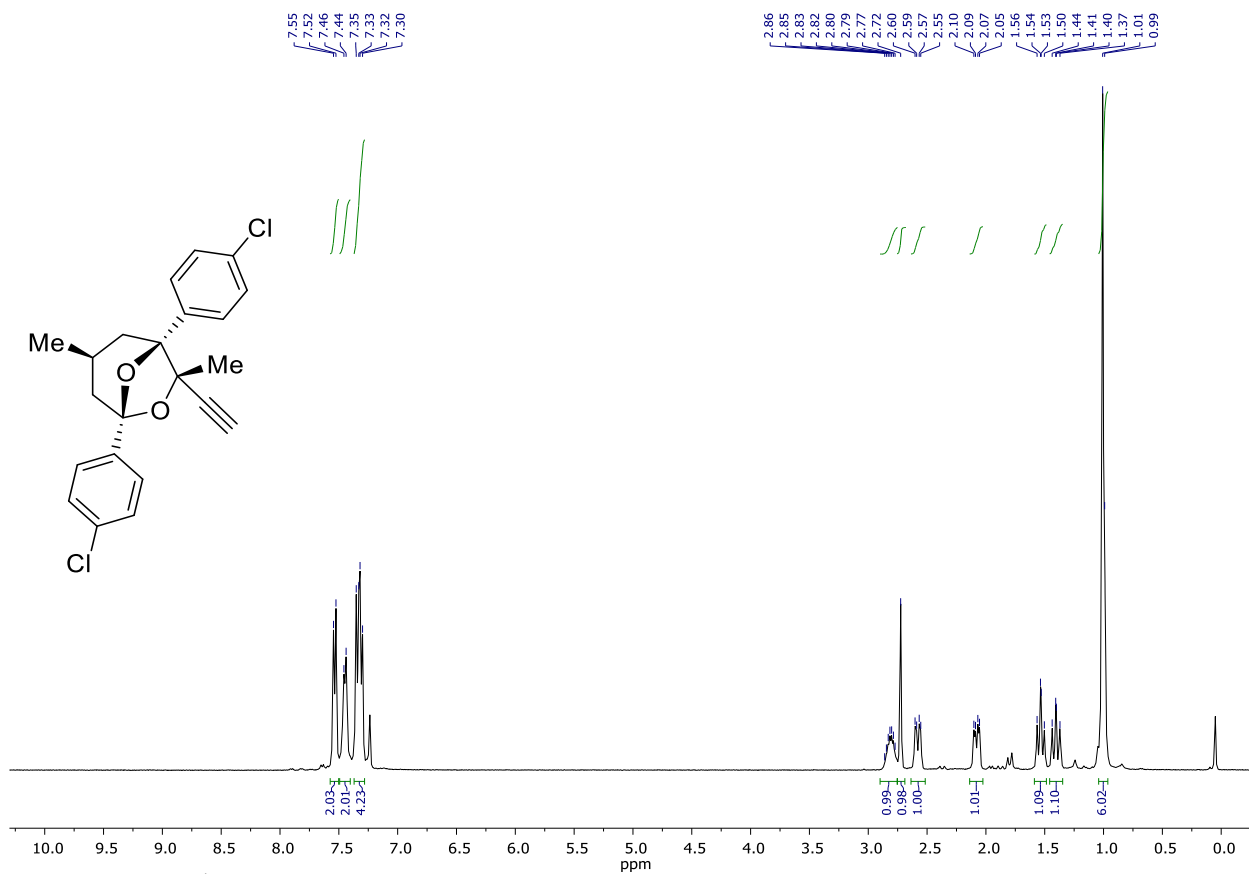

**<sup>1</sup>H NMR Spectrum of (1*S*\*,3*S*\*,5*R*\*,7*S*\*)-5ha (400.1 MHz, CDCl<sub>3</sub>)**

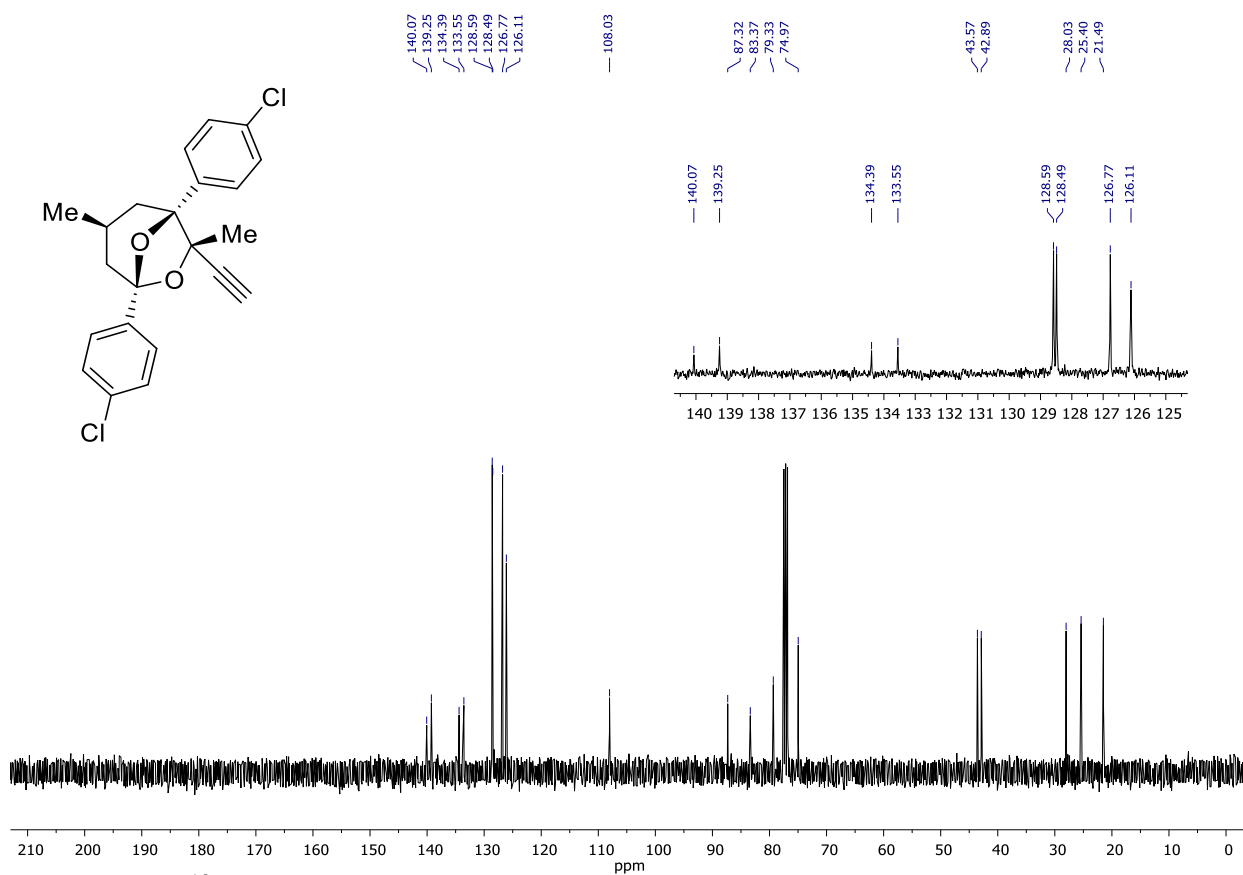

**<sup>13</sup>C NMR Spectrum of (1*S*\*,3*S*\*,5*R*\*,7*S*\*)-5ha (100.6 MHz, CDCl<sub>3</sub>)**



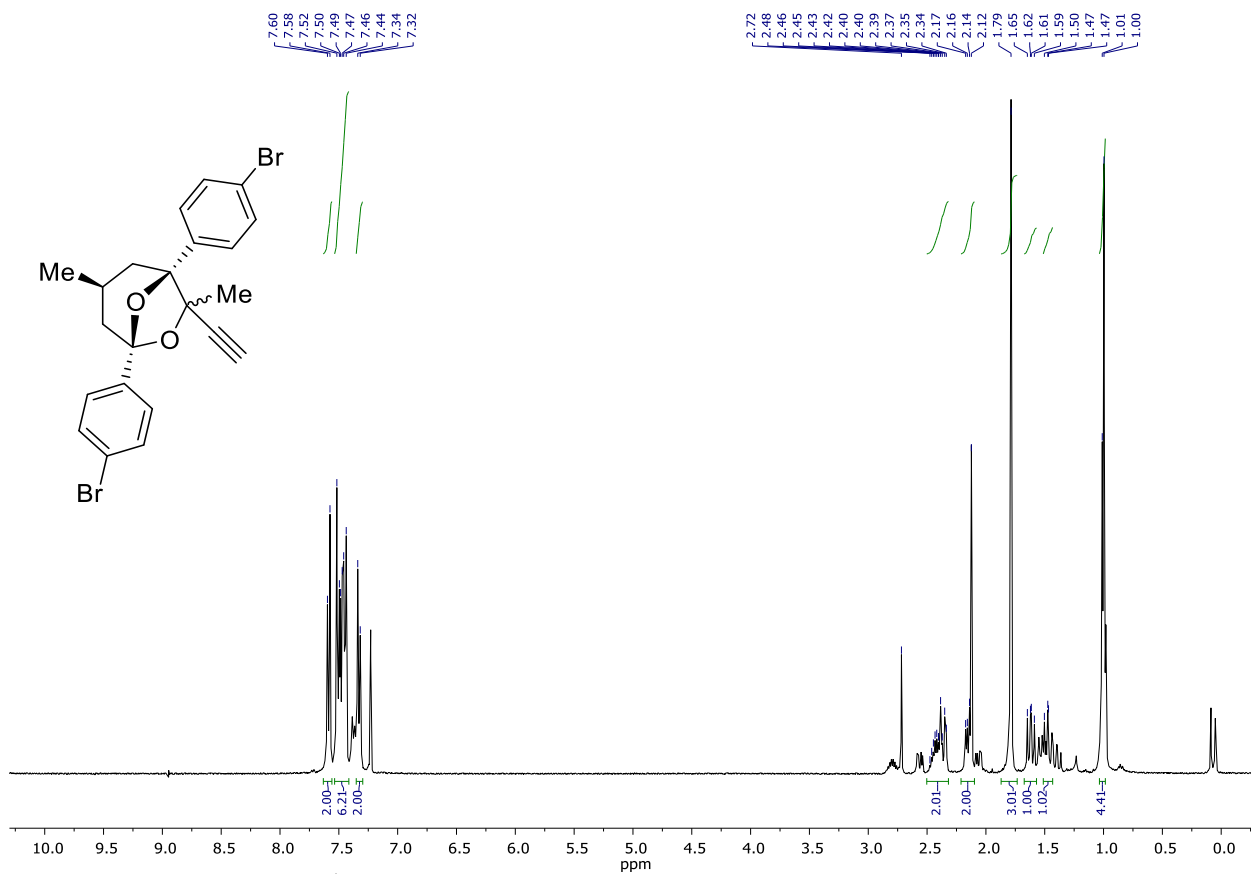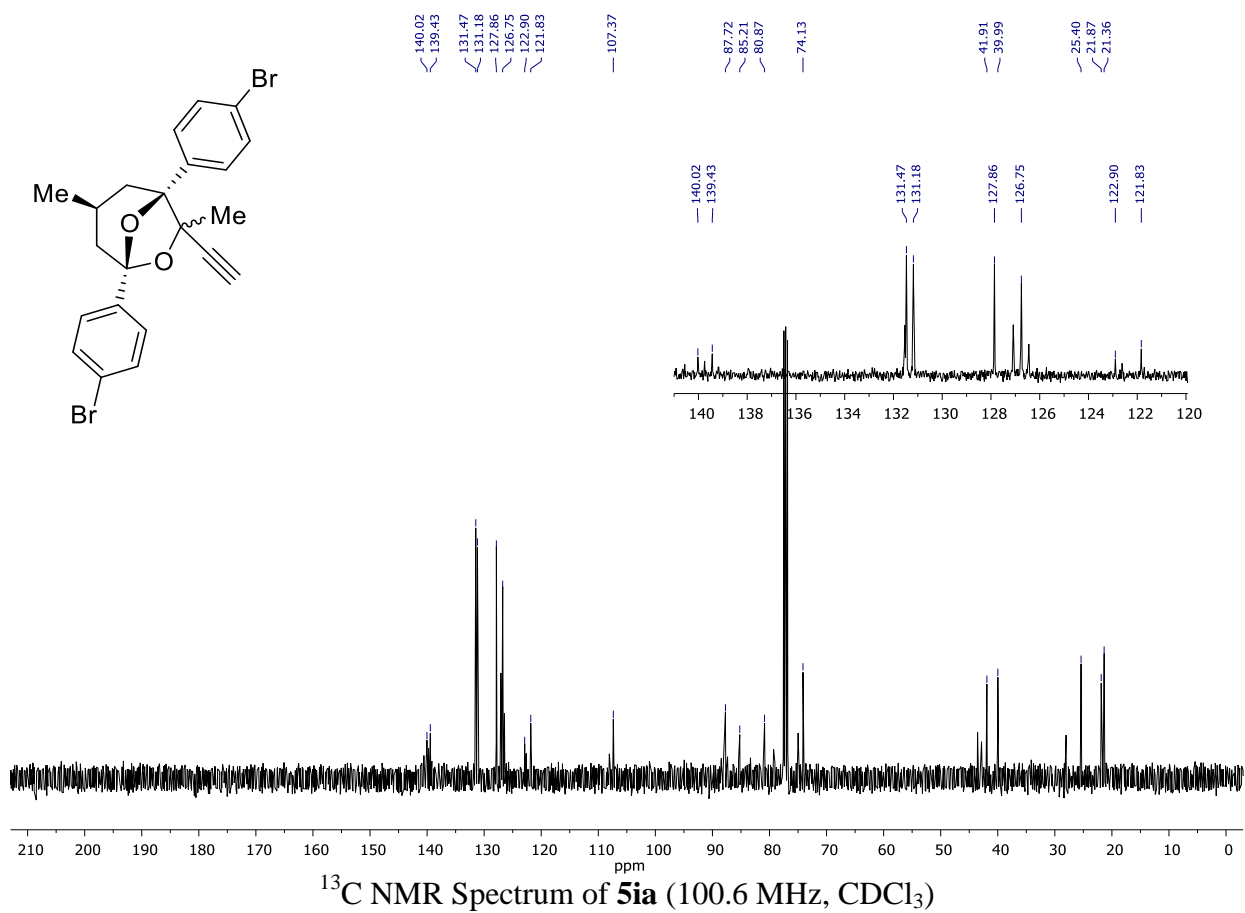

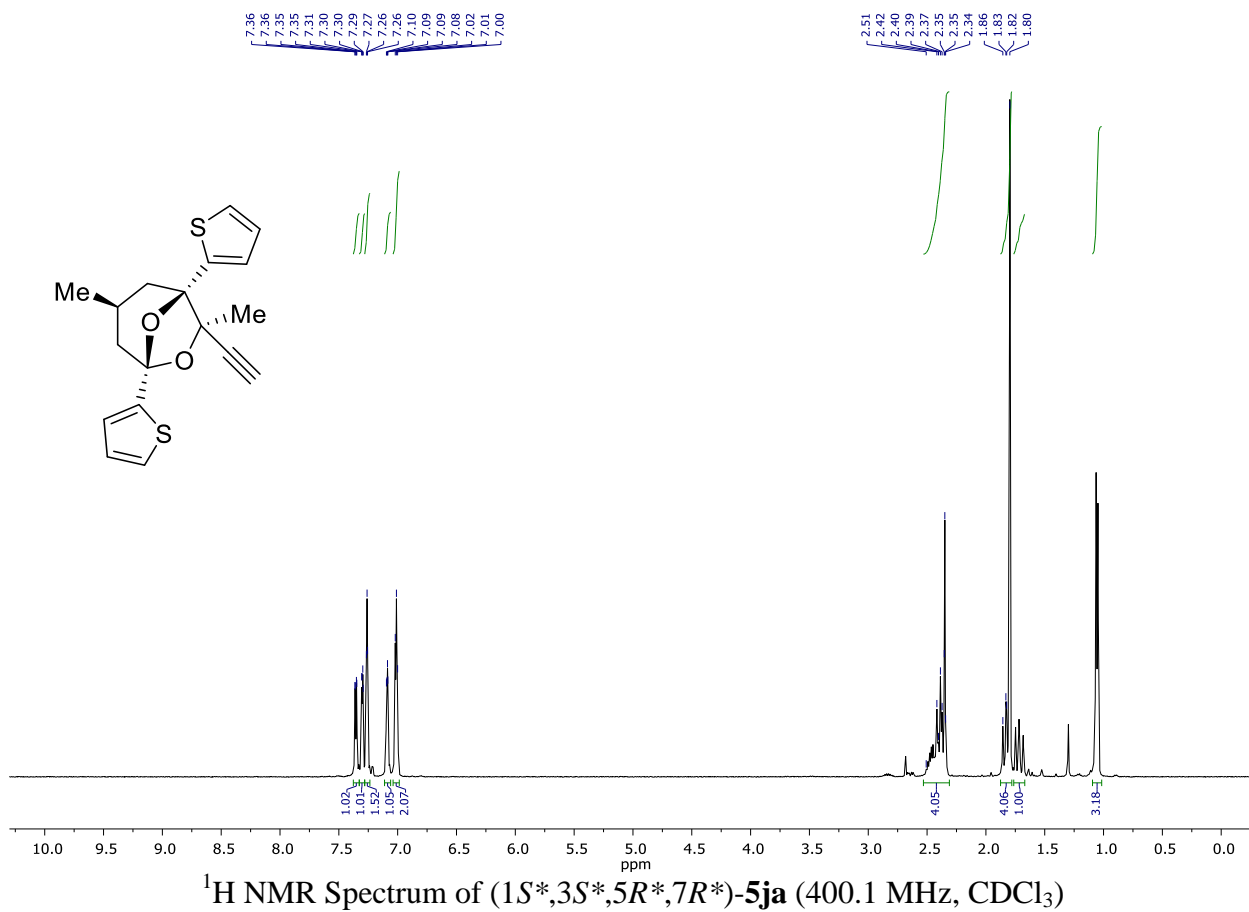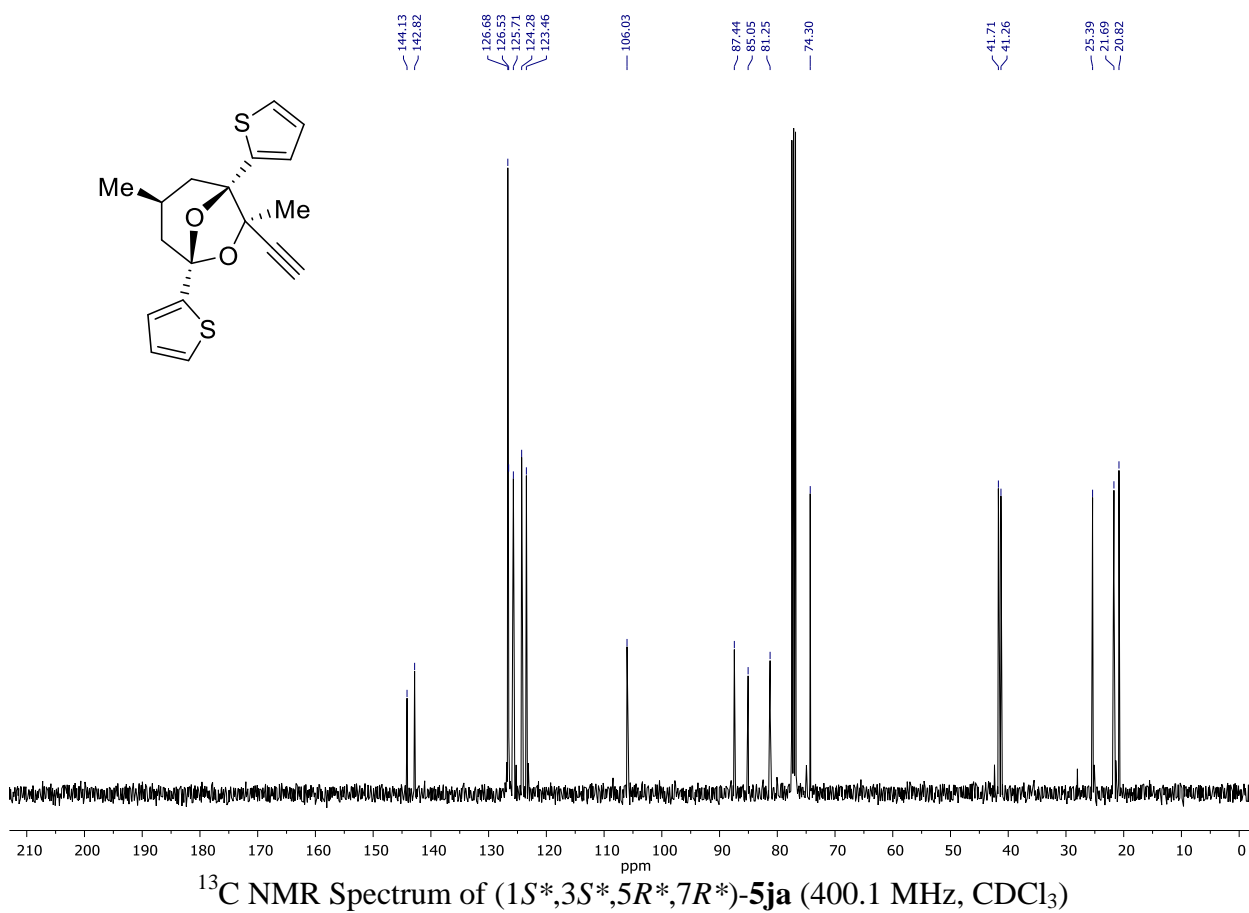

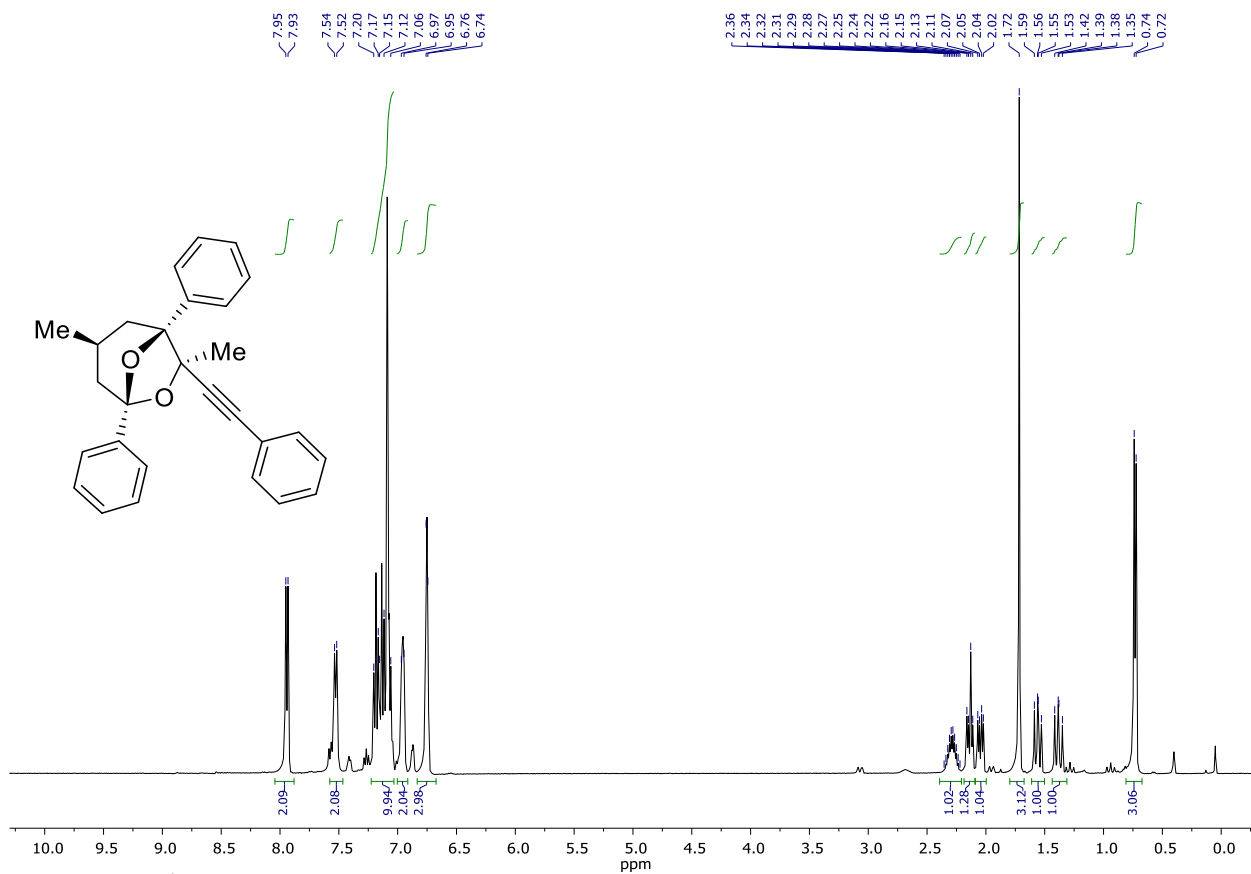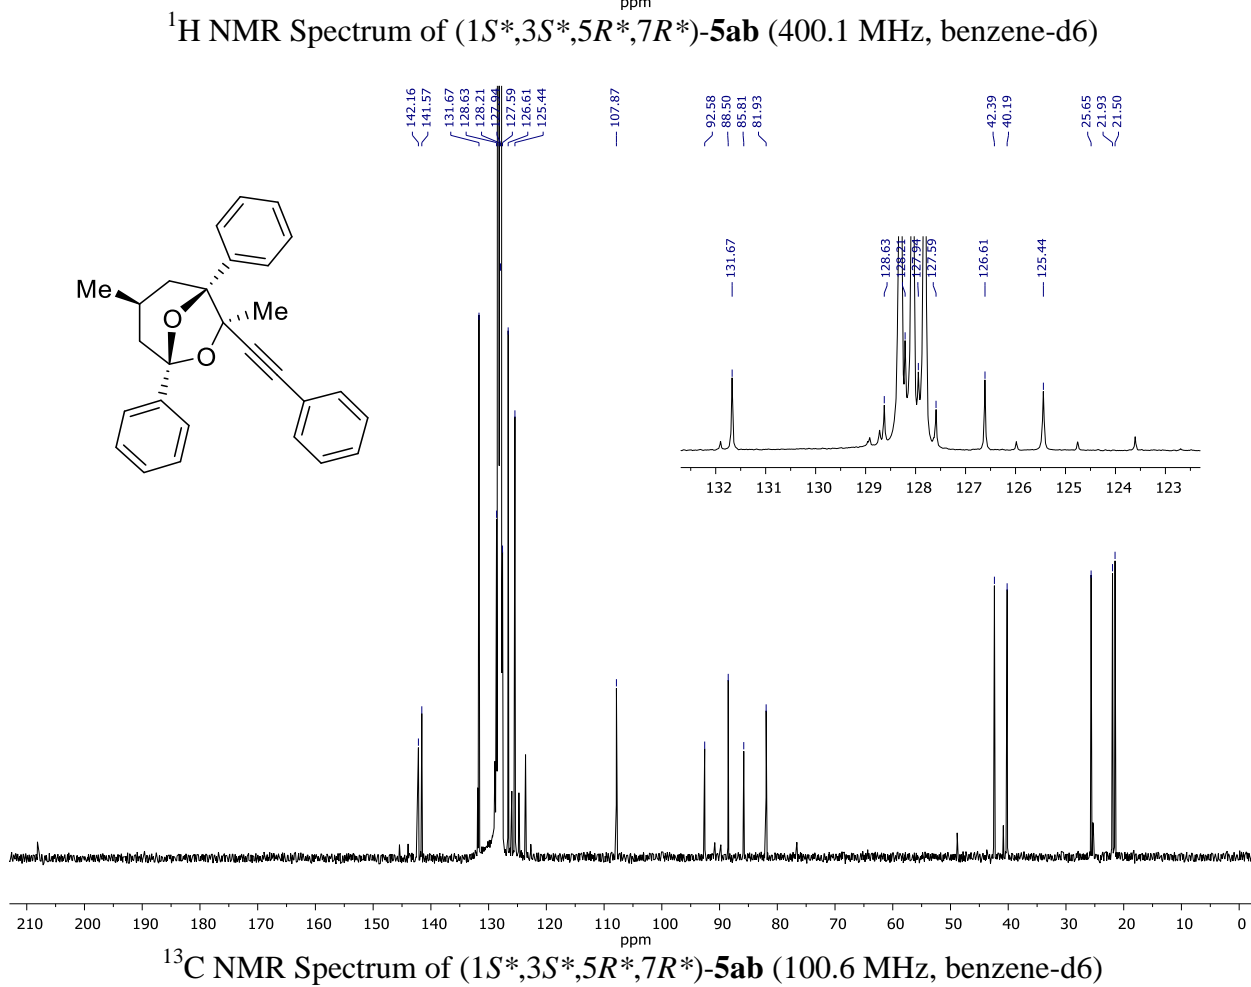

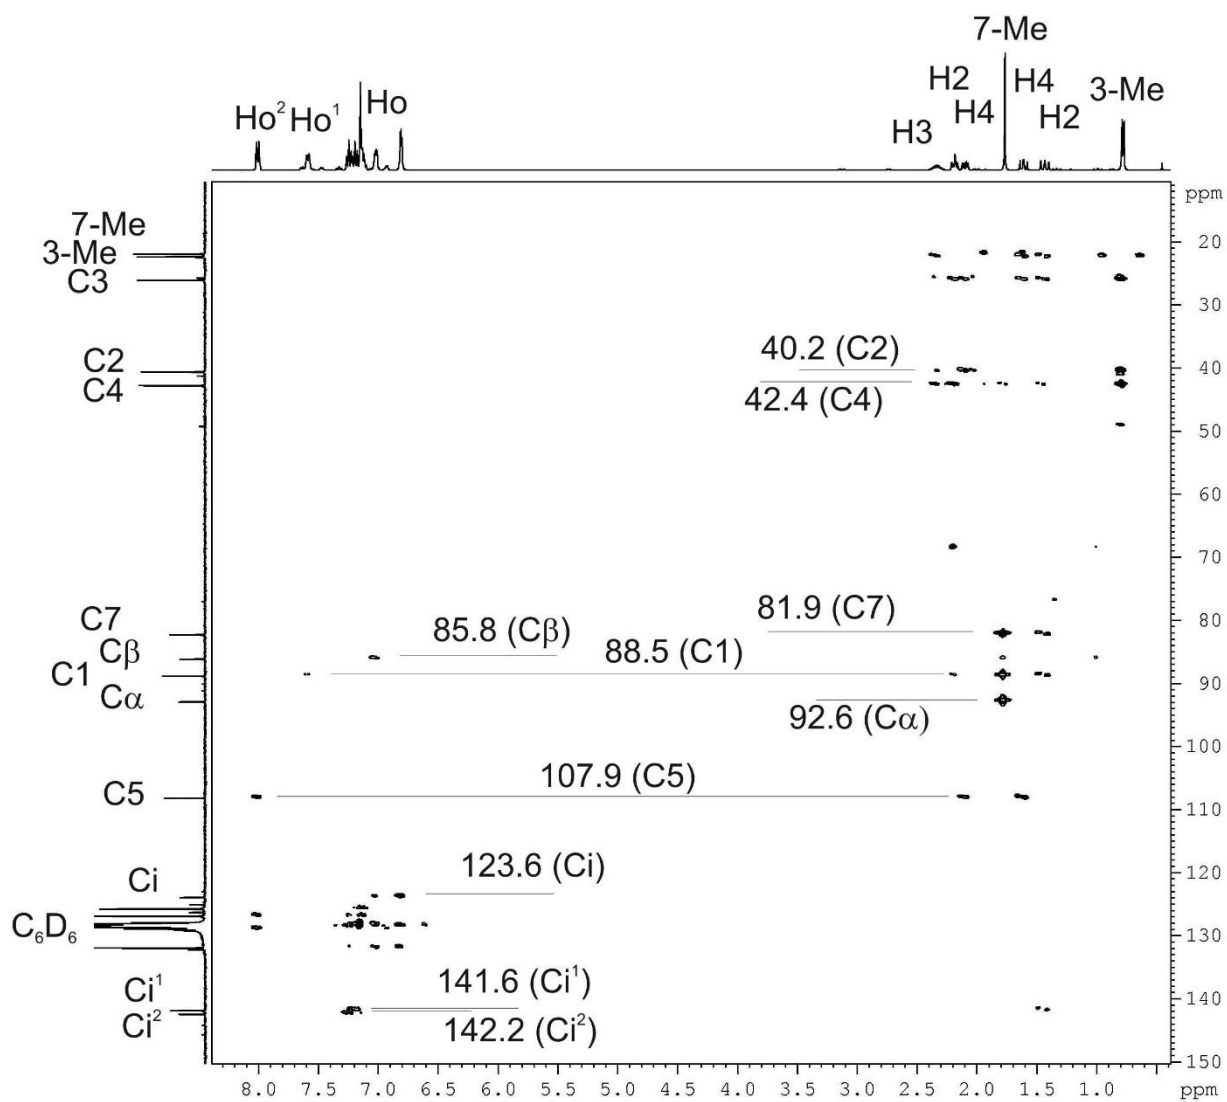

2D  $^1\text{H}$ - $^{13}\text{C}$  HMBC Spectrum of (1*S*\*,3*S*\*,5*R*\*,7*R*\*)-5ab.

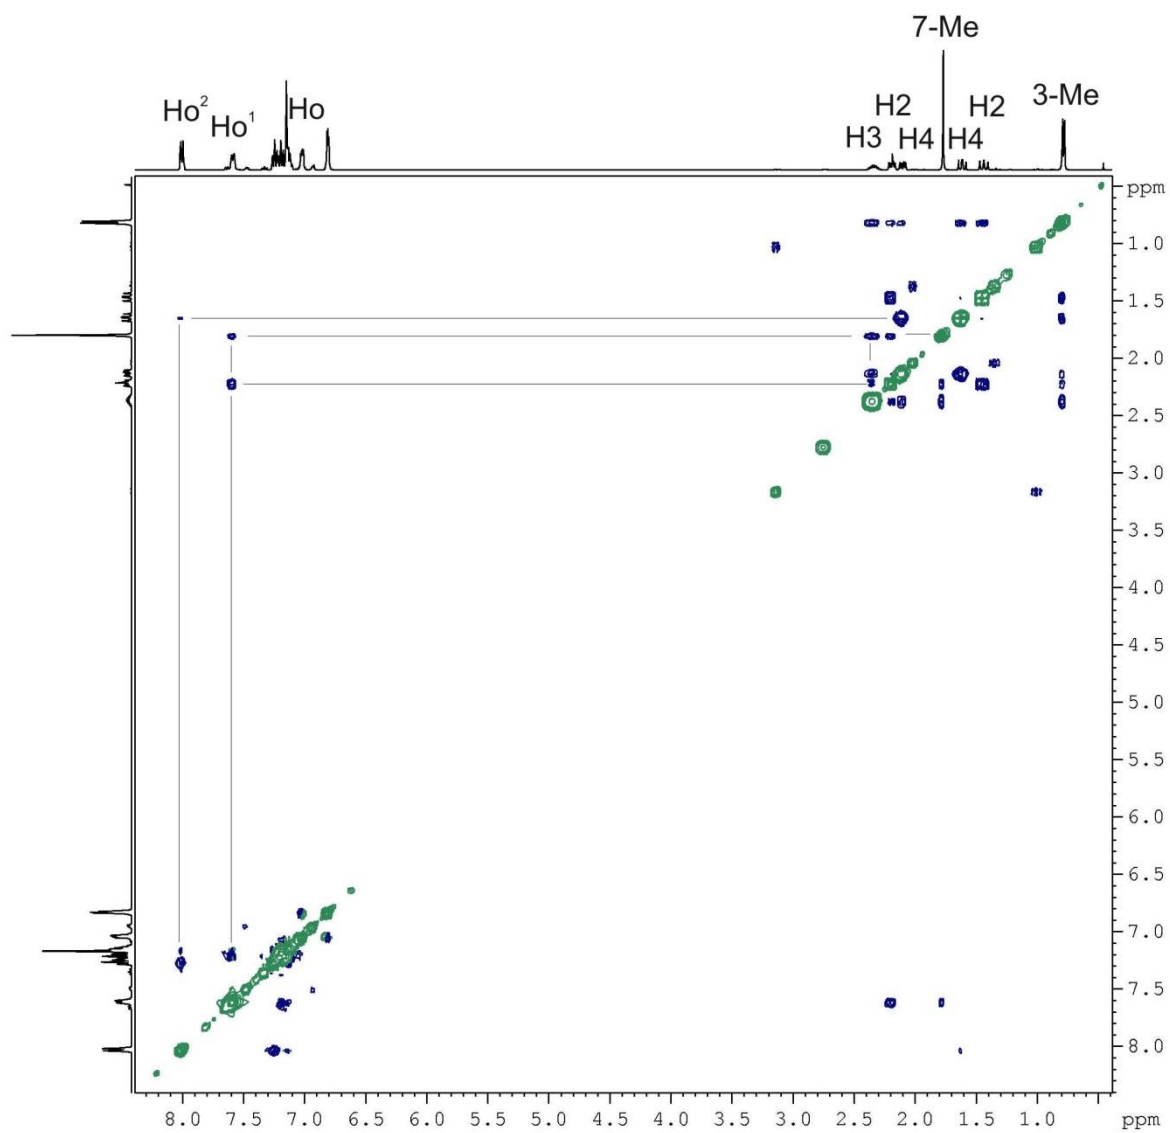

2D NOESY Spectrum of (1*S*\*,3*S*\*,5*R*\*,7*R*\*)-**5ab** (400.1 MHz, benzene-*d*<sub>6</sub>)

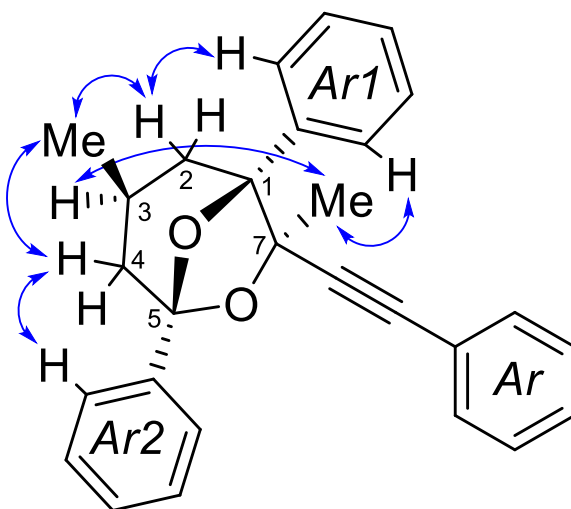

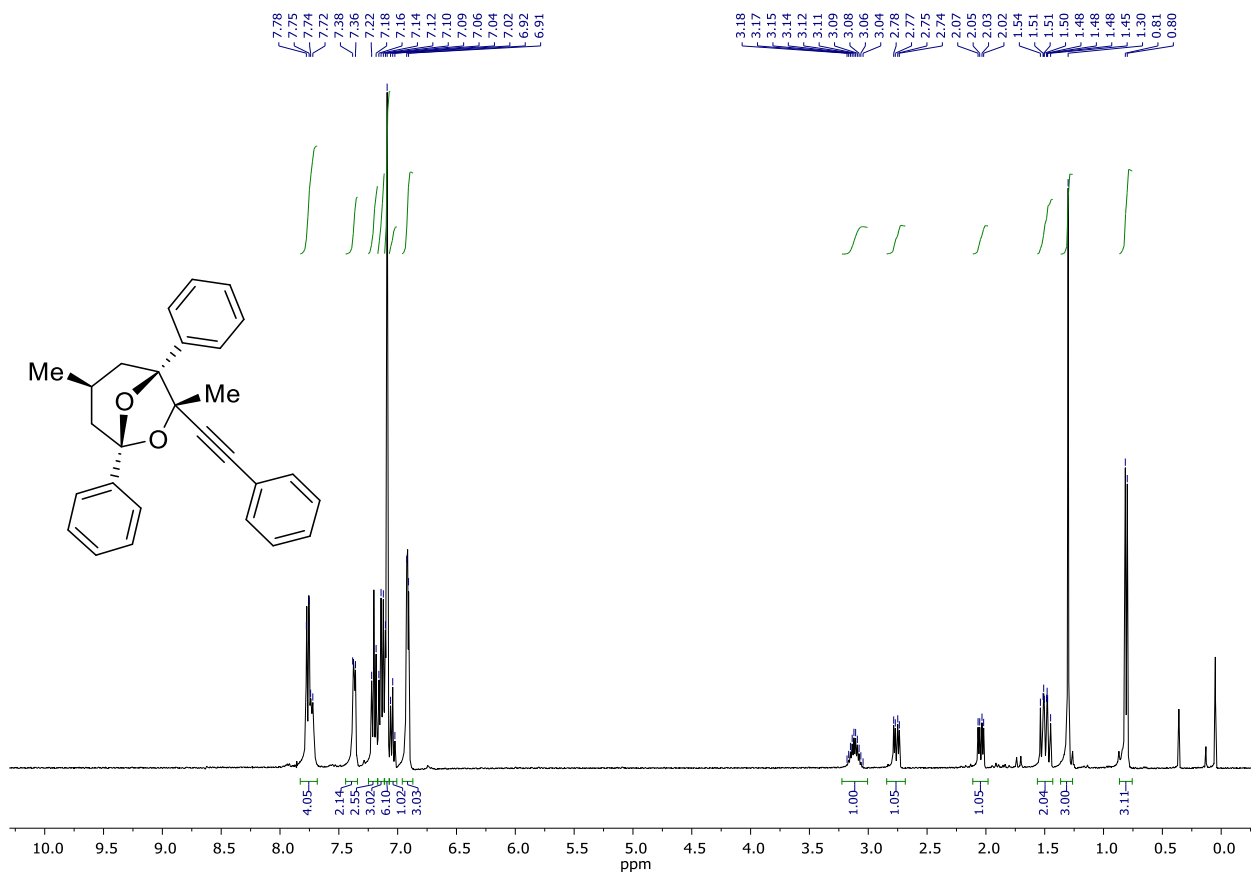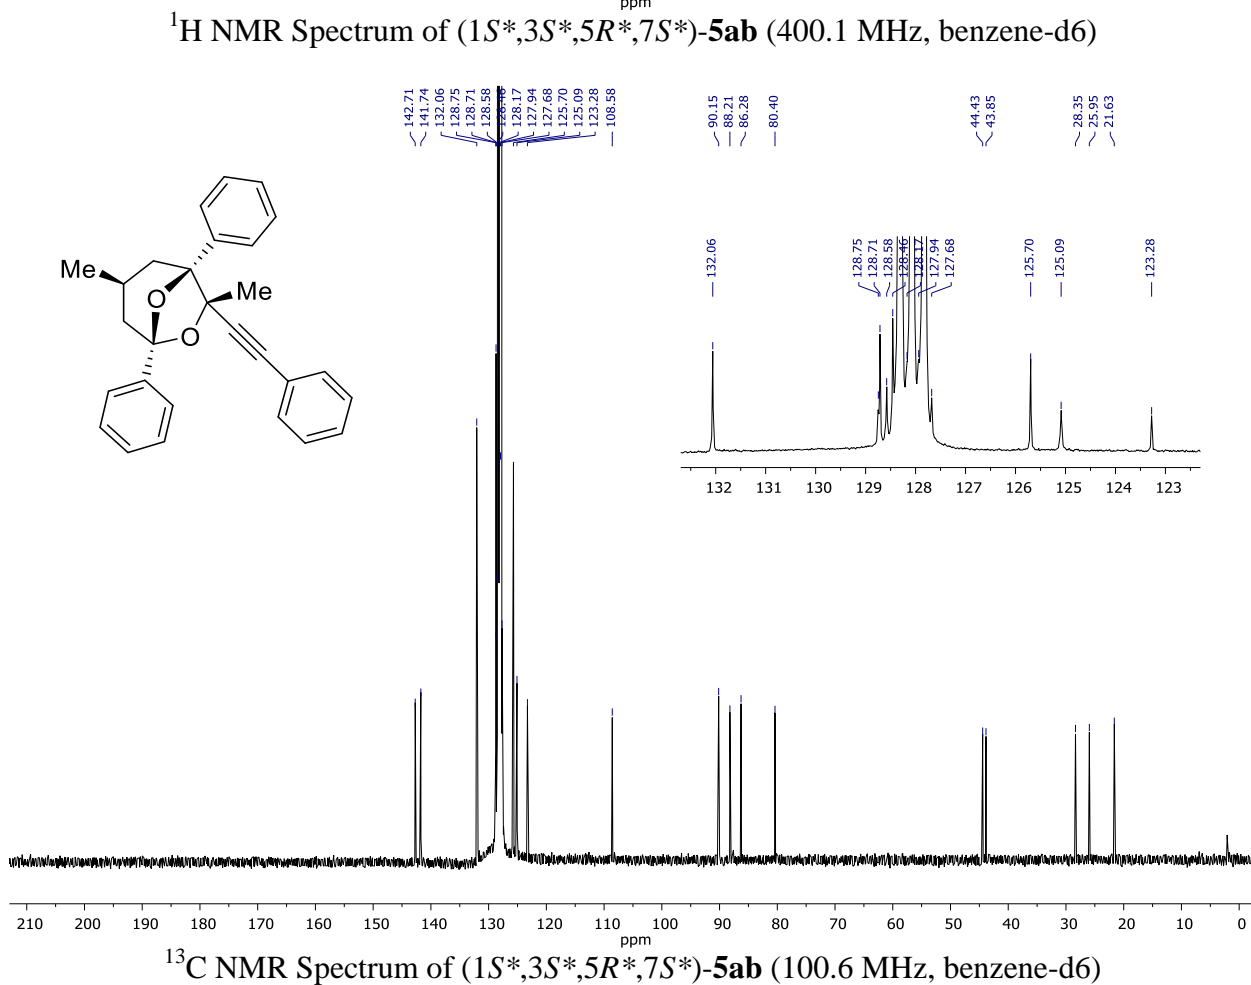

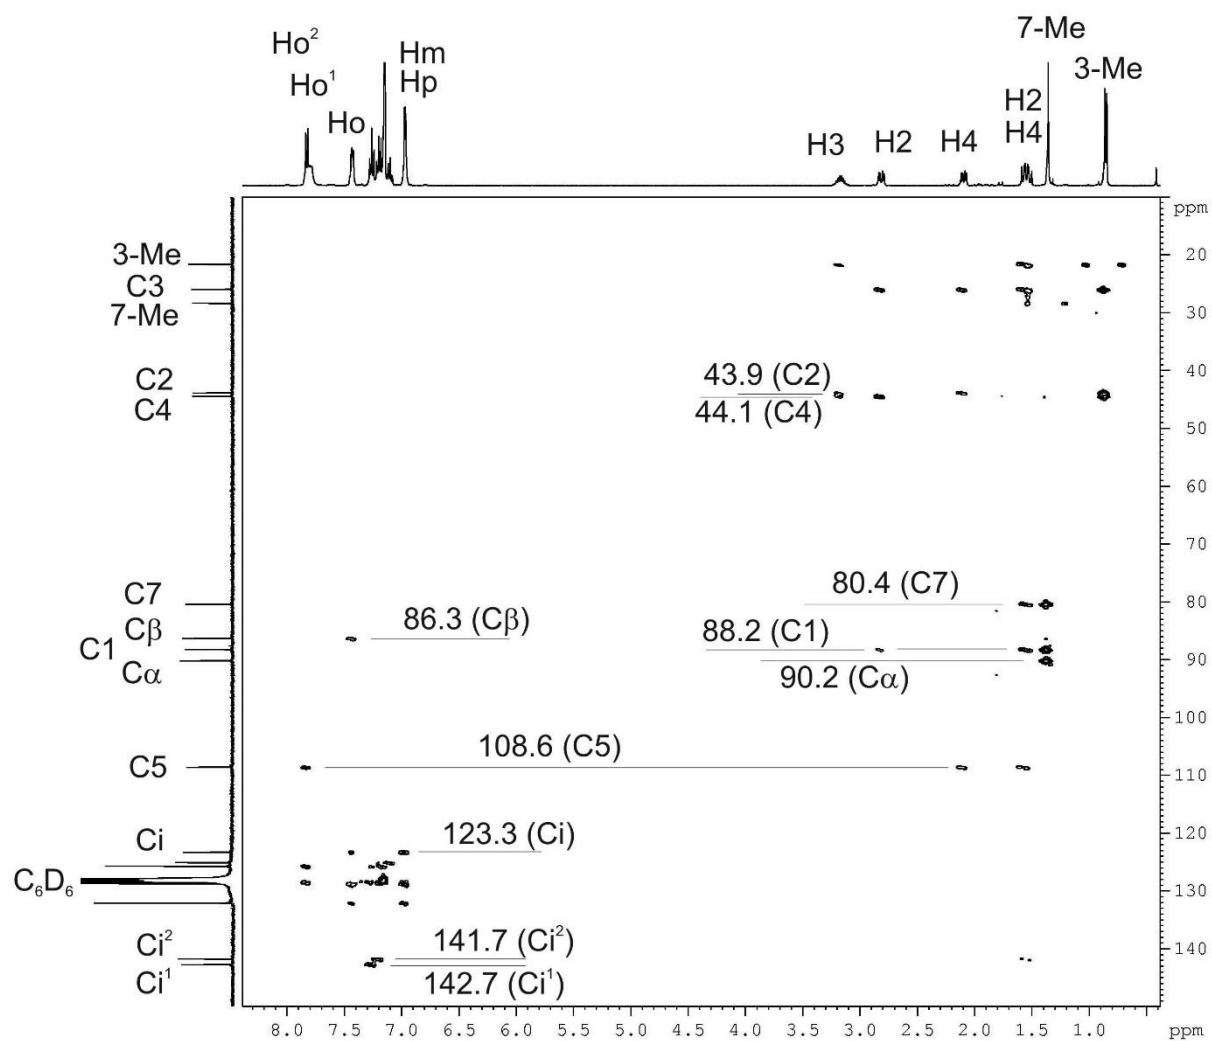

2D  $^1\text{H}$ - $^{13}\text{C}$  HMBC Spectrum of (1*S*\*,3*S*\*,5*R*\*,7*S*\*)-5ab.

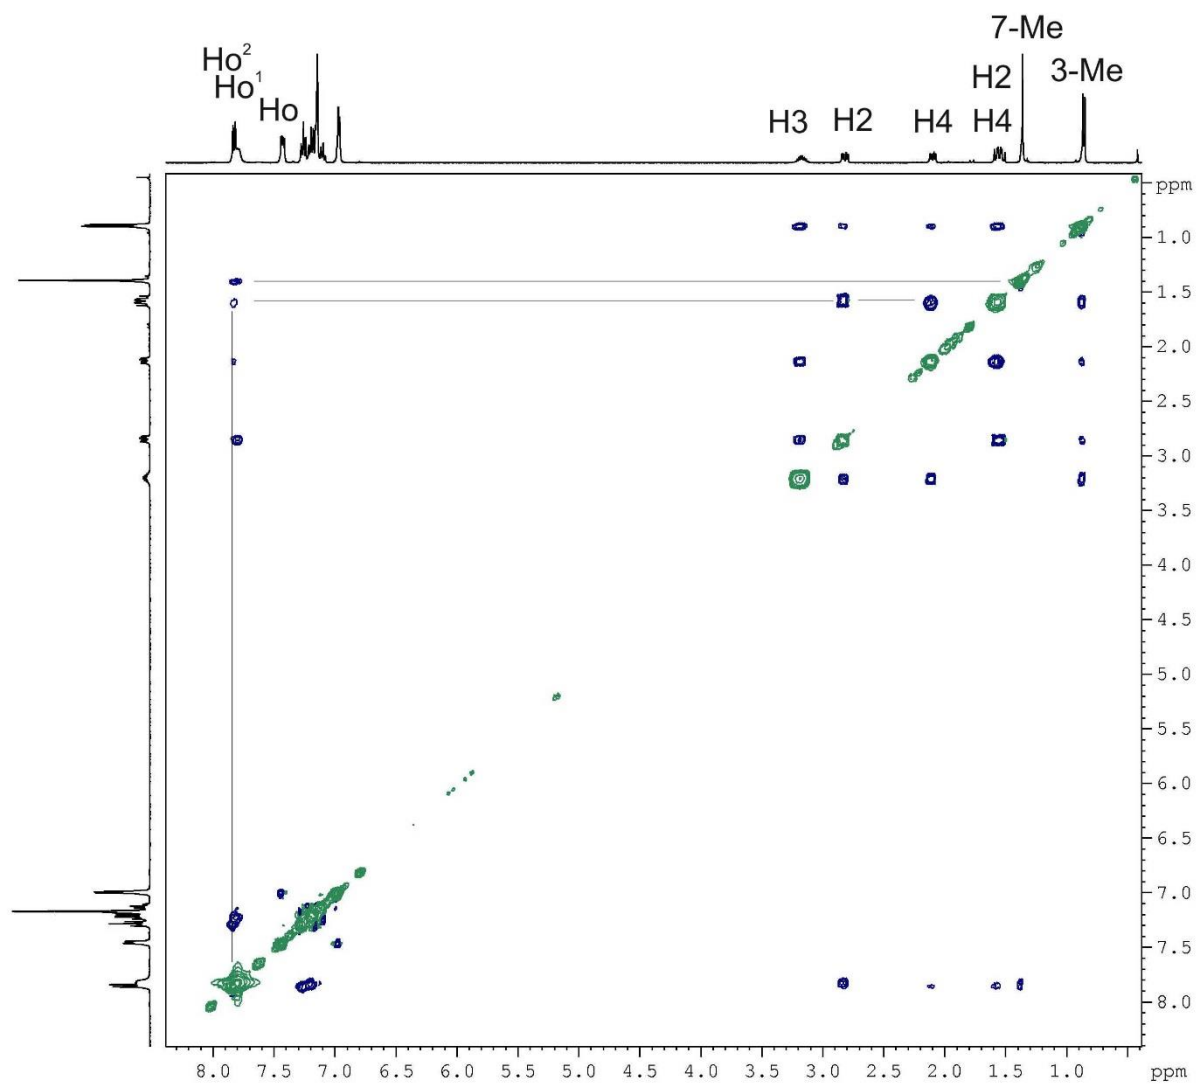

2D NOESY Spectrum of (1*S*\*,3*S*\*,5*R*\*,7*S*\*)-**5ab** (400.1 MHz, benzene-d<sub>6</sub>)

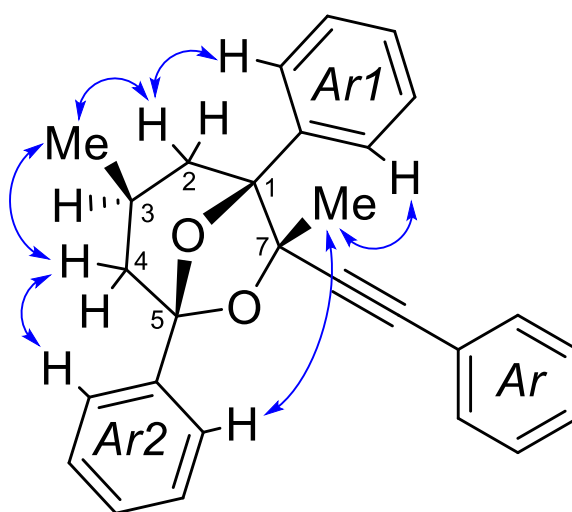



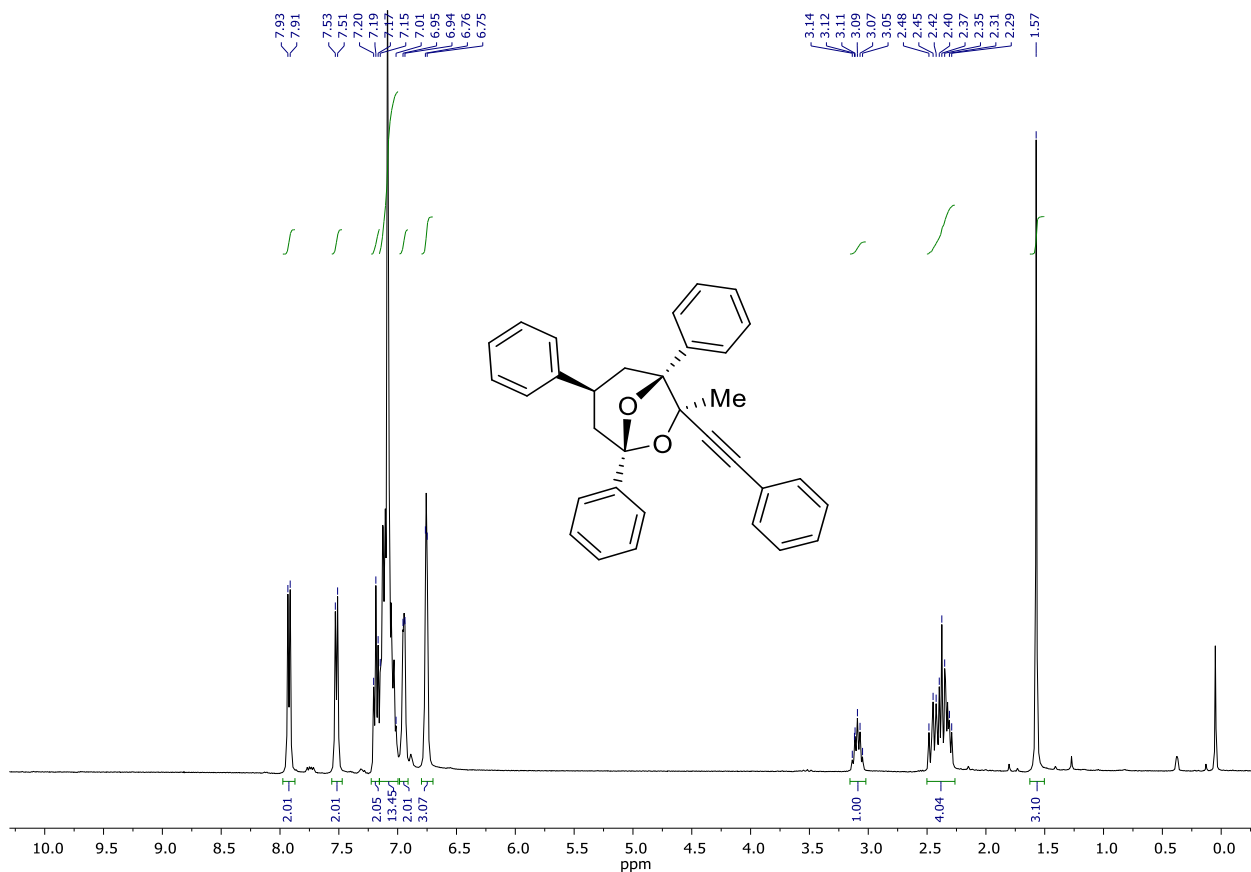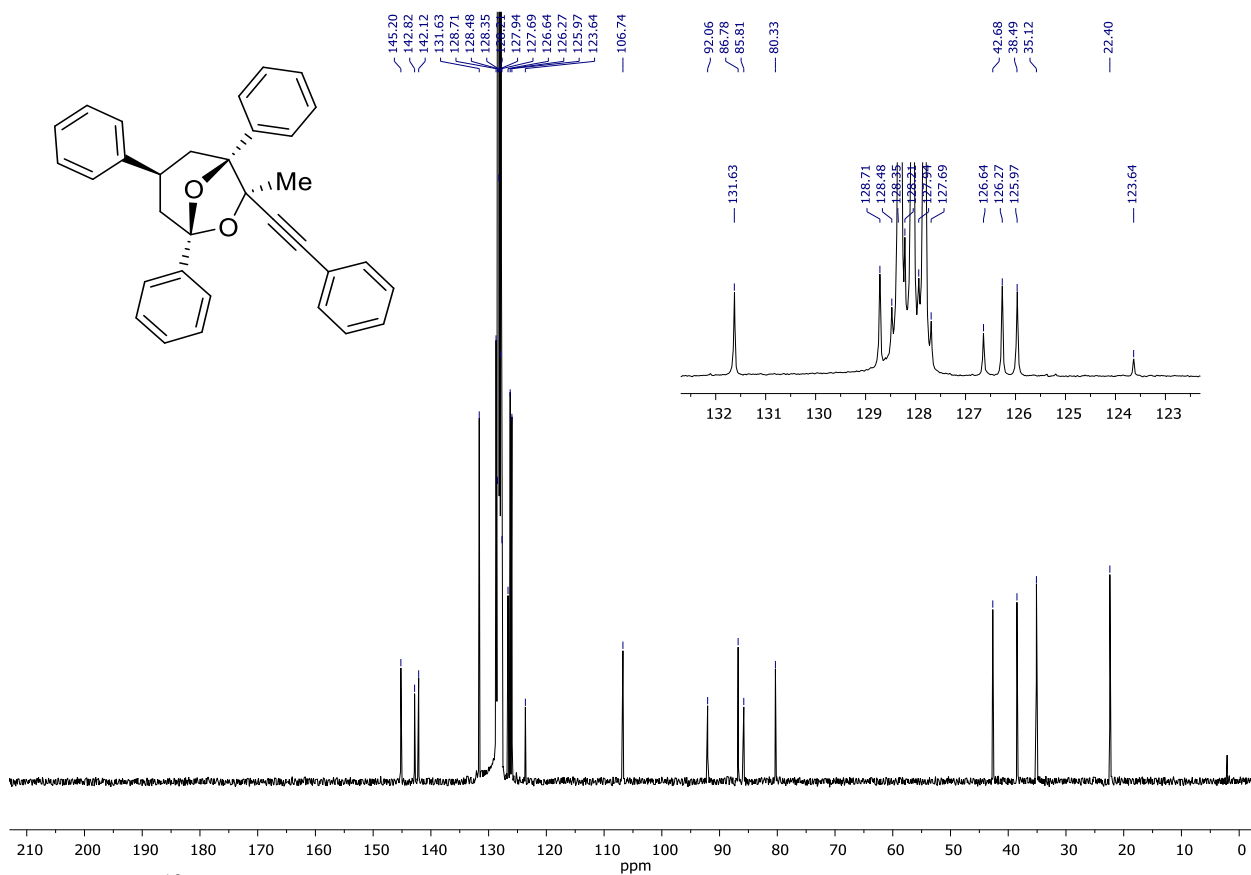

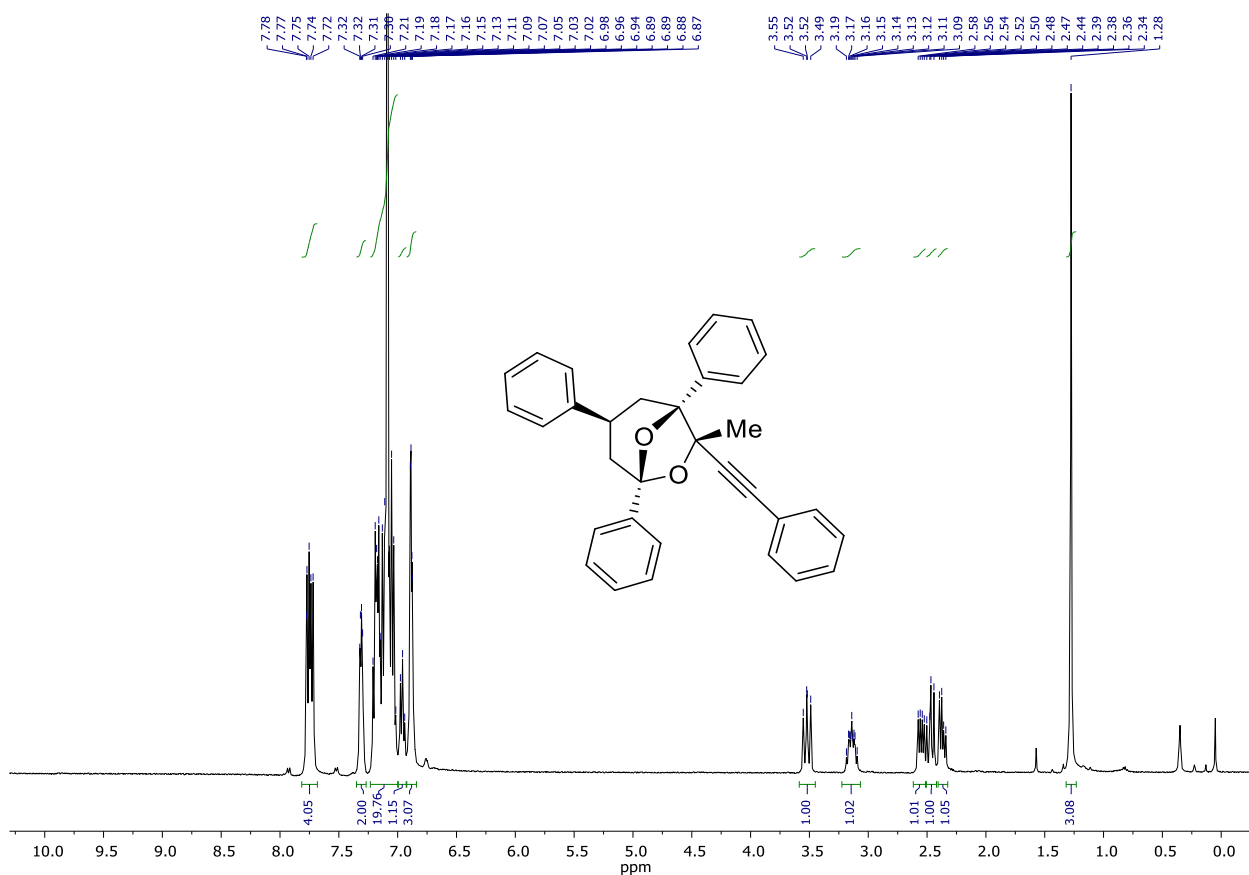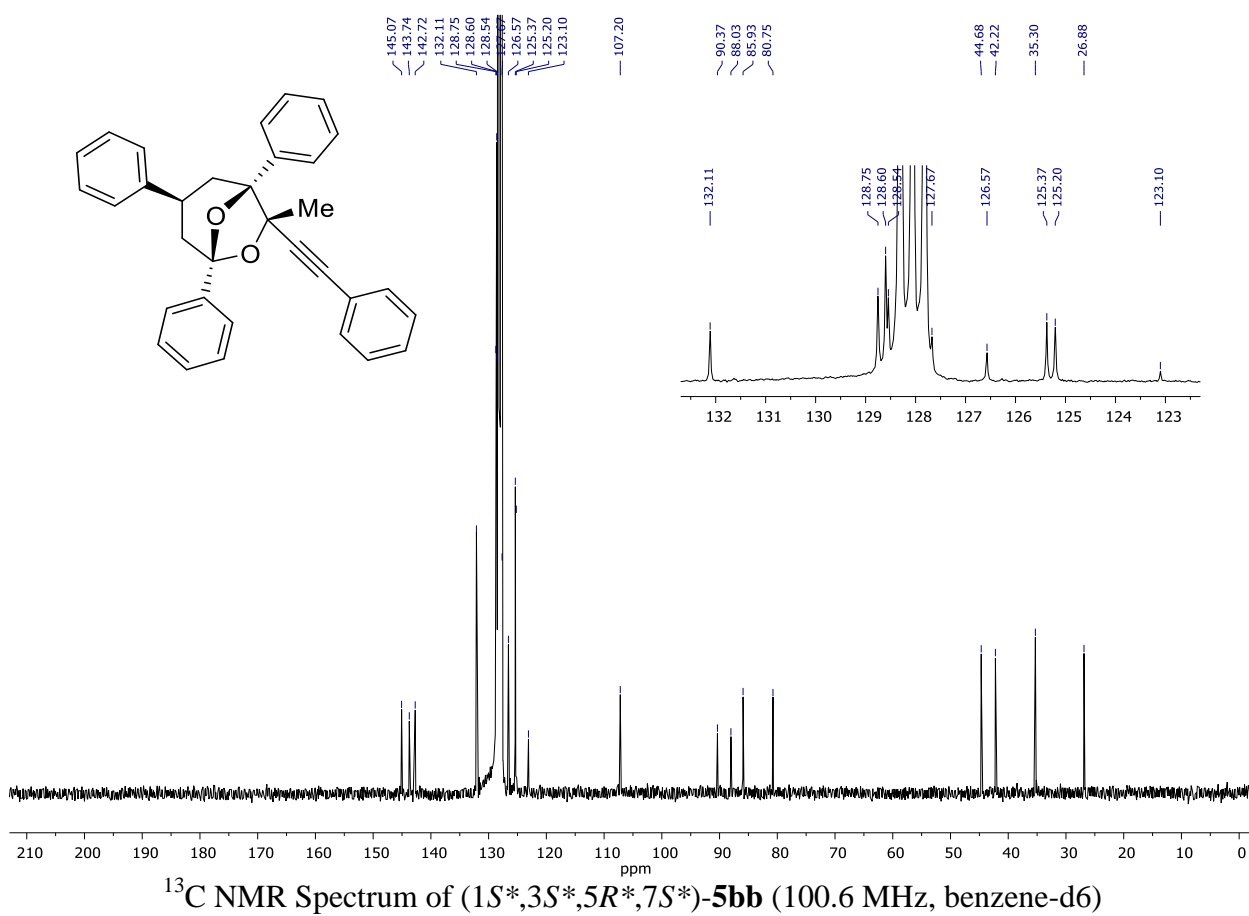

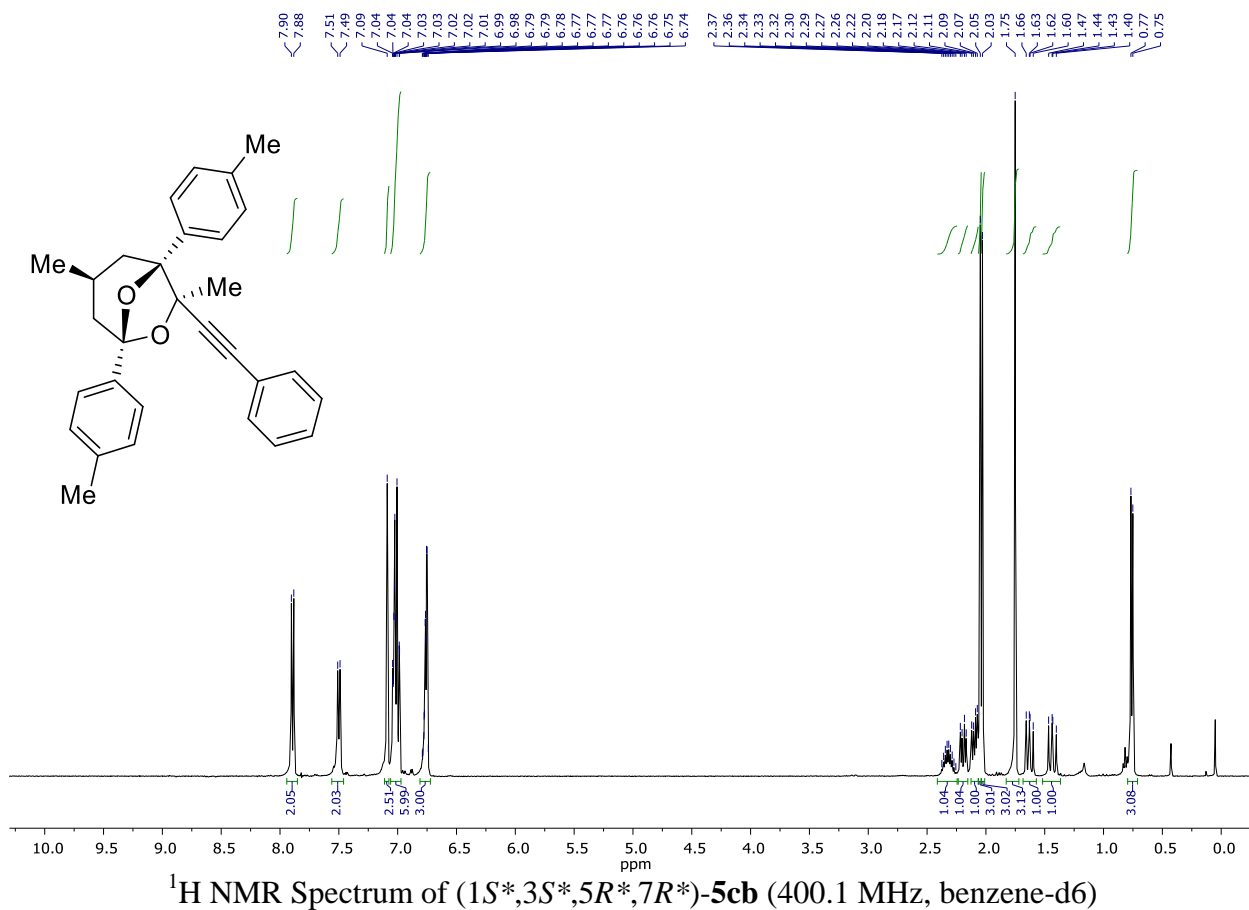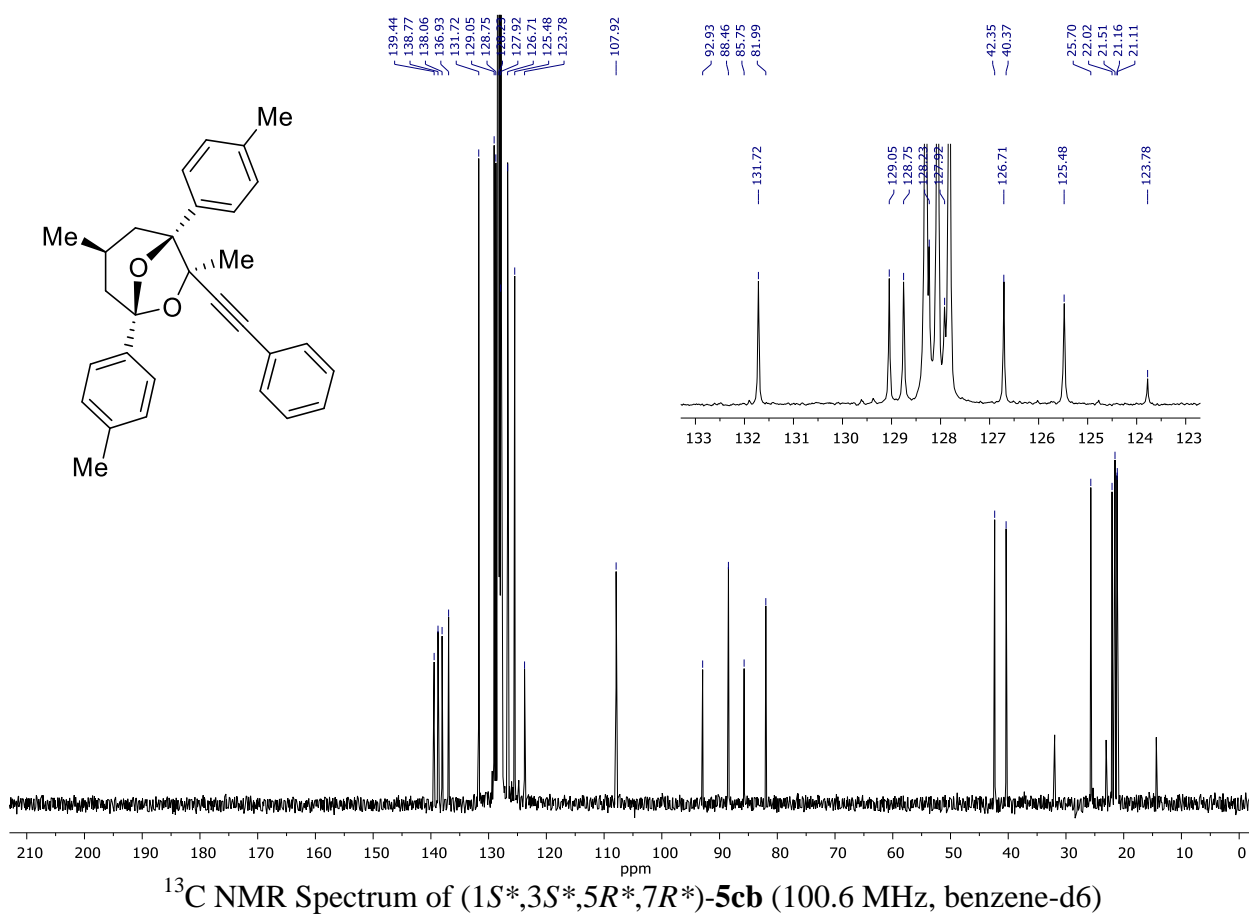

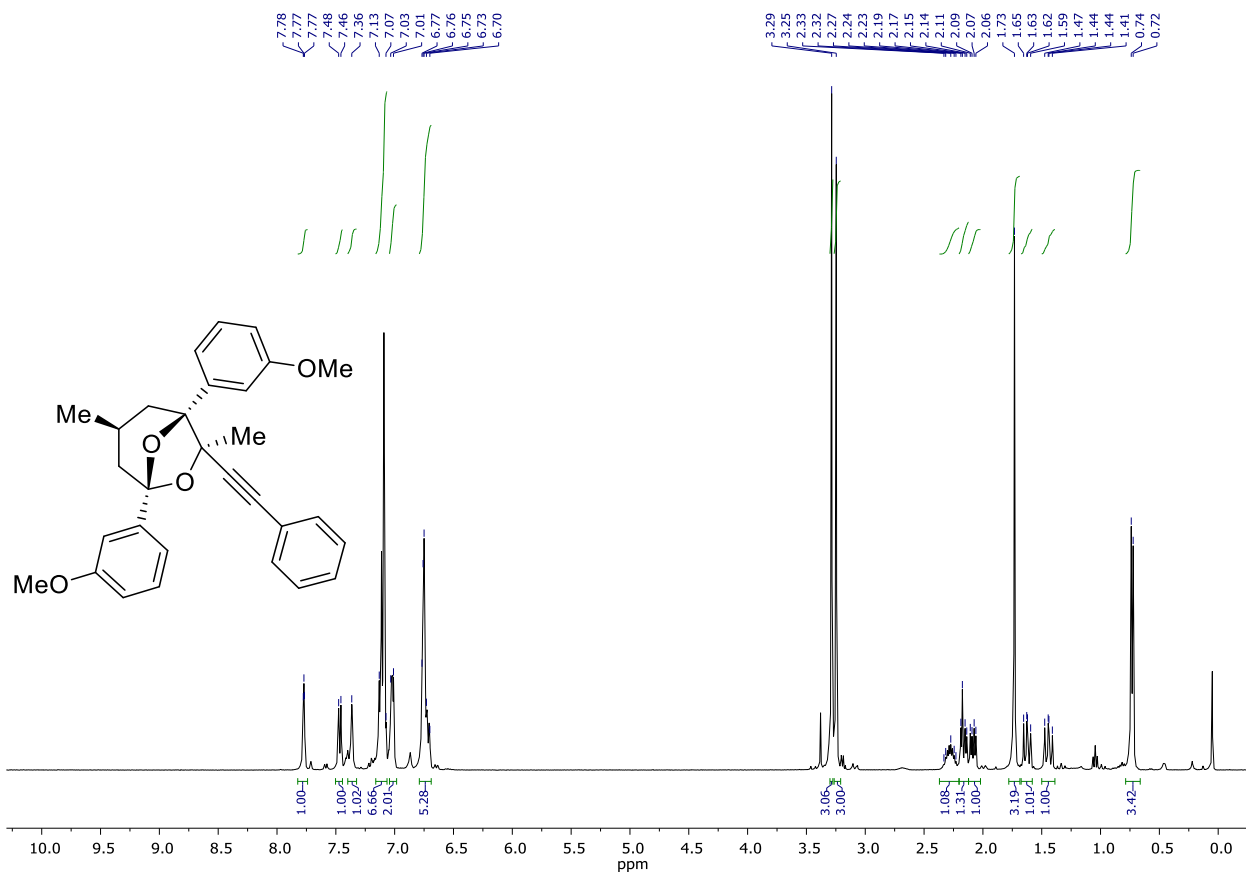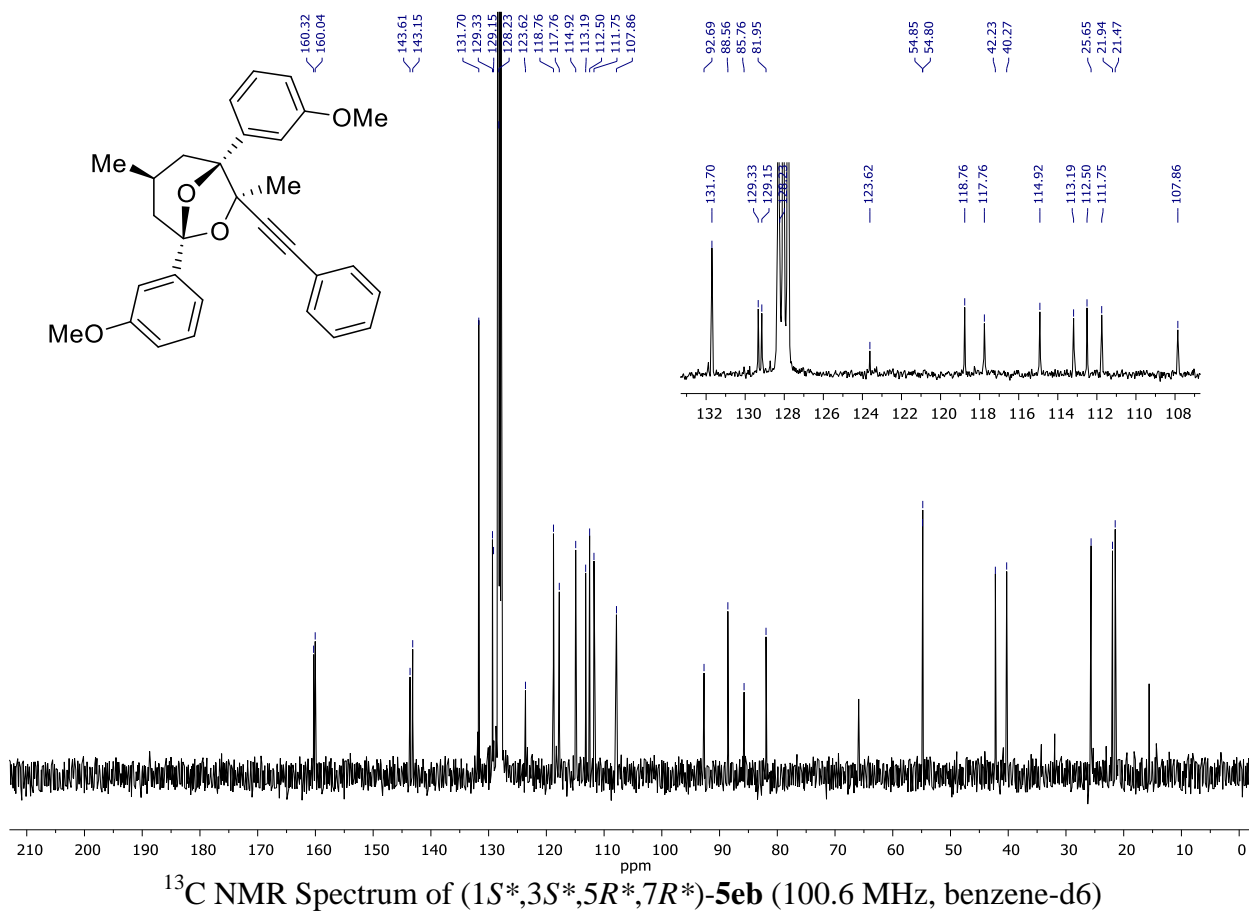

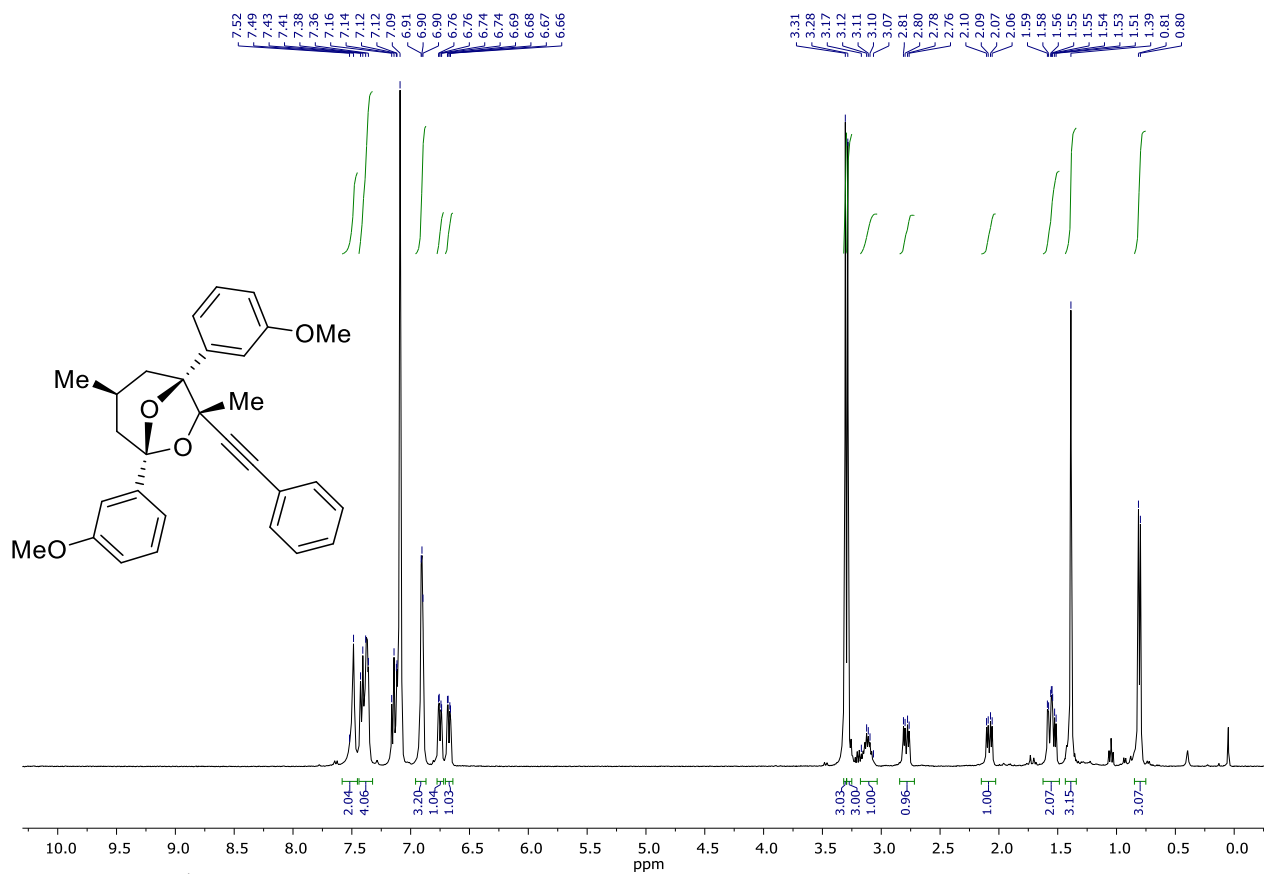

**<sup>1</sup>H NMR Spectrum of (1*S*\*,3*S*\*,5*R*\*,7*S*\*)-5eb (400.1 MHz, benzene-d<sub>6</sub>)**

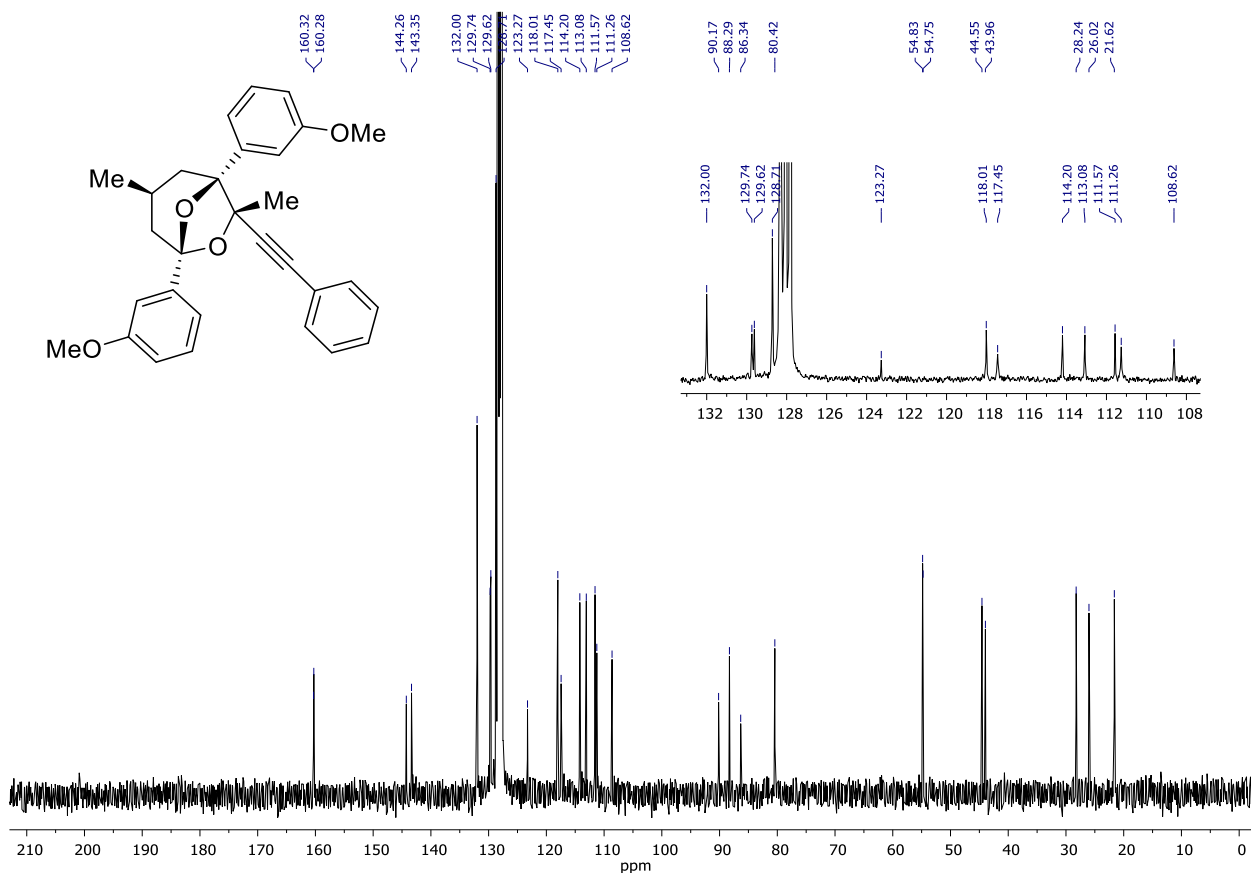

**<sup>13</sup>C NMR Spectrum of (1*S*\*,3*S*\*,5*R*\*,7*S*\*)-5eb (100.6 MHz, benzene-d<sub>6</sub>)**

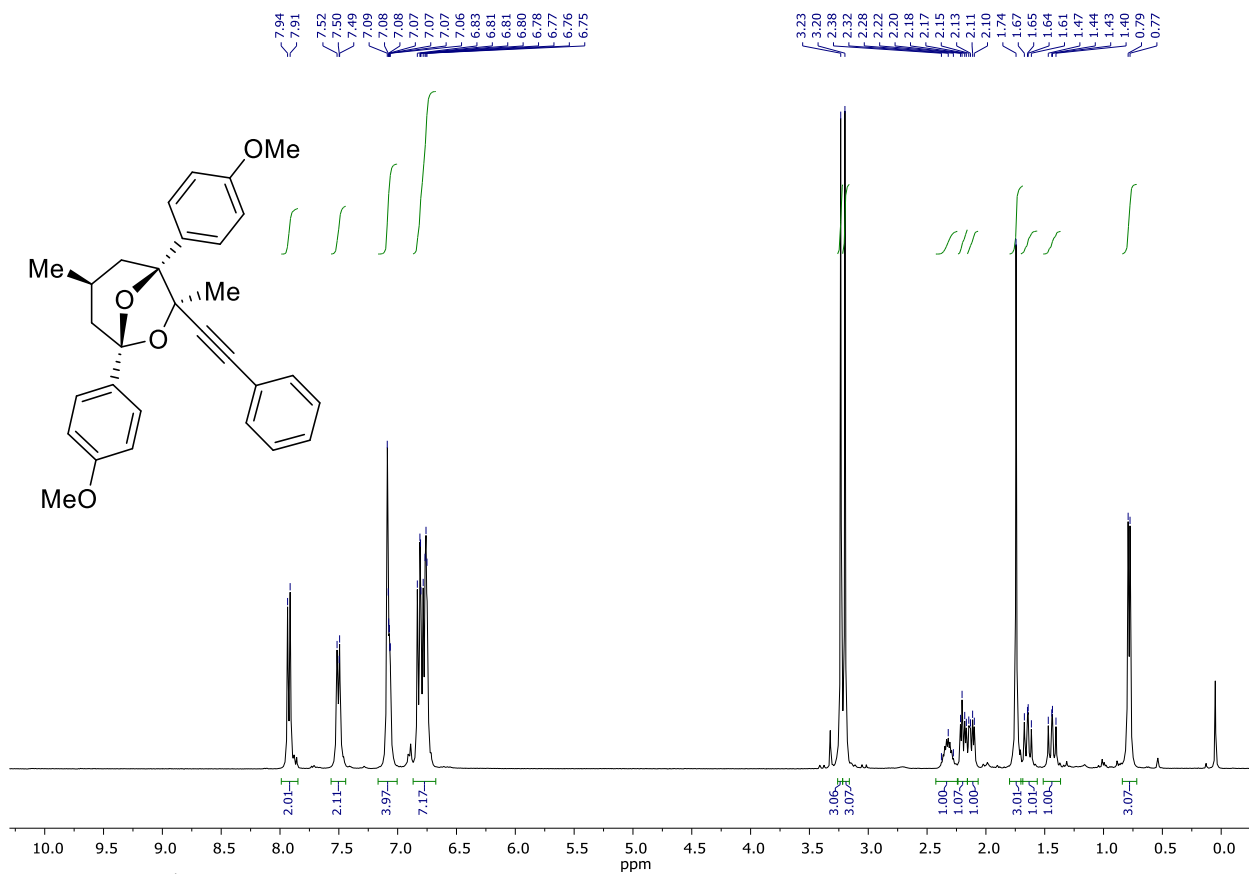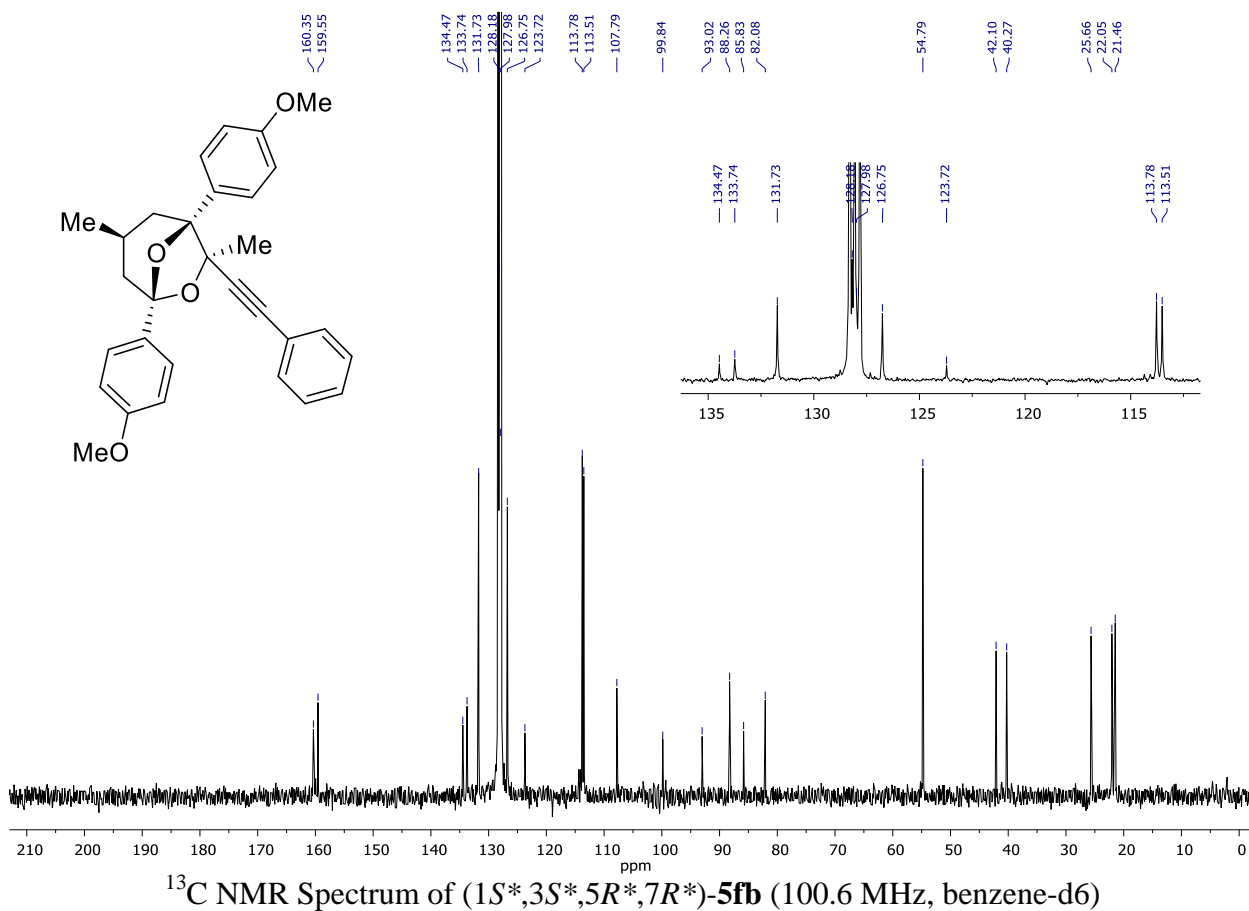

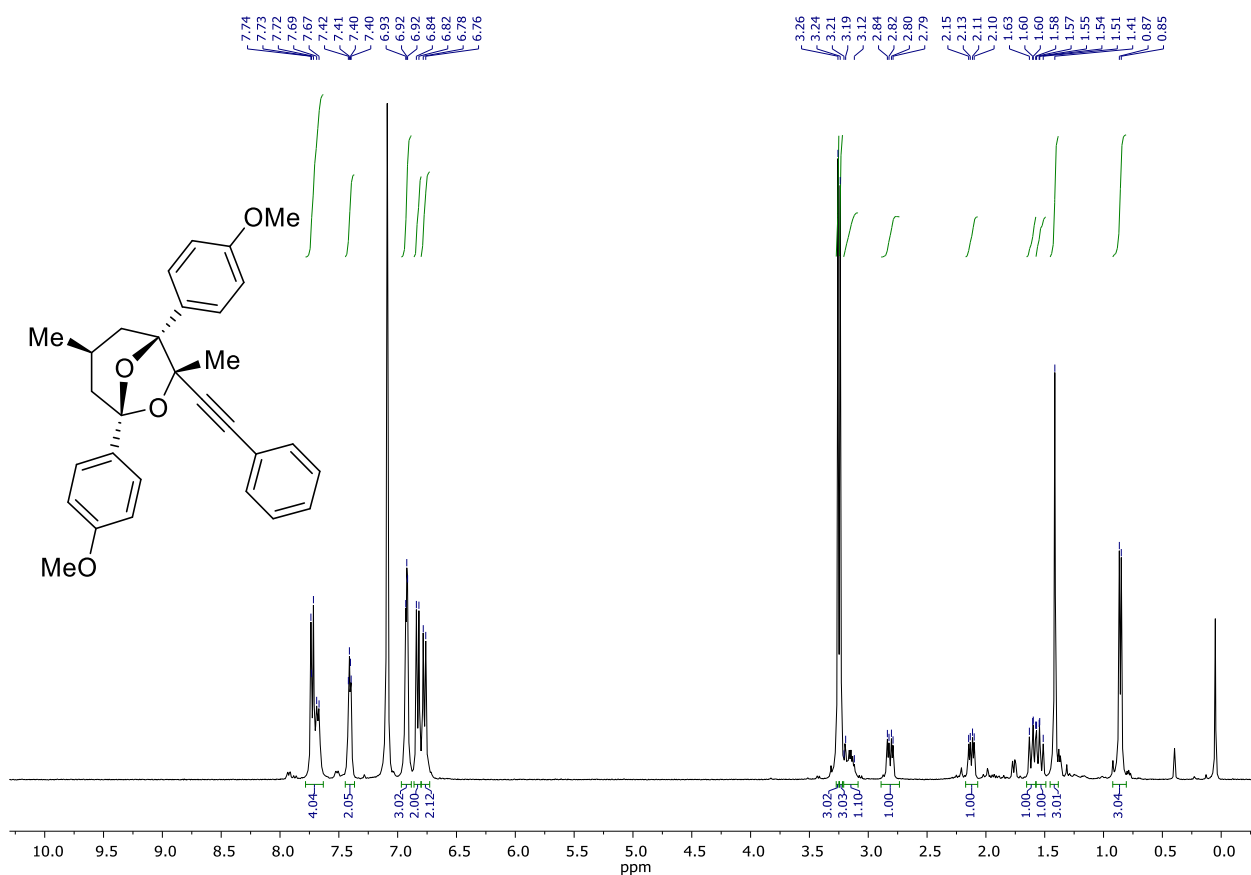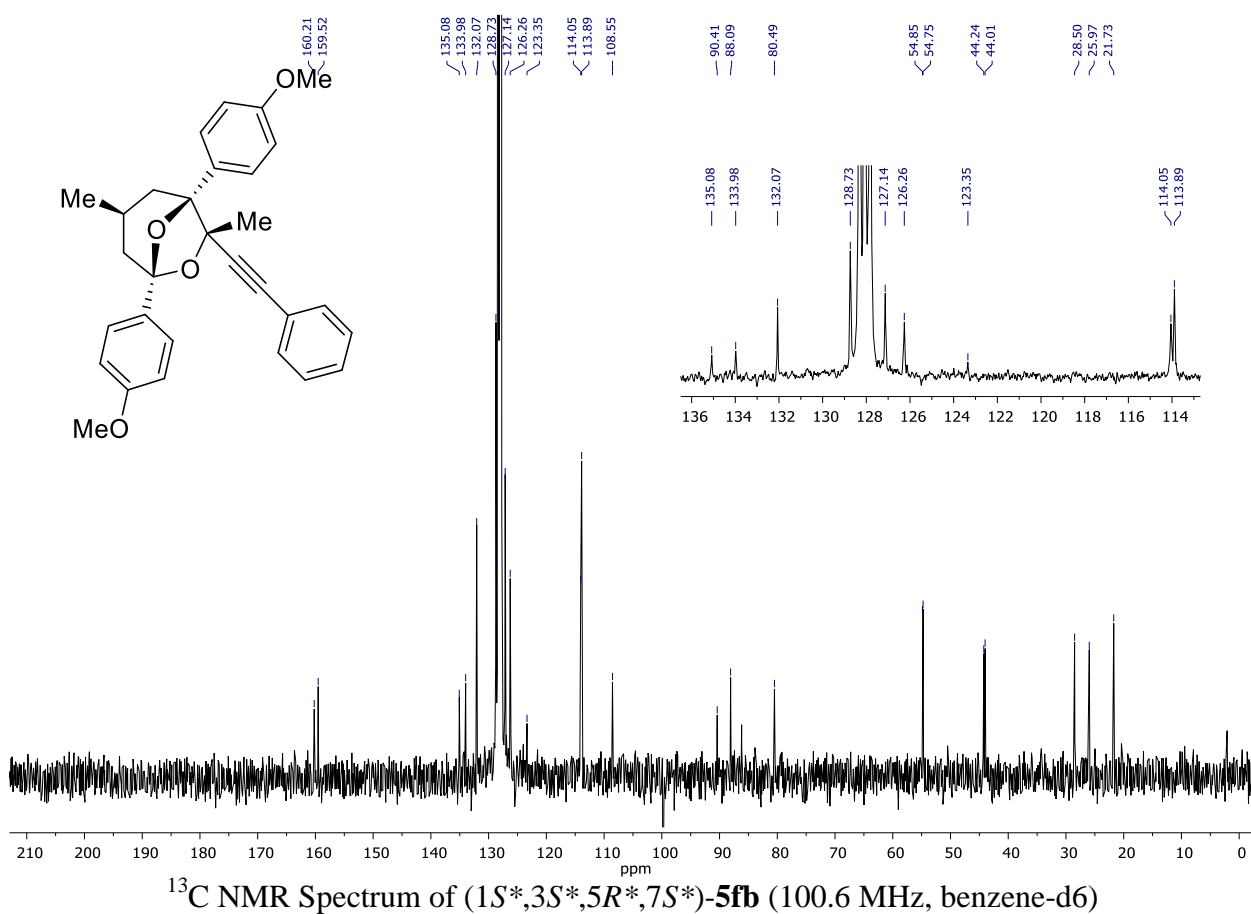

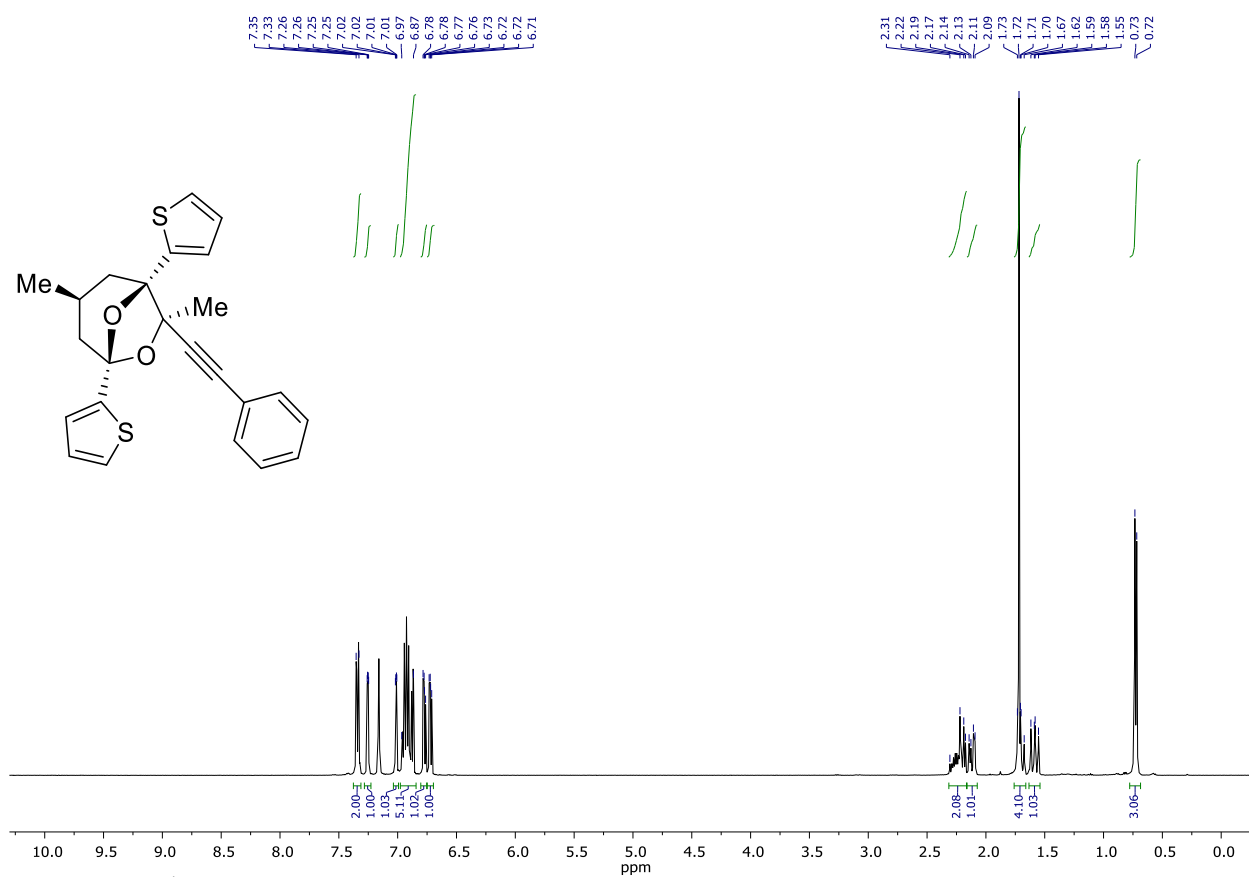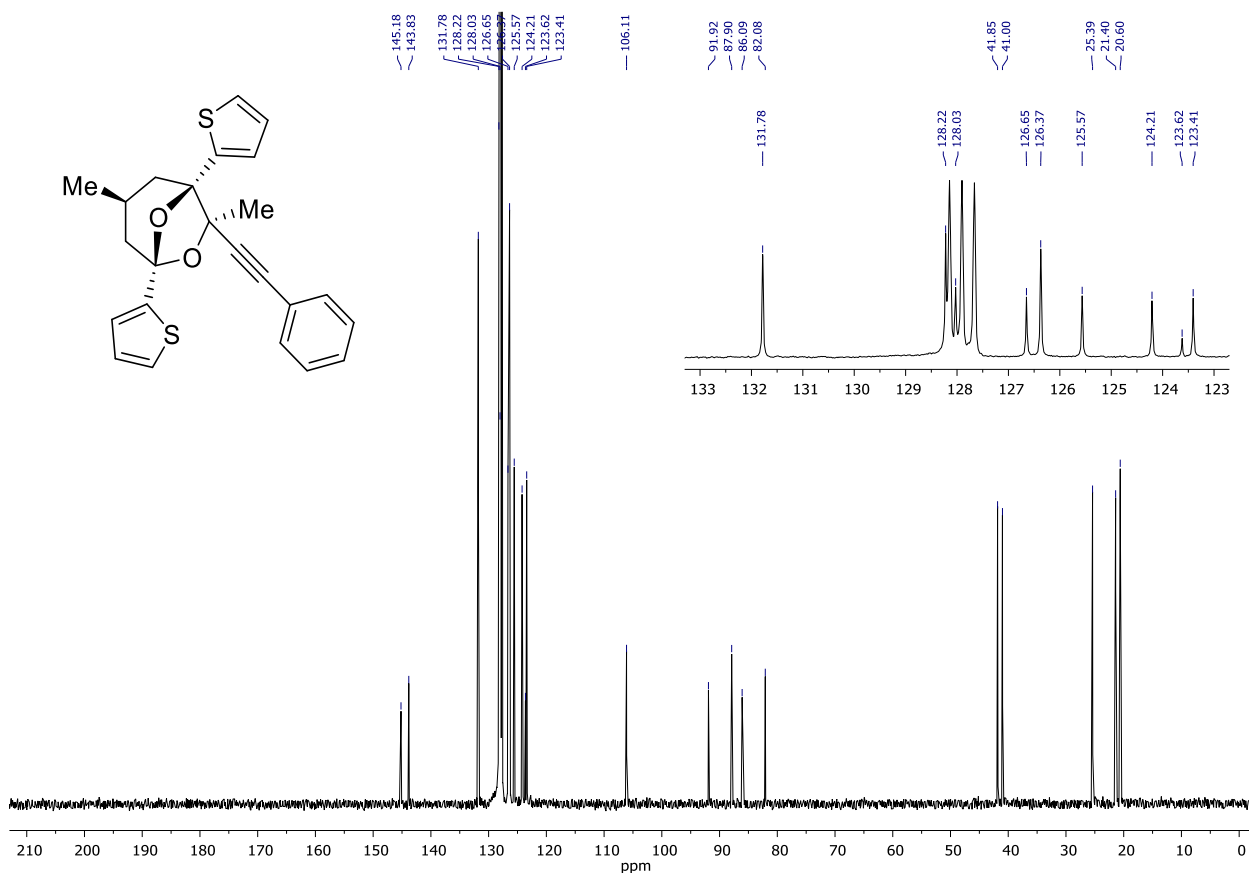



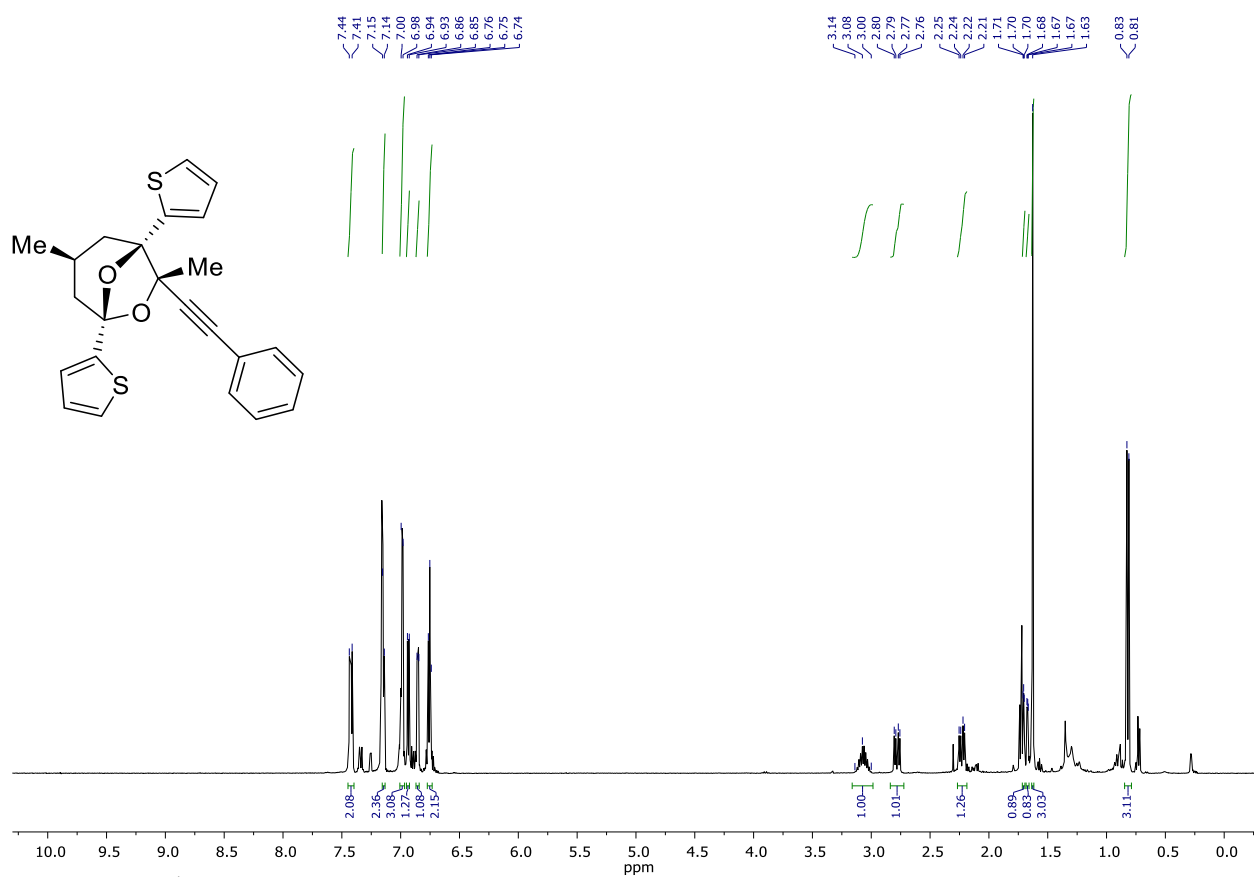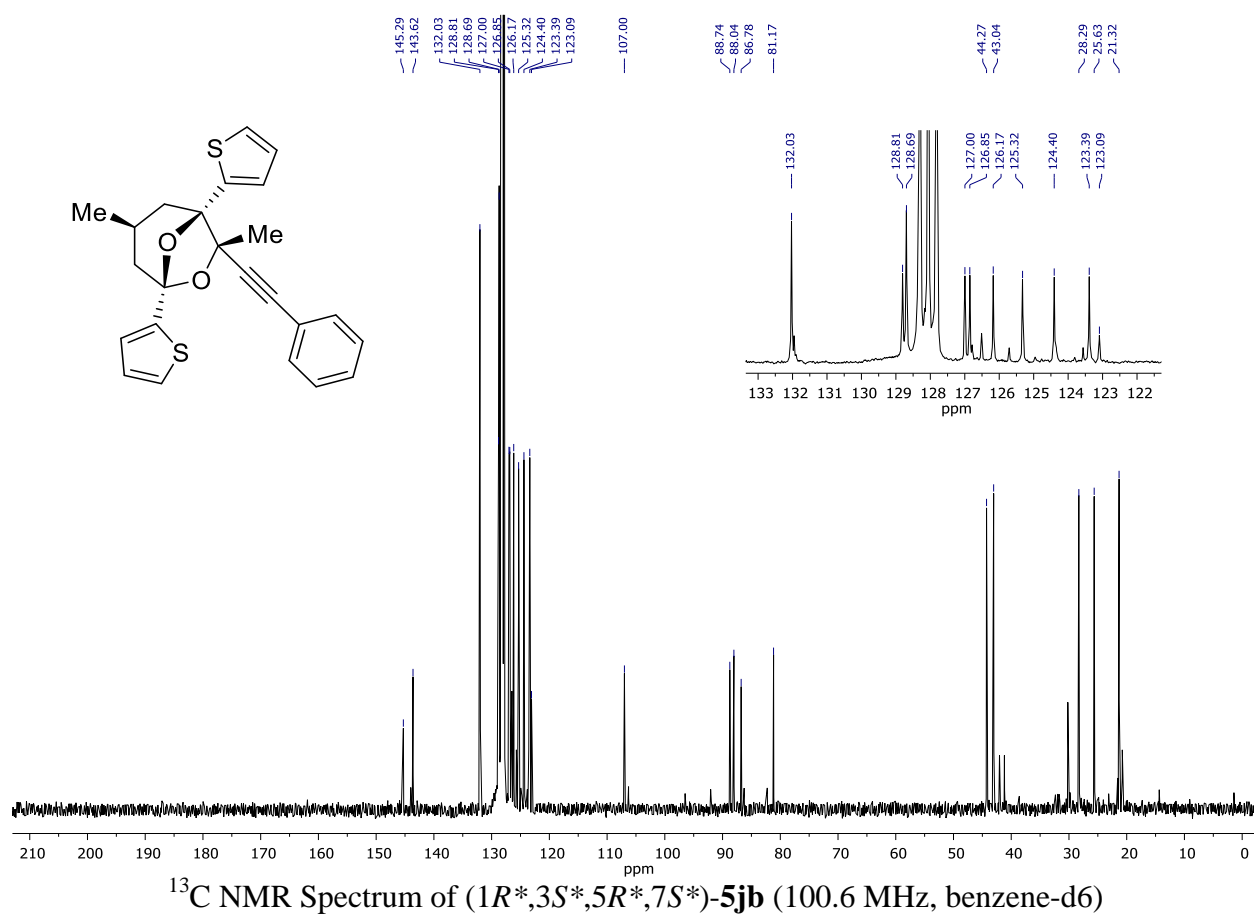

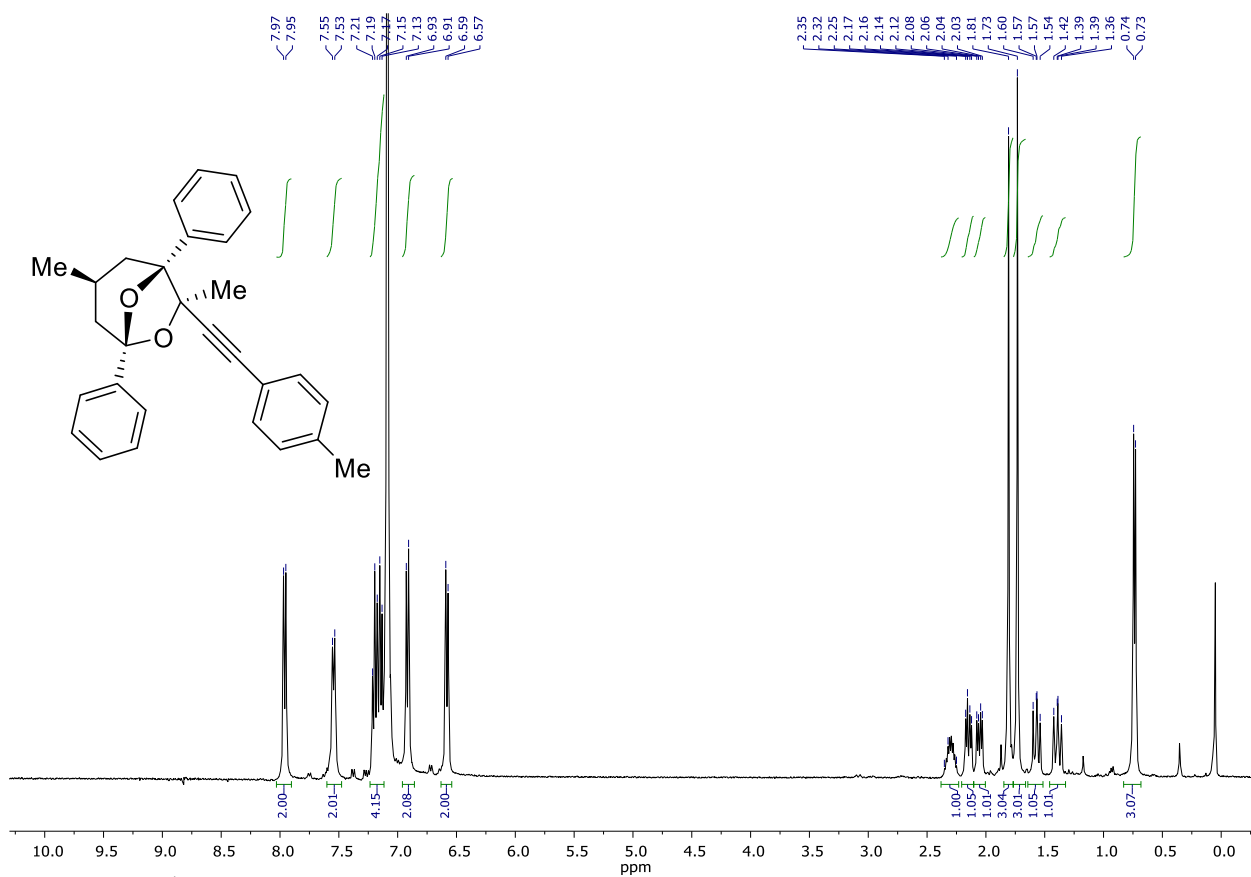

**<sup>1</sup>H NMR Spectrum of (1*S*\*,3*S*\*,5*R*\*,7*R*\*)-5ac (400.1 MHz, benzene-d<sub>6</sub>)**

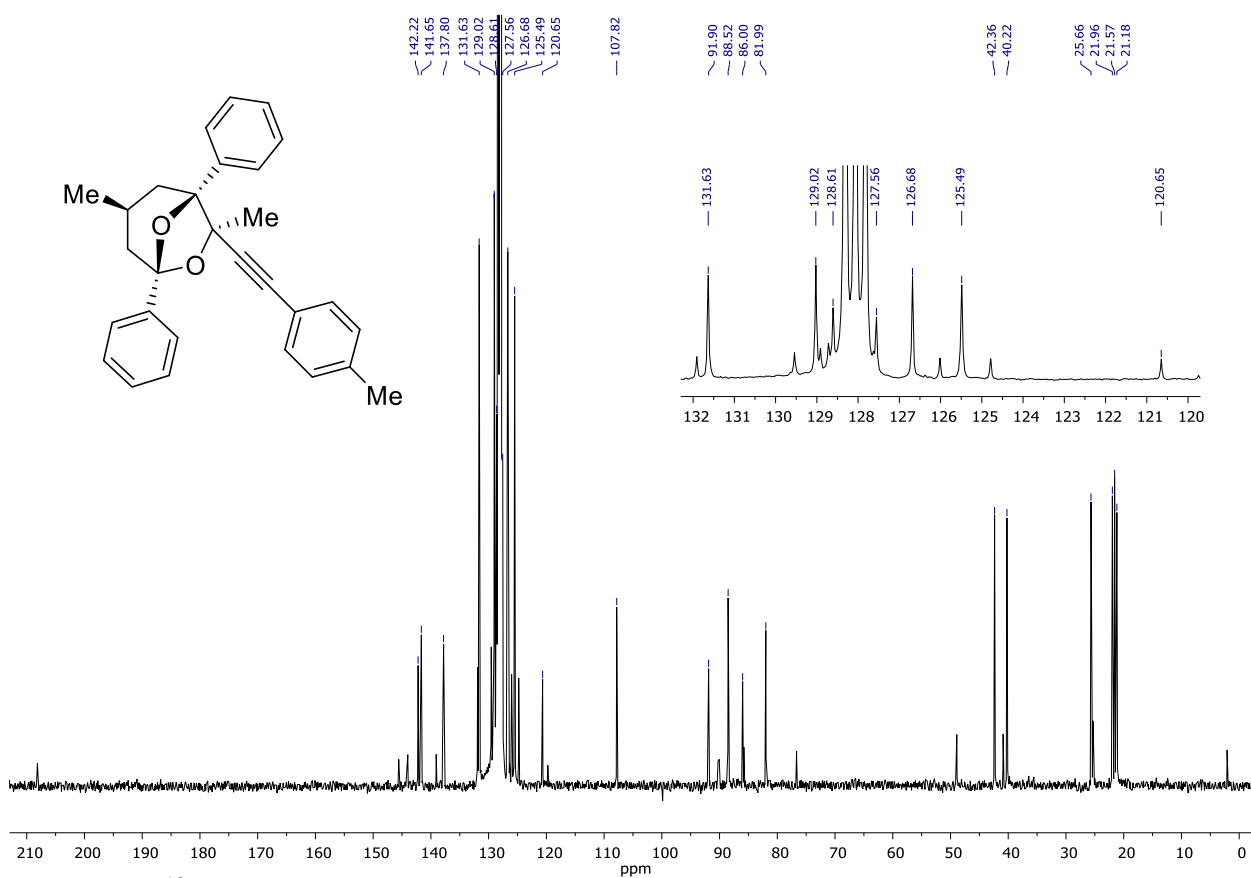

**<sup>13</sup>C NMR Spectrum of (1*S*\*,3*S*\*,5*R*\*,7*R*\*)-5ac (100.6 MHz, benzene-d<sub>6</sub>)**

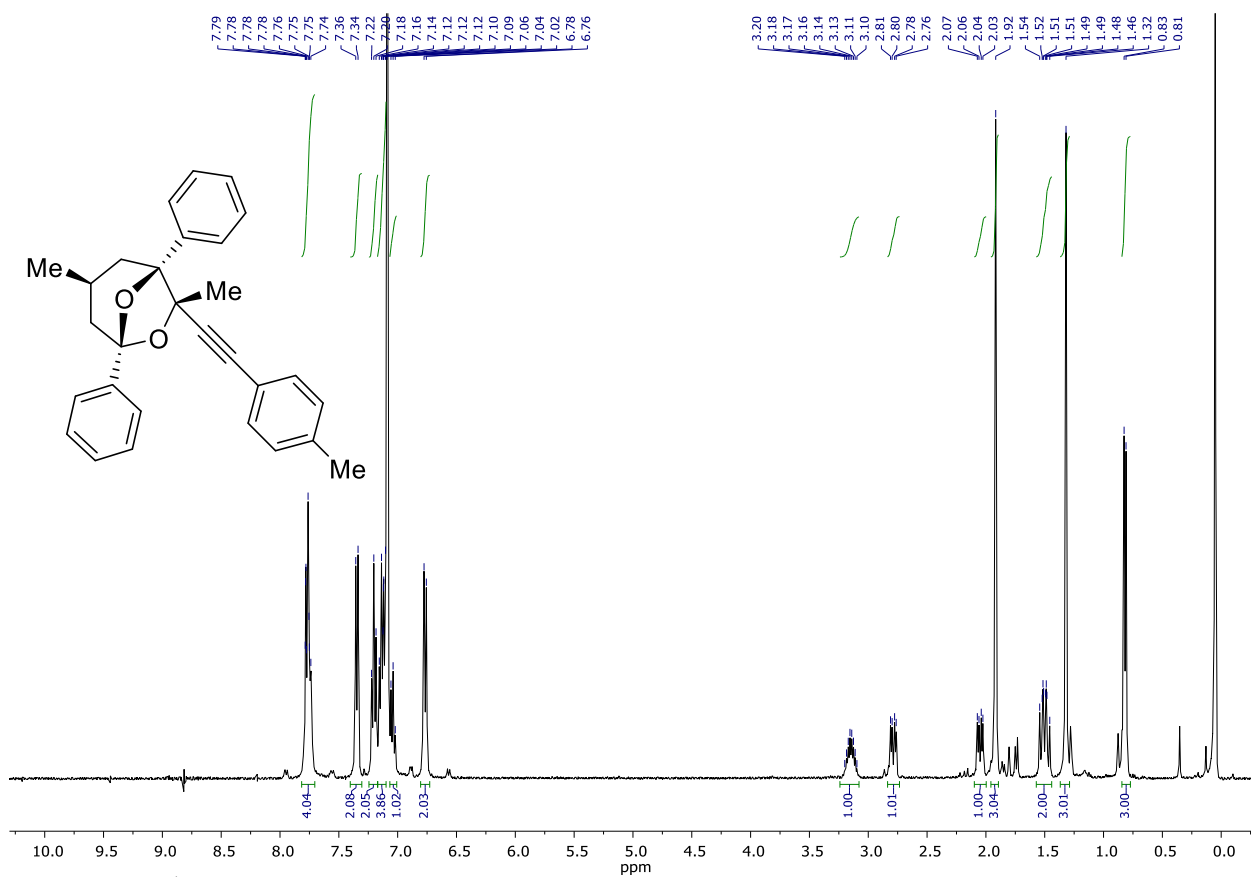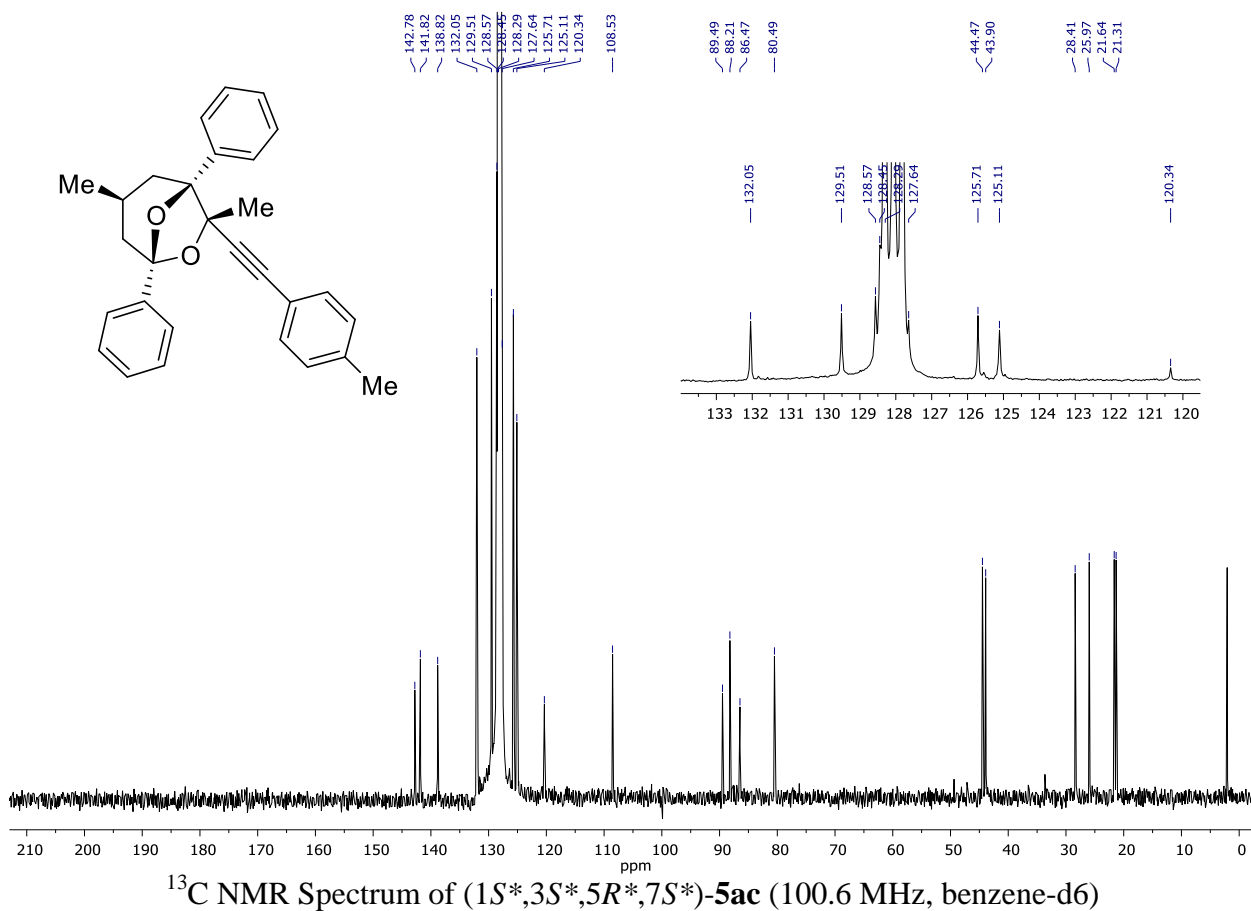

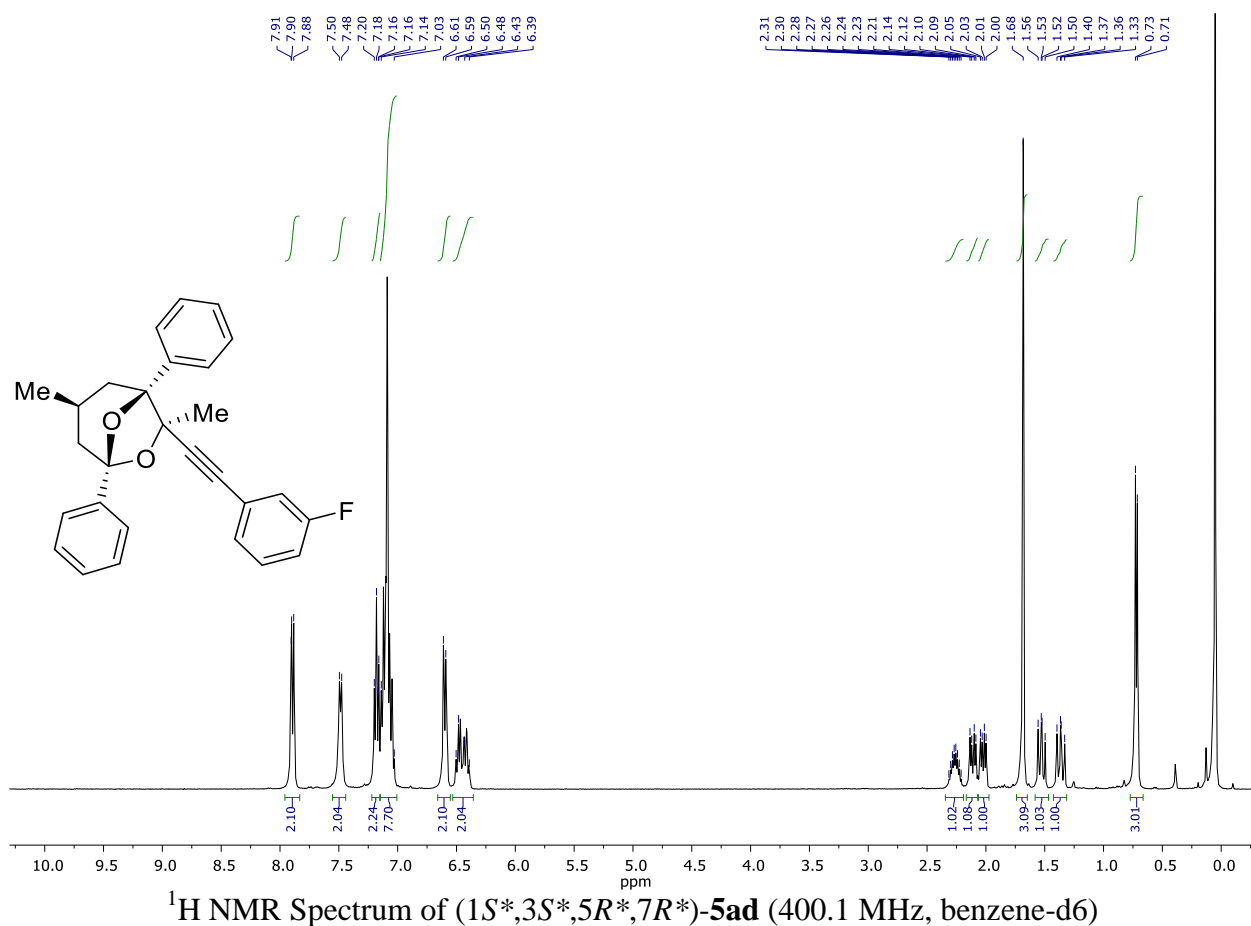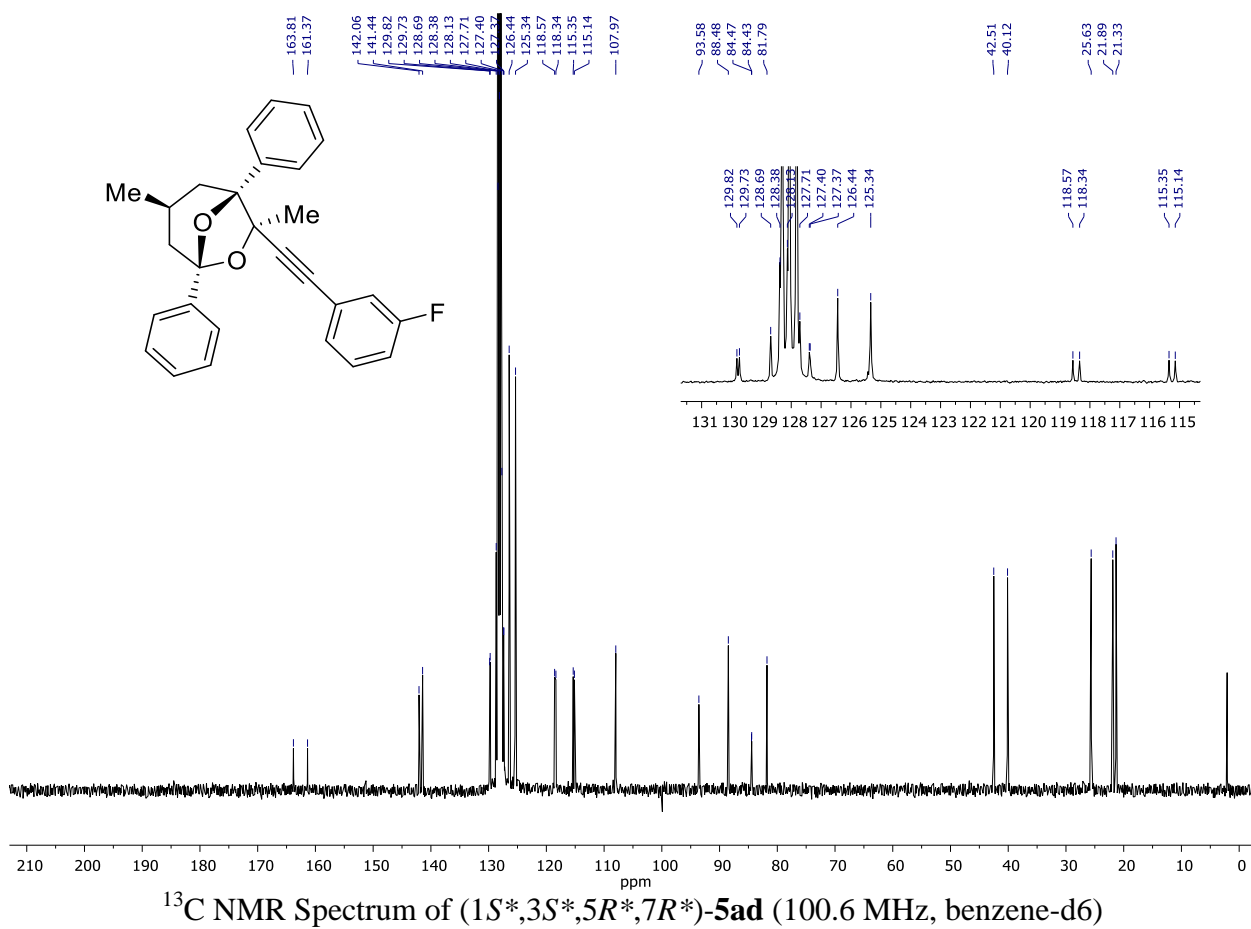

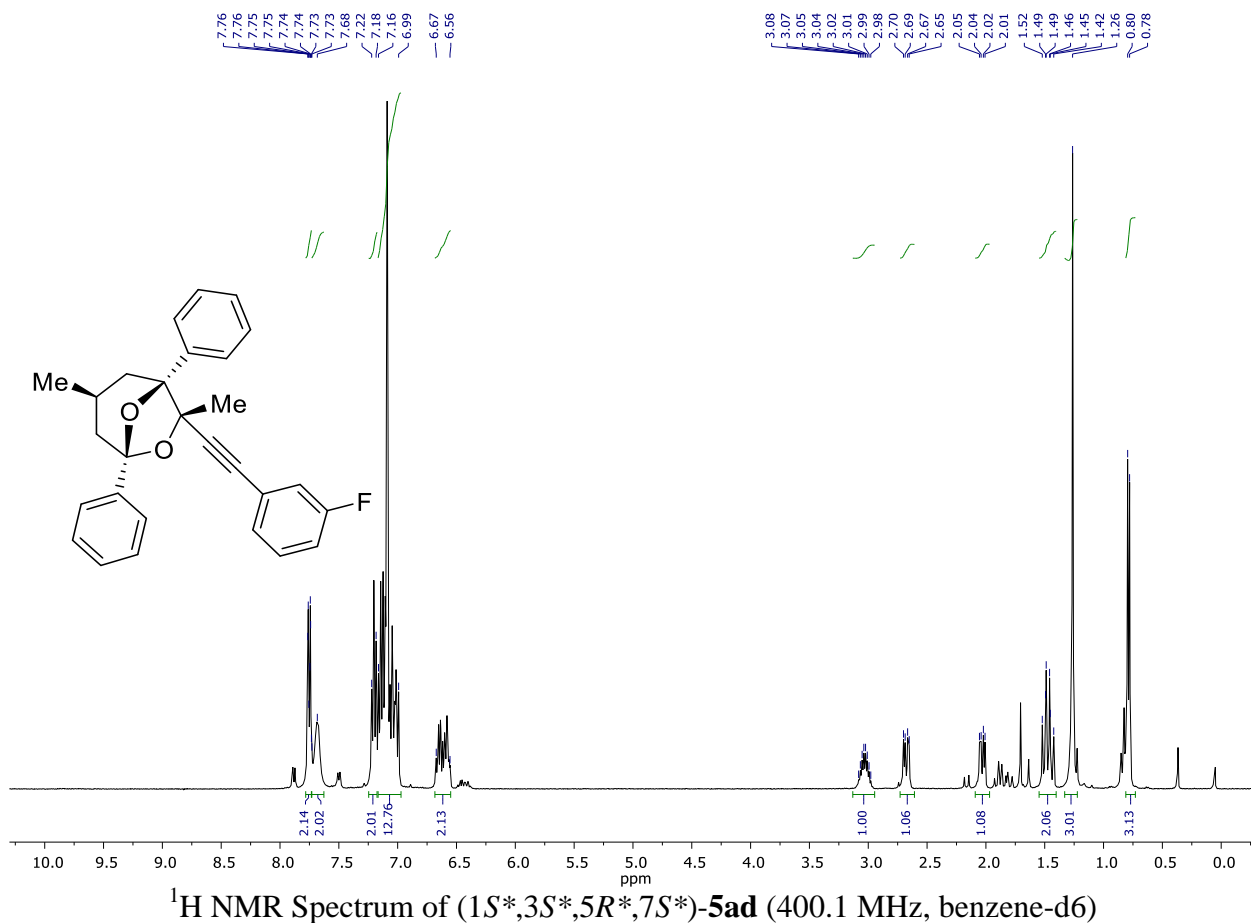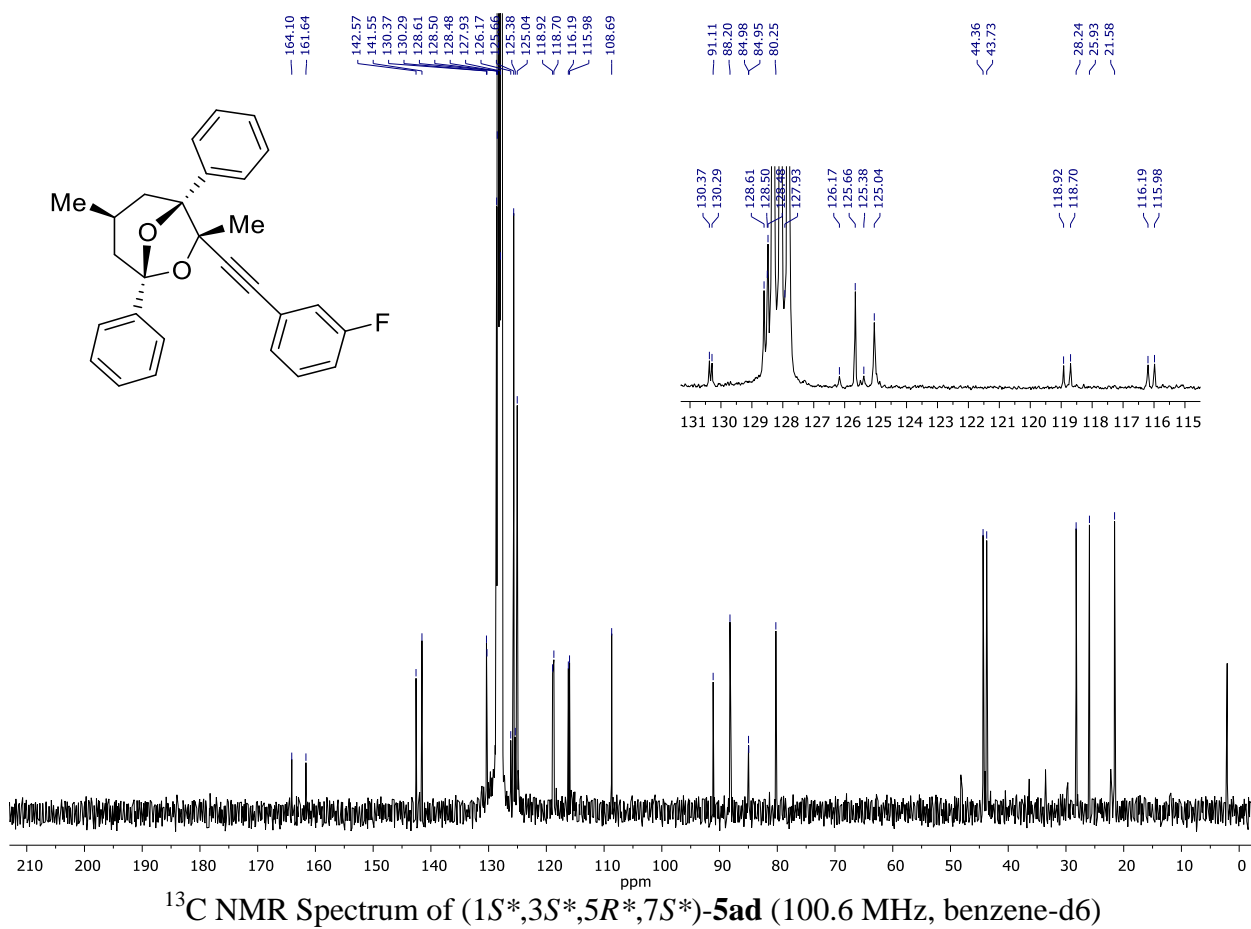

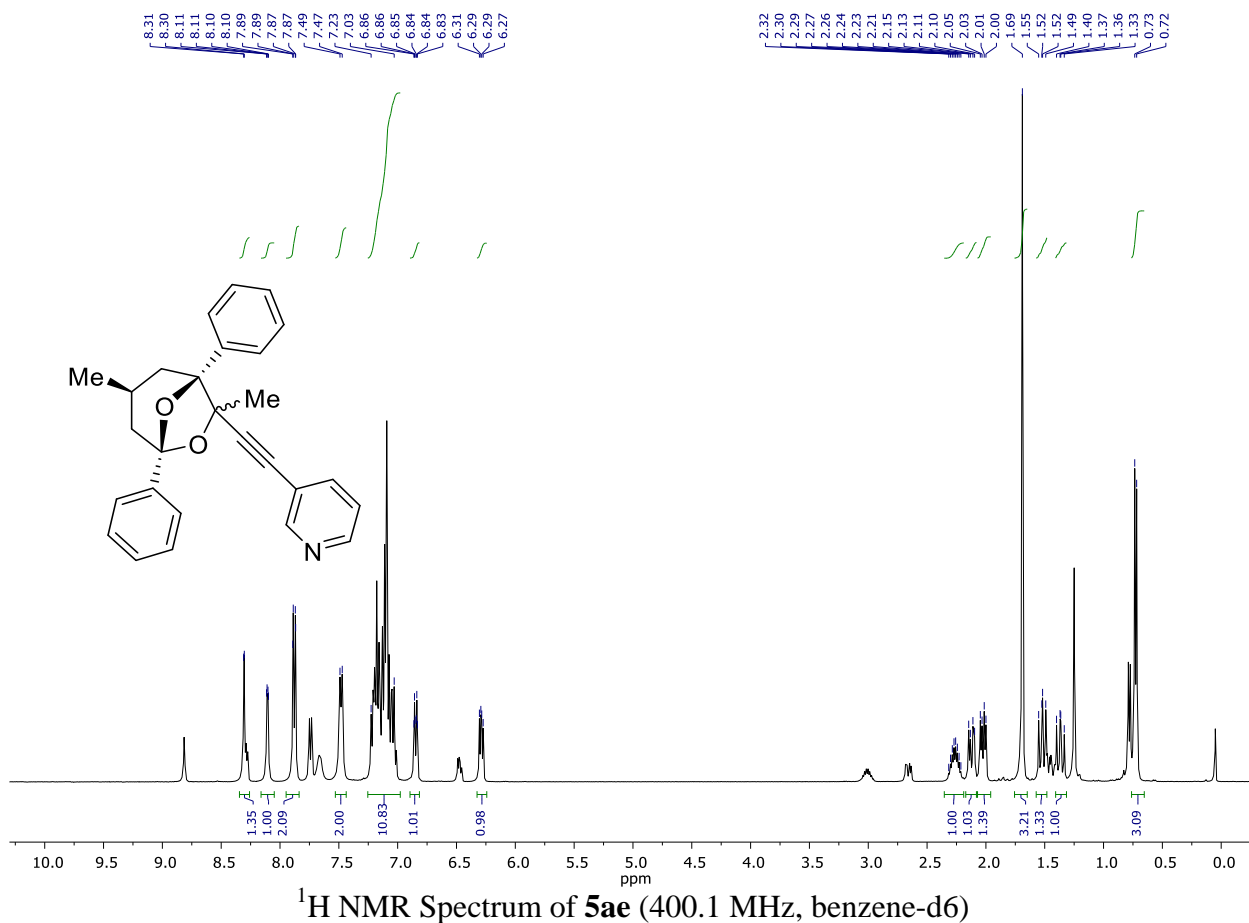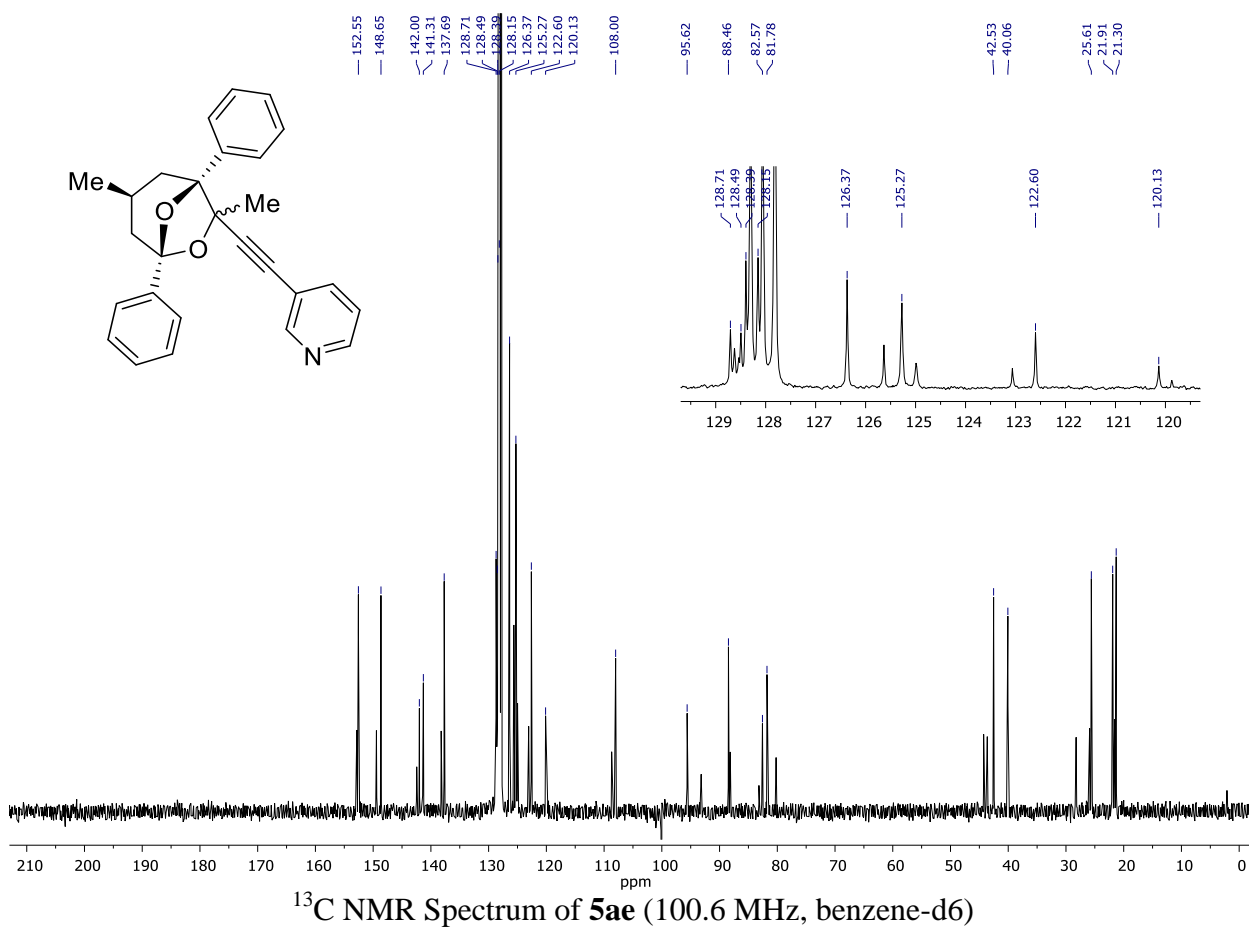

Supplement: d3ob00252g1.pdf [file d3ob00252g1.pdf]
